# Supplementary material
Source: MDPI journal article supplement (https://www.mdpi.com/2072-4292/14/11/2604)
Supplement: s1 [file remotesensing-1667581-SUPPL_TABLE_S1.xlsx]

## Sheet: Table S1
Improving approaches to mapping seagrass within the Great Barrier Reef: from field to spaceborne earth observation
Table S1. Seagrass mapping events in the GBRWHA, including scale, habitat, species, accuracy, approach, field validation, confidence and source
	Seagrass organization spatial level (SOSL): 1=Patch (1m - 100m), 2=Meadow (100m - 1km), 3=Meso-system meadows (1km - 10km), 4=Sub-regional meadows (10km – 50km), 5=Regional meadows (50km - 100km), 6=Biome (>100 km)
	Observing-platform: aircraft - helicopter, fixed wing; by foot; boat - with camera, diver (free, SCUBA, manta), grab, sled, rake
	Observing-platform-type: ISH = in situ human; ISS = in situ sampler; ISRSP = in situ remote sensing (passive); ISRSA = in situ remote sensing (active); UAV = drone; AIR = Airborne; SAT = spaceborne.
	Image recency to in situ validation: 1 = within 2 weeks; 2 = 2-4 weeks; 3 = 1-2 months; 4 = 2-3 months; 5 = 3-6 months; 6 = 6-12 months; 7 = 1-3 yrs*; 8 = >3 yrs
	Field accuracy: GPS = accuracy not specified; dGPS = differential GPS; ndGPS = non-differential GPS
	Habitat types are defined according to two primary factors: (i) Proximity to the mainland and resulting impact on water quality from runoff – water body types used were either plume affected (estuarine, coastal, reef) or non-plume affected (offshore), (ii) water depth — intertidal (areas that experience some tidal exposure), subtidal (never exposes and shallower than -10m mean sea level, MSL) and…
	Habitats codes: E = estuary; C = coastal; R = reefal; O = offshore; I = intertidal; S = subtidal (<=10m depth); D = deep (>10m depth)
	CR = Cymodocea rotundata, CS = Cymodocea serrulata, EA = Enhalus acoroides, HC = Halophila capricorni, HD = Halophila decipiens, HO = Halophila ovalis, HS = Halophila spinulosa
	HU = Halodule uninervis, SI = Syringodium isoetifolium, TC = Thalassodendron ciliatum, TH = Thalassia hemprichii, ZC = Zostera muelleri subsp. capricorni
	Meadow form: T = transitory; E = enduring
	Meadow-scape: the configuration of a meadows and the arrangement of patches and scars within the area.
	Mapping aproach: FB=Field based; FBH=human interpretation of FB; RS=remote sensing with field calibration; RSH=human interpretation of remote sensed; M=modelled
	Confidence scoring and categories used: very low, <=5 ; low, >5 <=7.5; moderate, >7.5 <=10; high, >10 <= 12; very high, > 12.
	^If date not detailed in publication, DD entered as last day of the month
	*If date of aerial photo not cited, then assumed 1-3 yrs. Google Earth updates imagery (satellite and aerial photos) monthly, but on average map data is between one and three years old (Taylor 2021).
	**species ID uncertain
	ND = no data, not described; NA = not applicable, point data only; not accessible
FID	Survey period	First to Last day	END YYYY-MM-DD	Decade	Year	Month	LOCATION	CY	WT	B	MW	F	BM	scale/resolution	SOSL	AOI	Observing-platform	ISH	ISS	ISRSP	ISRSA	UAV	AIR	SAT	Image-Recency	Image-details	Field validation	Field accuracy	EI	ES	ED	CI	CS	CD	RI	RS	RD	OI	OS	OD	SPECIES	T	E	MDW_TYPE	map accuracy	measures	Meadow boundary creation (polygon)	FB	FBH
1	1983		1983	1980	1983		Shelburne Bay	1						1:250,000	3	Inshore meadows to 4m depth	aircraft - high-wing;, Cessna 185 floatplane - manta tow	1					1	1	7	CZCS 15Apr81, Landsat 31Oct80, 04Mar81	human observation (alt 500ft), in situ point assessments					1	1		1	1					ND (3 species)	1	1	density	ND	cover, relative abundance	unsupervised classification+ bathymetry+in situ point assessments
2	01 November - 15 December 1984	46	1984-12-15	1980	1984	12	Cape York to Cairns	1	1					1:350,000	6	All meadows	boat - diver (free)	1									in situ point assessments	estimation on marine chart using RADAR fix	1	1		1	1								CS, EA, HD, HO, HS, HU, SI, TH	1	1	density	ND	pct cover (10% bins) + harvest	hand-drawn from marine charts from in situ points, dry-transfer lettering (Letraset)		1
3	03 -25 July 1985	23	1985-07-25	1980	1985	07	Mount Adolphus, Flinders Group, Turtle Group, Wizard Reef, Thrush Reef, Cockburn Reef	1						1:350,000	3	All meadows	boat - diver (free)	1									in situ point assessments	estimation on marine chart using RADAR fix							1	1					CS, HD, HO, HS, HU, SI, TH	1	1	density	ND	pct cover (10% bins) + harvest	hand-drawn from marine charts from in situ points, dry-transfer lettering (Letraset)		1
4	1945		1945	1940	1945		Green Island		1					1:12,000	3	All meadows	aircraft - fixed wing						1		8	Dr RW Fairbridge	nil	ND							1	1					ND	1	1	ND	ND	presence	hand drawn, human on-screen interpretation from aerial photo based on 1978 in situ assessments
5	1946		1946	1940	1946		Green Island		1					1:10,000	3	All meadows	aircraft - fixed wing						1		8	aerial oblique (Mr B Hayles)	nil	ND							1	1					ND	1	1	ND	ND	presence	hand drawn, human on-screen interpretation from aerial photo based on 1978 in situ assessments
6	1959		1959	1950	1959		Green Island		1					1:12,000	3	All meadows	aerial photo - Nadir						1		8	Australian Aerial Mapping	nil	ND							1	1					ND	1	1	ND	ND	presence	hand drawn, human on-screen interpretation from aerial photo based on 1978 in situ assessments
7	1969		1969	1960	1969		Green Island		1					1:10,000	3	All meadows	aircraft - fixed wing						1		8	aerial oblique (Peer Productions)	nil	ND							1	1					ND	1	1	ND	ND	presence	hand drawn, human on-screen interpretation from aerial photo based on 1978 in situ assessments
8	02 April 1972	1	1972-04-02	1970	1972	04	Green Island		1					1:12,000	3	All meadows	aerial photo - Nadir						1		8	02 April 1972 (QASCO Brisbane)	nil	ND							1	1					ND	1	1	ND	ND	presence	hand drawn, human on-screen interpretation from aerial photo based on 1978 in situ assessments
9	1973		1973	1970	1973		Green Island		1					1:12,000	3	All meadows	aircraft - fixed wing						1		8	aerial oblique (Mr F Prenzel)	nil	ND							1	1					ND	1	1	ND	ND	presence	hand drawn, human on-screen interpretation from aerial photo based on 1978 in situ assessments
10	05-12 March 1978	8	1978-03-12	1970	1978	03	Green Island		1					1:10,000	3	All meadows	by foot						1		3	25Jan78, alt 600 & 150 m, 3:30pm	human observation, in situ point assessments ((Jan-Jul78))	chain & compass							1	1					CS, HO, HU, TH	1	1	presence	ND	presence	hand drawn on map table from aerial photographs using aero-sketchmaster and plan-variograph (area via a compensating polar planimeter)
11	12-19 May 1978	8	1978-05-19	1970	1978	05	Green Island		1					1:10,000	3	All meadows	by foot						1		1	16May78, alt 600 & 150 m, 3:15pm	human observation, in situ point assessments ((Jan-Jul78))	chain & compass							1	1					CS, HO, HU, TH	1	1	presence	ND	presence	hand drawn on map table from aerial photographs using aero-sketchmaster and plan-variograph (area via a compensating polar planimeter)
12	10-17 July 1978	8	1978-07-17	1970	1978	07	Green Island		1					1:10,000	3	All meadows	by foot						1		1	July 1978, alt 150 m, 9:00am	human observation, in situ point assessments ((Jan-Jul78))	chain & compass							1	1					CS, HO, HU, TH	1	1	presence	ND	presence	hand drawn on map table from aerial photographs using aero-sketchmaster and plan-variograph (area via a compensating polar planimeter)
13	13-15 November 1984	3	1984-11-15	1980	1984	11	Cape Melville to Cape Bedford	1						1:350,000	6	All meadows	aircraft - fixed wing Partenavia 68B						1				human observation (at alt 137 m); in situ point assessments, see Coles et al. (1985)	GPS				1	1		1	1		1	1		ND	1	1	ND	ND	presence	hand drawn, human on-screen interpretation from at altitude assessments
14	01-05 November 1985	6	1985-11-05	1980	1985	11	Cape Melville to Cape Bedford	1						1:350,000	6	All meadows	aircraft - fixed wing Partenavia 68B						1				human observation (at alt 137 m)	GPS				1	1		1	1		1	1		ND	1	1	ND	ND	presence	hand drawn, human on-screen interpretation from at altitude assessments
15	21-26 April 1985	6	1985-04-26	1980	1985	04	Campbell Point to Hunter Point	1						1:350,000	6	All meadows	aircraft - fixed wing Partenavia 68B						1				human observation (at alt 137 m)	GPS				1	1		1	1		1	1		ND	1	1	ND	ND	presence	hand drawn, human on-screen interpretation from at altitude assessments
16	17-21 November 1985	5	1985-11-21	1980	1985	11	Campbell Point to Hunter Point	1						1:350,000	6	All meadows	aircraft - fixed wing Partenavia 68B						1				human observation (at alt 137 m)	GPS				1	1		1	1		1	1		ND	1	1	ND	ND	presence	hand drawn, human on-screen interpretation from at altitude assessments
17	31 October - 07 November 1985	8	1985-11-07	1980	1985	11	Princess Charlotte Bay	1						1:350,000	5	All meadows	aircraft - fixed wing Partenavia 68B						1				human observation (at alt 137 m)	GPS				1	1		1	1		1	1		ND	1	1	ND	ND	presence	hand drawn, human on-screen interpretation from at altitude assessments
18	18-25 November 1986	8	1986-11-25	1980	1986	11	Midge Pt to Clairview				1			1:350,000	6	All meadows	aircraft - fixed wing Partenavia 68B						1				human observation (at alt 137 m); in situ point assessments, see Coles et al. (1985)	GPS				1	1		1	1		1	1		ND	1	1	ND	ND	presence	hand drawn, human on-screen interpretation from at altitude assessments
19	29 September - 21 October 1987	23	1987-10-21	1980	1987	10	Cape Cleveland to Midge Pt			1	1			1:350,000	6	All meadows	aircraft - fixed wing Partenavia 68B						1				human observation (at alt 137 m); in situ point assessments, see Coles et al. (1985)	GPS				1	1		1	1		1	1		ND	1	1	ND	ND	presence	hand drawn, human on-screen interpretation from at altitude assessments
20	12-16 October 1987	5	1987-10-16	1980	1987	10	Cairns Section south of Cape Bedford	1	1					1:350,000	6	All meadows	aircraft - fixed wing Partenavia 68B						1				human observation (at alt 137 m); in situ point assessments, see Coles et al. (1985)	GPS				1	1		1	1		1	1		ND	1	1	ND	ND	presence	hand drawn, human on-screen interpretation from at altitude assessments
21	22-24 September 1986	3	1986-09-24	1980	1986	09	Cape Cleveland and Dunk I.		1	1				1:350,000	6	All meadows	aircraft - fixed wing Partenavia 68B						1				human observation (at alt 137 m); in situ point assessments, see Coles et al. (1985)	GPS				1	1		1	1		1	1		ND	1	1	ND	ND	presence	hand drawn, human on-screen interpretation from at altitude assessments
22	19 October - 06 November 1987	19	1987-11-06	1980	1987	11	Cairns to Bowen		1	1				1:350,000	6	All meadows	boat - diver (free)	1									human observation, in situ point assessments	estimation on marine chart using RADAR with a variable range marker	1	1		1	1		1	1					CR, CS, HD, HO, HP, HS, HT, HU, HV, SI, TH, ZC	1	1	density	ND	pct cover (10% bins) + harvest	hand-drawn from marine charts from in situ points, dry-transfer lettering (Letraset)		1
23	11 March - 04 April 1987	25	1987-04-04	1980	1987	04	Bowen to Water Park Point			1	1	1		1:350,000	6	All meadows	boat - diver (free)	1									human observation, in situ point assessments	estimation on marine chart using RADAR with a variable range marker	1	1		1	1		1	1					CR, CS, HD, HO, HP, HS, HT, HU, HV, SI, TH, ZC	1	1	density	ND	pct cover (10% bins) + harvest	hand-drawn from marine charts from in situ points, dry-transfer lettering (Letraset)		1
24	25 October and 14 November 1988	21	1988-11-14	1980	1988	11	Water Park Point to Hervey Bay					1	1	1:350,000	6	All meadows	boat - diver (free)	1									human observation, in situ point assessments	estimation on marine chart using RADAR with a variable range marker	1	1		1	1		1	1					HD, HO, HP, HS, HT, HU, HV, SI, ZC	1	1	density	ND	pct cover (10% bins) + harvest	hand-drawn from marine charts from in situ points, dry-transfer lettering (Letraset)		1
25	24-27 July 1993	4	1993-07-27	1990	1993	07	Munro Rf - Howick Group	1						1:350,000	5	All meadows	boat - video camera, grab		1	1							in situ point assessments	GPS					1	1		1	1			1	HD, HO, HS	1	1	ND	ND	percent cover	ND
26	28 Jul - 19 Aug 1993	23	1993-08-19	1990	1993	08	Creech Rf - Corbett Rf	1						1:350,000	3	All meadows	boat - video camera, grab		1	1							in situ point assessments	GPS					1	1		1	1			1	HD, HO, HS, TH	1	1	ND	ND	percent cover	ND
27	15 Nov - 15 Dec 1994	32	1994-12-15	1990	1994	12	Cape Weymouth - Cape Tribulation	1						1:350,000	6	Lagoon >15m depth + >1mn from reef	boat - camera, diver (SCUBA), sled, grab	1	1	1							on-screen assessments, in situ point	GPS						1			1			1	HC, HD, HO, HS, HT	1	1	spp, density	predictive spatial analysis accuracy = 74%	visual estimates	Predictive model using boosted trees, based on in situ points
28	21-28 October 1995	8	1995-10-28	1990	1995	10	Cairns - Palm Islands		1	1				1:350,000	6	Lagoon >15m depth + >1mn from reef	boat - camera, diver (SCUBA), sled, grab	1	1	1							on-screen assessments, in situ point	GPS						1			1			1	HC, HD, HO, HS, HT	1	1	spp, density	predictive spatial analysis accuracy = 74%	visual estimates	Predictive model using boosted trees, based on in situ points
29	10-23 November 1996	14	1996-11-23	1990	1996	11	Hinchinbrook Is - Abbot Pt		1	1				1:350,000	6	Lagoon >15m depth + >1mn from reef	boat - camera, diver (SCUBA), sled, grab	1	1	1							on-screen assessments, in situ point	GPS						1			1			1	HC, HD, HO, HS, HT	1	1	spp, density	predictive spatial analysis accuracy = 74%	visual estimates	Predictive model using boosted trees, based on in situ points
30	31 Oct - 14 Nov 1997	15	1997-11-14	1990	1997	11	Bowen - Shoalwater Bay			1	1	1		1:350,000	6	Lagoon >15m depth + >1mn from reef	boat - camera, diver (SCUBA), sled, grab	1	1	1							on-screen assessments, in situ point	GPS						1			1			1	HC, HD, HO, HS, HT, HU, SI	1	1	spp, density	predictive spatial analysis accuracy = 74%	visual estimates	Predictive model using boosted trees, based on in situ points
31	08-25 November 1998	18	1998-11-25	1990	1998	11	Cairns - Cape Tribulation, Cape York - Cape Weymouth	1	1					1:350,000	6	Lagoon >15m depth + >1mn from reef	boat - camera, diver (SCUBA), sled, grab	1	1	1							on-screen assessments, in situ point	GPS						1			1			1	HC, HD, HO, HS, HT	1	1	spp, density	predictive spatial analysis accuracy = 74%	visual estimates	Predictive model using boosted trees, based on in situ points
32	11-24 November 1999	14	1999-11-24	1990	1999	11	Shoalwater Bay - Hervey Bay					1	1	1:350,000	6	Lagoon >15m depth + >1mn from reef	boat - camera, diver (SCUBA), sled, grab	1	1	1							on-screen assessments, in situ point	GPS						1			1			1	HC, HD, HO, HS, HT	1	1	spp, density	predictive spatial analysis accuracy = 74%	visual estimates	Predictive model using boosted trees, based on in situ points
33	24-28 September 2011	5	2011-09-28	2010	2011	09	Princess Charlotte Bay to Cape Flattery	1						1:10,000	6	All meadows	Aircraft - helicopter	1									human observation, in situ point assessments	GPS				1	1		1	1					CR, EA, HO, HU, SI, TH	1	1	spp, density	mdw boundaries ±10m to ±100m	percent cover, modified visual estimates of biomass	helicopter track & human digitised on-screen interpolation from in situ points (ArcGIS)	1	1
34	13-16 September 2012	4	2012-09-16	2010	2012	09	Princess Charlotte Bay to Cape Flattery	1						1:10,000	6	All meadows	Aircraft - helicopter	1									human observation, in situ point assessments	GPS				1	1		1	1					HO, HU, TH	1	1	spp, density	mdw boundaries ±10m to ±100m	percent cover, modified visual estimates of biomass	helicopter track & human digitised on-screen interpolation from in situ points (ArcGIS)	1	1
35	15-18 September 2013	4	2013-09-18	2010	2013	09	Princess Charlotte Bay to Cape Flattery	1						1:10,000	6	All meadows	Aircraft - helicopter	1									human observation, in situ point assessments	GPS				1	1		1	1					CR, EA, HO, HU, SI, TH	1	1	spp, density	mdw boundaries ±10m to ±100m	percent cover, modified visual estimates of biomass	helicopter track & human digitised on-screen interpolation from in situ points (ArcGIS)	1	1
36	06-10 September 2014	5	2014-09-10	2010	2014	09	Princess Charlotte Bay to Cape Flattery	1						1:10,000	6	All meadows	Aircraft - helicopter	1									human observation, in situ point assessments	GPS				1	1		1	1					CR, CS, EA, HD, HO, HU, TH, ZC	1	1	spp, density	mdw boundaries ±10m to ±100m	percent cover, modified visual estimates of biomass	helicopter track & human digitised on-screen interpolation from in situ points (ArcGIS)	1	1
37	8-21 August 2001	14	2001-08-21	2000	2001	08	Shelburne Bay, Margaret Bay, Home Islands, Sunday Is	1						1:10,000	4	All meadows	helicopter; boat - camera, grab	1	1	1			1	1	8	1:50000, October 1991, June 1992	human observation, in situ point assessments	dGPS				1	1	1	1	1					CS, EA, HD, HO, HS, HU, SI, TH	1	1	spp, density	mdw boundaries ±0.5m to ±100m	modified visual estimates of biomass	helicopter track & human digitised on-screen interpolation from in situ points (ArcGIS)	1	1
38	16-19 November 2009	4	2009-11-19	2000	2009	11	Bustard Bay						1	1:10,000	4	All meadows	helicopter; boat - diver (free)	1									human observation, in situ point assessments		1	1		1	1								HO, HU, ZC	1	1	categorised meadow-scape, spp, density	mdw boundaries ±2m to ±100m	modified visual estimates of biomass	helicopter track & human digitised on-screen interpolation from in situ points (ArcGIS)	1	1
39	20-21 February 1996	2	1996-02-21	1990	1996	02	Cape Flattery			1				1:10,000	4	All meadows	boat - diver (free)	1									human observation, in situ point assessments	ndGPS (±25 m)							1	1					CR, CS, HO, HP, HS, HU, SI, TH	1	1	spp, density	meadow boundaries ±7.5 m to ± 50 m	visual estimates of biomass	human digitised on-screen interpolation from in situ points (MapInfo)		1
40	5-6 Sep and 06 Dec 2017	97	2017-12-06	2010	2017	12	Clairview (Carmila - Clairview Bluff)				1			1:10,000	3	All meadows	helicopter, boat - camera, grab	1	1	1				1	5	Sentinel 2, Landsat 2017	human observation & on-screen assessments, in situ point	GPS				1	1								HO, HU, ZC	1	1	categorised meadow-scape, spp, density	mdw boundaries <5m to ±100m	modified visual estimates of biomass	helicopter track & human digitised on-screen interpolation from in situ points (ArcGIS)	1	1
41	September 2018		2018-09-31^	2010	2018	09	Clairview (Carmila - Clairview Bluff)				1			1:10,000	3	4 selected meadows	Aircraft - helicopter	1						1	7	Sentinel 2, Landsat 2017	human observation, in situ point assessments	GPS				1									HO, HU, ZC		1	categorised meadow-scape, spp, density	mdw boundaries ±20m to ±50m	modified visual estimates of biomass	helicopter track & human digitised on-screen interpolation from in situ points (ArcGIS)	1	1
42	September 2019		2019-09-31^	2010	2019	09	Clairview (Carmila - Clairview Bluff)				1			1:10,000	3	4 selected meadows	Aircraft - helicopter	1						1	7	Sentinel 2, Landsat 2017	human observation, in situ point assessments	GPS				1									HD, HO, HU, ZC		1	categorised meadow-scape, spp, density	mdw boundaries ±20m to ±50m	modified visual estimates of biomass	helicopter track & human digitised on-screen interpolation from in situ points (ArcGIS)	1	1
43	11-12 December 1997	2	1997-12-12	1990	1997	12	Clump Point		1					1:10,000	2	All meadows	boat - diver (free)	1					1		7	20 march 1996, alt 1830m	human observation, in situ point assessments	dGPS				1	1								CS, EA, HD, HO, HU	1	1	spp, density	mdw boundaries ±2.5m to ±50m	visual estimates & pct cover	human on-screen digitising (MapInfo), using in situ points and AP interpretation		1
44	23-24 July 2016	2	2016-07-24	2010	2016	07	Clump Point		1					1:10,000	2	All meadows	boat - diver, camera, grab	1	1	1			1		6	2016,	human observation, in situ video transects & point assessments	dGPS				1	1								HU	1	1	density	ND	percent cover	human on-screen digitising of visible features from georectified aerial photographs (MapInfo)		1
45	16- 17 May 1999	2	1999-05-17	1990	1999	05	Upstart Bay DPA			1				1:10,000	3	All meadows	helicopter; boat - diver (free), camera, sled, grab	1	1	1			1		6	June 1998, 1:25,000	human observation & on-screen assessments, in situ point	GPS				1	1	1							CS, HD, HO, HS, HU, ZC	1	1	spp, density	ND	visual estimates	human digitised on-screen interpolation from in situ points + aided by AP (MapInfo)		1
46	12-14 October 1999	3	1999-10-17	1990	1999	10	Upstart Bay DPA			1				1:10,000	3	All meadows	helicopter; boat - diver (free), camera, sled, grab	1	1	1			1		7	June 1998, 1:25,000	human observation & on-screen assessments, in situ point	GPS				1	1	1							CS, HD, HO, HS, HT, HU, ZC	1	1	spp, density	ND	visual estimates	human digitised on-screen interpolation from in situ points + aided by AP (MapInfo)		1
47	27 Apr - 22 May 1999	26	1999-05-22	1990	1999	05	Newry region DPA				1			1:10,000	3	All meadows	helicopter; boat - diver (free), camera, sled, grab	1	1	1			1		6	June 1998, 1:25,000	human observation & on-screen assessments, in situ point	GPS				1	1	1							CR, CS, HD, HM, HO, HS, HU, SI, ZC	1	1	spp, density	ND	visual estimates	human digitised on-screen interpolation from in situ points + aided by AP (MapInfo)		1
48	15 - 17 October 1999	3	1999-10-24	1990	1999	10	Newry region DPA				1			1:10,000	3	All meadows	helicopter; boat - diver (free), camera, sled, grab	1	1	1			1		7	June 1998, 1:25,000	human observation & on-screen assessments, in situ point	GPS				1	1	1							CS, HD, HO, HS, HU, SI, ZC	1	1	spp, density	ND	visual estimates	human digitised on-screen interpolation from in situ points + aided by AP (MapInfo)		1
49	28 Apr - 24 May 1999	27	1999-05-24	1990	1999	05	Llewellyn Bay DPA				1			1:10,000	3	All meadows	helicopter; boat - diver (free), camera, sled, grab	1	1	1			1		6	June 1998, 1:25,000	human observation & on-screen assessments, in situ point	GPS				1	1	1							HO, HU, ZC	1	1	spp, density	ND	visual estimates	human digitised on-screen interpolation from in situ points + aided by AP (MapInfo)		1
50	18 October 1999	1	1999-10-18	1990	1999	10	Llewellyn Bay DPA				1			1:10,000	3	All meadows	helicopter; boat - diver (free), camera, sled, grab	1	1	1			1		7	June 1998, 1:25,000	human observation & on-screen assessments, in situ point	GPS				1	1	1							HD, HS, HU, ZC	1	1	spp, density	ND	visual estimates	human digitised on-screen interpolation from in situ points + aided by AP (MapInfo)		1
51	28 Apr - 25 May 1999	28	1999-05-25	1990	1999	05	Ince Bay DPA				1			1:10,000	3	All meadows	helicopter; boat - diver (free), camera, sled, grab	1	1	1			1		6	June 1998, 1:25,000	human observation & on-screen assessments, in situ point	GPS				1	1	1							HO, HS, HU, ZC	1	1	spp, density	ND	visual estimates	human digitised on-screen interpolation from in situ points + aided by AP (MapInfo)		1
52	18-19 October 1999	2	1999-10-19	1990	1999	10	Ince Bay DPA				1			1:10,000	3	All meadows	helicopter; boat - diver (free), camera, sled, grab	1	1	1			1		7	June 1998, 1:25,000	human observation & on-screen assessments, in situ point	GPS				1	1	1							HD, HO, HS, HU, ZC	1	1	spp, density	ND	visual estimates	human digitised on-screen interpolation from in situ points + aided by AP (MapInfo)		1
53	28 April 1999	1	1999-04-28	1990	1999	04	Clairview DPA				1			1:50,000	3	All meadows	Aircraft - helicopter	1					1		6	June 1998, 1:25,000	human observation, in situ point assessments	GPS				1									HO, HU	1	1	spp, density	ND	visual estimates	human digitised on-screen interpolation from in situ points + aided by AP (MapInfo)		1
54	07-16 October 1996	10	1996-10-16	1990	1996	10	Dunk Island to Cleveland Bay		1	1				1:10,000	6	All meadows	boat - diver (free)	1					1		7	26 Sep 1995, alt 1830m	human observation, in situ point assessments	GPS; ±5m	1	1		1	1		1	1					CR, CS, HD, HO, HP, HS, HT, HU, SI, TH, ZC	1	1	spp, density	mdw boundaries ±10m to ±500m	visual estimates	human digitised on-screen interpolation from in situ points + aided by AP (MapInfo + ArcView)		1
55	20 March 2004	1	2011-03-20	2010	2011	03	Hinchinbrook Channel		1					1:10,000	4	All meadows	Aircraft - helicopter	1									human observation, in situ point assessments	GPS	1			1									EA		1	spp, density	ND	percent cover	human digitised on-screen interpolation from in situ points (Arc GIS)		1
56	20 March 2004	1	2011-03-20	2010	2011	03	Mourilyan Harbour		1					1:10,000	3	All meadows	Aircraft - helicopter	1									human observation, in situ point assessments	GPS	1												HO	1		spp, density	ND	percent cover	human digitised on-screen interpolation from in situ points (Arc GIS)		1
57	17 March 2014	1	2014-03-17	2010	2014	03	Frankland Islands		1					1:10,000	3	All meadows	by foot; boat - bathyscope, grab		1	1							human observation, in situ point assessments	GPS; ±5m							1	1					HO, HU, TH	1	1	spp, density	mdw boundaries ±<3m	percent cover	GPS track, human on-screen interpolation from in situ points (ArcGIS)	1	1
58	29 May - 04 Jun 1997	7	1997-06-04	1990	1997	06	Princess Charlotte Bay and Bathurst Bay Region	1						1:10,000	4	All meadows	boat - diver (free), grab	1	1								human observation, in situ point assessments	dGPS; ±1m				1	1	1							CS, HD, HO, HP, HS, HT, HU, SI, TH	1	1	spp, density	ND	percent cover	Inverse Distance Weighted interpolation from in situ points (ArcView) fixed 1000 metres radius, smoothed using mean neighbourhood 100 x 100 m cells		1
59	13-19 November 1997	7	1997-11-19	1990	1997	11	Princess Charlotte Bay and Bathurst Bay Region	1						1:10,000	4	All meadows	boat - diver (free), grab	1	1								human observation, in situ point assessments	dGPS; ±1m				1	1	1							CS, CR, HD, HO, HS, HT, HU, HV, SI, TH	1	1	spp, density	ND	percent cover	Inverse Distance Weighted interpolation from in situ points (ArcView) fixed 1000 metres radius, smoothed using mean neighbourhood 100 x 100 m cells		1
60	mid May, 1999		1999-05-16	1990	1999	05	Abel Pt Marina				1			1:10,000	2	All meadows	Boat - diver tows, spot dives	1									human observation, in situ point assessments	GPS				1	1								CR, HD, HO, HU	1	1	spp, density	ND	percent cover	human digitised on-screen interpolation from in situ points		1
61	09-14 November 2004	6	2004-11-14	2000	2004	11	Boat Haven and Charlies Bays				1			1:10,000	2	All meadows	by foot; Boat - diver tows, spot dives	1									human observation, in situ point assessments	GPS; 4-6m				1	1								HO, HS, HU, SI, ZC	1	1	spp, density, categorised cover	mdw boundaries ±5m	modified visual estimates of biomass	human digitised on-screen interpolation from in situ points (Arc GIS)		1
62	1991		1991	1990	1991		Boat Haven Bay (Port of Airlie)				1			1:10,000	2	All meadows	ND										ND	ND				1	1								ND	1	1	ND	ND	ND	ND
63	26-28 August 2003	3	2003-08-28	2000	2003	08	Boat Haven Bay (Port of Airlie)				1			1:10,000	2	All meadows	by foot; Boat - diver tows, spot dives	1									human observation, in situ point assessments	GPS				1	1								HO, HS, HU, ZC	1	1	spp, density	ND	overall cover, density, biomass	human digitised on-screen interpolation from in situ points		1
64	September 2002		2002-09-30^	2000	2002	09	Boat Haven Bay (Port of Airlie)				1			1:10,000	2	All meadows	by foot; Boat - diver tows, spot dives	1									human observation, in situ point assessments	GPS				1	1								HM, HO, HP, HS, HU, ZC	1	1	spp, density	ND	overall cover, density, biomass	human digitised on-screen interpolation from in situ points		1
65	November 2005		2005-11-30^	2000	2005	11	Boat Haven Bay (Port of Airlie)				1			1:10,000	2	Selected transects	by foot; Boat - diver tows, spot dives	1									human observation, in situ point assessments	GPS				1	1								HO, HU, ZC	1	1	spp, density, categorised cover	ND	percent cover, visual estimate of biomass	human digitised on-screen interpolation from in situ points		1
66	November 2007		2007-11-30^	2000	2007	11	Boat Haven Bay (Port of Airlie)				1			1:10,000	2	Selected transects	by foot; Boat - diver tows, spot dives	1									human observation, in situ point assessments	GPS				1	1								HO, HU, ZC	1	1	spp, density, categorised cover	ND	percent cover, visual estimate of biomass	human digitised on-screen interpolation from in situ points		1
67	June 2008		2008-06-30^	2000	2008	06	Boat Haven Bay (Port of Airlie)				1			1:10,000	2	Selected transects	by foot; Boat - diver tows, spot dives	1									human observation, in situ point assessments	GPS				1	1								HO, HU, ZC	1	1	spp, density, categorised cover	ND	percent cover, visual estimate of biomass	human digitised on-screen interpolation from in situ points		1
68	November 2008		2008-11-31^	2000	2008	11	Boat Haven Bay (Port of Airlie)				1			1:10,000	2	Selected transects	by foot; Boat - diver tows, spot dives	1									human observation, in situ point assessments	GPS				1	1								HO, HU, ZC	1	1	spp, density, categorised cover	ND	percent cover, visual estimate of biomass	human digitised on-screen interpolation from in situ points		1
69	July 2012		2012-07-31^	2010	2012	07	Boat Haven Bay (Port of Airlie)				1			1:10,000	2	Selected transects	by foot; Boat - diver tows, spot dives	1									human observation, in situ point assessments	GPS				1	1								HO, HU, ZC	1	1	spp, density, categorised cover	ND	percent cover, visual estimate of biomass	human digitised on-screen interpolation from in situ points		1
70	22-25 November 2014	4	2014-11-25	2010	2014	11	Boat Haven Bay (Port of Airlie) + Charlies Bay				1			1:10,000	2	All meadows	by foot; Boat - diver (free, SCUBA), towed video sled	1		1			1		7	Google Earth 2015	human observation, in situ point assessments	GPS				1	1								HD, HO, HS, HU, ZC	1	1	spp, density, categorised cover	ND	percent cover, visual estimate of biomass	human digitised on-screen interpolation from in situ points (Arc GIS)		1
71	17-19 November 2015	3	2015-11-19	2010	2015	11	Boat Haven Bay (Port of Airlie) + Charlies Bay				1			1:10,000	2	All meadows	by foot; Boat - diver (free, SCUBA), towed video	1		1			1		7	Google Earth 2015	human observation, in situ point assessments	GPS				1	1								HD, HO, HS, HU, SI, ZC	1	1	spp, density, categorised cover	ND	percent cover, visual estimate of biomass	human digitised on-screen interpolation from in situ points (Arc GIS)		1
72	23-26 April 2007	4	2007-04-26	2000	2007	04	Edgecumbe Bay (Eden Lassie Creek - Gregory River)				1			1:10,000	3	Selected transects	by foot; boat - bathyscope, rake	1	1	1							human observation, in situ point assessments	GPS	1	1		1	1								HO, ZC	1	1	spp, density	ND	modified ‘visual estimate of biomass’	human digitised on-screen interpolation from in situ points		1
73	Nov. 2002		2002-11-30^	2000	2002	11	Edgecumbe Bay (Eden Lassie Creek - Gregory River)				1			1:10,000	3	Selected transects	by foot; boat - bathyscope, rake	1	1	1							human observation, in situ point assessments	GPS	1	1		1	1								HO, ZC	1	1	spp, density	ND	presence/absence	human digitised on-screen interpolation from in situ points		1
74	Nov. 2003		2003-11-30^	2000	2003	11	Edgecumbe Bay (Eden Lassie Creek - Gregory River)				1			1:10,000	3	Selected transects	by foot; boat - bathyscope, rake	1	1	1							human observation, in situ point assessments	GPS	1	1		1	1								HO, HU, ZC	1	1	spp, density	ND	presence/absence	human digitised on-screen interpolation from in situ points		1
75	Nov. 2004		2004-11-30^	2000	2004	11	Edgecumbe Bay (Eden Lassie Creek - Gregory River)				1			1:10,000	3	Selected transects	by foot; boat - bathyscope, rake	1	1	1							human observation, in situ point assessments	GPS	1	1		1	1								HO, HU, ZC	1	1	spp, density	ND	presence/absence	human digitised on-screen interpolation from in situ points		1
76	October 2005		2005-10-31^	2000	2005	10	Edgecumbe Bay (Eden Lassie Creek - Gregory River)				1			1:10,000	3	Selected transects	by foot; boat - bathyscope, rake	1	1	1							human observation, in situ point assessments	GPS	1	1		1	1								HO, HU, ZC	1	1	spp, density	ND	presence/absence	human digitised on-screen interpolation from in situ points		1
77	April 2008		2008-04-30^	2000	2008	04	Edgecumbe Bay (Eden Lassie Creek - Gregory River)				1			1:10,000	3	Selected transects	by foot; boat - bathyscope, rake	1	1	1							human observation, in situ point assessments	GPS	1	1		1	1								HO, ZC	1	1	spp, density	ND	modified ‘visual estimate of biomass’	human digitised on-screen interpolation from in situ points		1
78	Jul. 1999		1999-07-31^	1990	1999	07	Edgecumbe Bay (Sinclaire Bay - White Cliffs)				1			1:10,000	3	All meadows	by foot; boat - bathyscope, rake	1	1	1			1		6		human observation, in situ point assessments	GPS	1	1		1	1								HO, ZC	1	1	spp, density	ND	modified ‘visual estimate of biomass’	human digitised on-screen interpolation from in situ points		1
79	Oct. 1999		1999-10-31^	1990	1999	10	Edgecumbe Bay (Sinclaire Bay - White Cliffs)				1			1:10,000	3	All meadows	by foot; boat - bathyscope, rake	1	1	1			1		6		human observation, in situ point assessments	GPS	1	1		1	1								HO, ZC	1	1	spp, density	ND	modified ‘visual estimate of biomass’	human digitised on-screen interpolation from in situ points		1
80	Nov. 2000		2000-11-30^	2000	2000	11	Edgecumbe Bay (Sinclaire Bay - White Cliffs)				1			1:10,000	3	All meadows	by foot; boat - bathyscope, rake	1	1	1			1		6		human observation, in situ point assessments	GPS	1	1		1	1								HO, ZC	1	1	spp, density	ND	modified ‘visual estimate of biomass’	human digitised on-screen interpolation from in situ points		1
81	October 2001		2001-10-31^	2000	2001	10	Edgecumbe Bay (Sinclaire Bay - White Cliffs)				1			1:10,000	3	Selected transects	by foot; boat - bathyscope, rake	1	1	1							human observation, in situ point assessments	GPS	1	1		1	1								HO, ZC	1	1	spp, density	ND	presence/absence	human digitised on-screen interpolation from in situ points		1
82	15 to 19 November 2010	5	2010-11-19	2010	2010	11	Great Keppel Island					1		1:10,000	3	All meadows	boat - diver (free)	1									human observation, in situ point assessments	GPS							1	1					HO, HS, HU, SI	1	1	spp, density	ND	percent cover, visual estimates of biomass	human digitised on-screen interpolation from in situ points (Arc GIS)		1
83	17 to 21 January 2011	5	2011-01-21	2010	2011	01	Great Keppel Island					1		1:10,000	3	All meadows	boat - diver (free)	1									human observation, in situ point assessments	GPS							1	1					HO, HS, HU, SI	1	1	spp, density	ND	percent cover, visual estimates of biomass	human digitised on-screen interpolation from in situ points (Arc GIS)		1
84	30-31 March 2011	2	2011-03-31	2010	2011	03	Great Keppel Island					1		1:10,000	3	All meadows	boat - diver (free)	1									human observation, in situ point assessments	GPS							1	1					HO, HS, HU, SI	1	1	spp, density	ND	percent cover, visual estimates of biomass	human digitised on-screen interpolation from in situ points (Arc GIS)		1
85	30 Apr-02 May 2011	4	2011-05-02	2010	2011	05	Great Keppel Island					1		1:10,000	3	All meadows	boat - diver (free)	1									human observation, in situ point assessments	GPS							1	1					HO, HS, HU, SI	1	1	spp, density	ND	percent cover, visual estimates of biomass	human digitised on-screen interpolation from in situ points (Arc GIS)		1
86	11-14 July 2011	4	2011-07-14	2010	2011	07	Great Keppel Island					1		1:10,000	3	All meadows	boat - diver (free)	1									human observation, in situ point assessments	GPS							1	1					HO, HU	1	1	spp, density	ND	percent cover, visual estimates of biomass	human digitised on-screen interpolation from in situ points (Arc GIS)		1
87	08- 09 July 1997	2	1997-07-09	1990	1997	07	Ince Bay				1			1:10,000	3	All meadows	Aircraft (Skyfox two seater); by foot; boat - bathyscope, rake		1	1			1		8	AP 1977, 1985 and 1994	human observation, in situ point assessments	GPS				1	1								HO, HP, HU			spp, density	ND	percent cover, species, shoot density, biomass	human digitised on-screen interpolation from in situ points		1
88	14 February 2014	1	2014-02-14	2010	2014	02	Leekes Creek Estuary (Great Keppel Island)					1		1:10,000	2	All meadows	boat - video on a tow sled		1	1							in situ video transects & spots	GPS								1					HO, HU	1	1	spp, density	ND	percent cover	human digitised on-screen interpolation from in situ points (Arc GIS)		1
89	19–22 August 2014	4	2014-08-22	2010	2014	08	Leekes Creek Estuary (Great Keppel Island)					1		1:10,000	2	All meadows	boat - video on a tow sled		1	1							in situ video transects & spots	GPS								1					HO, HU	1	1	spp, density	ND	percent cover	human digitised on-screen interpolation from in situ points (Arc GIS)		1
90	15–18 November 2014	4	2014-11-18	2010	2014	11	Leekes Creek Estuary (Great Keppel Island)					1		1:10,000	2	All meadows	boat - video on a tow sled		1	1							in situ video transects & spots	GPS								1					HO, HU	1	1	spp, density	ND	percent cover	human digitised on-screen interpolation from in situ points (Arc GIS)		1
91	2–5 May 2015	4	2015-05-05	2010	2015	05	Leekes Creek Estuary (Great Keppel Island)					1		1:10,000	2	All meadows	boat - video on a tow sled		1	1							in situ video transects & spots	GPS								1					HO, HU	1	1	spp, density	ND	percent cover	human digitised on-screen interpolation from in situ points (Arc GIS)		1
92	June 2008		2008-06-30^	2000	2008	06	Oyster Point, Hinchinbrook		1					1:10,000	3	All meadows	boat - diver (free), rake	1	1								human observation, in situ point assessments	GPS				1	1								HD, HO, HP, HS, HT, HU	1	1	spp, density	ND	visual estimates of biomass	human on-screen interpolation from in situ points, over digitally rectified aerial photographs (MapInfo)		1
93	December 2008		2008-12-31^	2000	2008	12	Oyster Point, Hinchinbrook		1					1:10,000	3	All meadows	boat - diver (free), rake	1	1				1			DNRW	human observation, in situ point assessments	GPS				1	1								HD, HO, HP, HS, HU	1	1	spp, density	ND	visual estimates of biomass	human on-screen interpolation from in situ points, over digitally rectified aerial photographs (MapInfo)		1
94	November 2003		2003-11-30^	2000	2003	11	Pioneer and Boat Haven Bays				1			1:10,000	3	Selected transects	boat - diver (free), rake	1	1								human observation, in situ point assessments	GPS				1	1								HO, HS, HU, ZC	1	1	spp, density	ND	overall cover, density, biomass	human digitised on-screen interpolation from in situ points		1
95	April 2004		2004-04-30^	2000	2004	04	Pioneer and Boat Haven Bays				1			1:10,000	3	Selected transects	Boat - diver tows	1									human observation, in situ point assessments	GPS				1	1								HO, HU, ZC	1	1	spp, density	ND	overall cover, density, biomass	human digitised on-screen interpolation from in situ points		1
96	May-05 t1		2005-05-15^	2000	2005	05	Pioneer and Boat Haven Bays				1			1:10,000	3	Selected transects	boat - diver (free), rake	1	1								human observation, in situ point assessments	GPS				1	1								HO, HS, HU, ZC	1	1	spp, density	ND	overall cover, density, biomass	human digitised on-screen interpolation from in situ points		1
97	May-05 t2		2005-05-31^	2000	2005	05	Pioneer and Boat Haven Bays				1			1:10,000	3	Selected transects	boat - diver (free), rake	1	1								human observation, in situ point assessments	GPS				1	1								HO, HU, ZC	1	1	spp, density	ND	overall cover, density, biomass	human digitised on-screen interpolation from in situ points		1
98	May 2006		2006-05-31^	2000	2006	05	Pioneer and Boat Haven Bays				1			1:10,000	3	All meadows + Selected transects	By foot; boat - diver (free), rake	1	1								human observation, in situ point assessments	GPS				1	1								HO, HU, ZC	1	1	spp, density	ND	overall cover, density, biomass	human digitised on-screen interpolation from in situ points		1
99	Jun 2006		2006-06-15^	2000	2006	06	Pioneer and Boat Haven Bays				1			1:10,000	3	Selected transects	boat - diver (free), rake	1	1								human observation, in situ point assessments	GPS				1	1								HO, HU, ZC	1	1	spp, density	ND	overall cover, density, biomass	human digitised on-screen interpolation from in situ points		1
100	November 2004		2004-11-30^	2000	2004	11	Pioneer Bay				1			1:10,000	3	Selected transects	boat - diver (free), rake	1	1								human observation, in situ point assessments	GPS				1	1								HO, HS, HU, ZC	1	1	spp, density	ND	overall cover, density, biomass	human digitised on-screen interpolation from in situ points		1
101	28-30 November 1999	3	1999-11-30	1990	1999	11	Pioneer, Boat Haven and Charlies Bays				1			1:10,000	3	Selected transects	boat - diver (free), rake	1	1								human observation, in situ point assessments	GPS				1	1								HO, HP, HS, HU, ZC	1	1	spp, density	ND	overall cover, density, biomass	human digitised on-screen interpolation from in situ points		1
102	April 1998		1998-04-30^	1990	1998	04	Pioneer, Boat Haven and Charlies Bays				1			1:10,000	3	Selected transects	boat - diver (free), rake	1	1								human observation, in situ point assessments	GPS				1	1								CS, HO, HP, HU, ZC	1	1	spp, density	ND	overall cover, density, biomass	human digitised on-screen interpolation from in situ points		1
103	November 1998		1998-11-30^	1990	1998	11	Pioneer, Boat Haven and Charlies Bays				1			1:10,000	3	Selected transects	boat - diver (free), rake	1	1								human observation, in situ point assessments	GPS				1	1								CS, HO, HP, HU, ZC	1	1	spp, density	ND	overall cover, density, biomass	human digitised on-screen interpolation from in situ points		1
104	May 1999		1999-05-31^	1990	1999	05	Pioneer, Boat Haven and Charlies Bays				1			1:10,000	3	Selected transects	boat - diver (free), rake	1	1								human observation, in situ point assessments	GPS				1	1								HO, HP, HU, ZC	1	1	spp, density	ND	overall cover, density, biomass	human digitised on-screen interpolation from in situ points		1
105	June 2000		2000-06-30^	2000	2000	06	Pioneer, Boat Haven and Charlies Bays				1			1:10,000	3	Selected transects	boat - diver (free), rake	1	1								human observation, in situ point assessments	GPS				1	1								HO, HU, ZC	1	1	spp, density	ND	overall cover, density, biomass	human digitised on-screen interpolation from in situ points		1
106	November 2000		2000-11-30^	2000	2000	11	Pioneer, Boat Haven and Charlies Bays				1			1:10,000	3	Selected transects	boat - diver (free), rake	1	1								human observation, in situ point assessments	GPS				1	1								HO, HS, HU, ZC	1	1	spp, density	ND	overall cover, density, biomass	human digitised on-screen interpolation from in situ points		1
107	June 2001		2001-06-30^	2000	2001	06	Pioneer, Boat Haven and Charlies Bays				1			1:10,000	3	Selected transects	boat - diver (free), rake	1	1								human observation, in situ point assessments	GPS				1	1								HO, HS, HU, ZC	1	1	spp, density	ND	overall cover, density, biomass	human digitised on-screen interpolation from in situ points		1
108	November 2001		2001-11-30^	2000	2001	11	Pioneer, Boat Haven and Charlies Bays				1			1:10,000	3	Selected transects	boat - diver (free), rake	1	1								human observation, in situ point assessments	GPS				1	1								HO, HS, HU, ZC	1	1	spp, density	ND	overall cover, density, biomass	human digitised on-screen interpolation from in situ points		1
109	June 2002		2002-06-30^	2000	2002	06	Pioneer, Boat Haven and Charlies Bays				1			1:10,000	3	Selected transects	boat - diver (free), rake	1	1								human observation, in situ point assessments	GPS				1	1								HO, HU, ZC	1	1	spp, density	ND	overall cover, density, biomass	human digitised on-screen interpolation from in situ points		1
110	April 2003		2003-04-30^	2000	2003	04	Pioneer, Boat Haven and Charlies Bays				1			1:10,000	3	Selected transects	boat - diver (free), rake	1	1								human observation, in situ point assessments	GPS				1	1								HO, HS, HU, ZC	1	1	spp, density	ND	overall cover, density, biomass	human digitised on-screen interpolation from in situ points		1
111	November 2008		2008-11-30^	2000	2008	11	Pioneer, Boat Haven and Charlies Bays				1			1:10,000	3	All meadows + Selected transects	By foot; boat - diver (free), rake	1	1						7	Google Earth	human observation, in situ point assessments	GPS				1	1								HO, HS, HU, ZC	1	1	spp, density	ND	overall cover, density, biomass	human digitised on-screen interpolation from in situ points		1
112	February 2006		2006-02-28^	2000	2006	02	Port Dennison (incl Bowen Boat Harbour)			1				1:10,000	3	All meadows	ND										ND	ND				1	1								HO, HU	1	1	spp, density	ND	percent cover	human digitised on-screen interpolation from in situ points		1
113	December 2008		2008-12-31^	2000	2008	12	Port Dennison (incl Lighthouse (North Head) and Stone islands)			1				1:10,000	3	All meadows	by foot; boat - diver (free, SCUBA), rake	1	1	1							human observation, in situ point assessments	GPS				1	1								CS, HO, HU, HS, SI, ZC	1	1	spp, density	ND	percent cover	human digitised on-screen interpolation from in situ points		1
114	May 2004		2004-05-31^	2000	2004	05	Port Douglas (Dicksons Inlet - Cooya Point)		1					1:10,000	3	All meadows	by foot; boat - bathyscope, rake	1	1	1							human observation, in situ point assessments	GPS	1	1		1	1								EA, HO, HU, ZC	1	1	presence	ND	percent cover	human digitised on-screen interpolation from in situ points (Arc GIS)		1
115	December 2005		2005-12-31^	2000	2005	12	Port Douglas (Trinity Bay)		1					1:12,000	3	All meadows	boat - diver	1									human observation, in situ point & transect assessments	GPS					1	1							HT	1		spp, presence	ND	presence/absence	human digitised on-screen interpolation from in situ points (Arc GIS)		1
116	October 2004		2004-10-31^	2000	2004	10	Rosslyn Bay Boat Harbour					1		1:10,000	3	All meadows	ND										ND	ND					1								HO	1		spp, density	ND	ND	ND
117	1991		1991	1990	1991		Shute Bay				1			1:10,000	3	All meadows	ND										ND	ND				1	1								CS, HO, HU	1	1	ND	ND	ND	ND
118	29 August 1999	1	1999-08-29	1990	1999	08	Shute Bay				1			1:10,000	3	All meadows	boat - diver (free), rake	1	1				1		8	August 1993	human observation, in situ point assessments	dGPS				1	1								HO, HS, HU, SI, ZC	1	1	spp, density	ND	percent cover	human digitised on-screen interpolation from in situ points		1
119	19–22 February 2002	4	2002-02-22	2000	2002	02	Shute Bay				1			1:12,000	3	All meadows	boat - diver (free), rake	1	1								human observation, in situ point assessments	GPS				1	1								HO, HU	1	1	spp, density	ND	percent cover, modified ‘visual estimate of biomass’, species	human digitised on-screen interpolation from in situ points		1
120	22-24 October 2002	3	2002-10-24	2000	2002	10	Shute Bay				1			1:12,000	3	All meadows	boat - diver (free), rake	1	1								human observation, in situ point assessments	GPS				1	1								HO, HS, HU	1	1	spp, density	ND	percent cover, modified ‘visual estimate of biomass’, species	human digitised on-screen interpolation from in situ points		1
121	February 2003		2003-02-28^	2000	2003	02	Shute Bay				1			1:12,000	3	All meadows	boat - diver (free), rake	1	1								human observation, in situ point assessments	GPS				1	1								HO, HS, HU	1	1	spp, density	ND	percent cover, modified ‘visual estimate of biomass’, species	human digitised on-screen interpolation from in situ points		1
122	June 2004		2004-06-30^	2000	2004	06	Shute Bay				1			1:10,000	3	All meadows	boat - diver (free), rake	1	1				1		7		human observation, in situ point assessments	GPS				1	1								HO, HU, ZC	1	1	spp, density	ND	modified visual estimates of biomass	human digitised on-screen interpolation from in situ points (MapInfo)		1
123	April 2007		2007-04-30^	2000	2007	04	Shute Bay				1			1:10,000	3	All meadows	by foot; boat - diver (free, SCUBA), rake	1	1				1		7		human observation, in situ point assessments					1	1								HO, HU, ZC	1	1	spp, density	ND	modified visual estimates of biomass	human digitised on-screen interpolation from in situ points (MapInfo)		1
124	26 October 2018	1	2018-10-26	2010	2018	10	Shute Harbour				1			1:1,000	3	All meadows	boat - diver (free, SCUBA)	1									human observation, in situ point assessments	GPS					1								HD, HO, HS, HU	1	1	spp, density	ND	percent cover	human digitised on-screen interpolation from in situ points (Arc GIS)		1
125	19-23 July 1997	5	1997-07-23	1990	1997	07	Upstart Bay, Cleveland Bay and coast south of Lucinda			1				1:10,000	5	All meadows	by Foot; Hovercraft; boat - diver (free), grab	1	1				1		8		human observation, in situ point assessments	GPS				1	1								CS, HD, HO, HP, HS, HU, ZC			spp, density	ND	percent cover, species, shoot density, biomass	human on-screen interpolation from in situ points, and human interpretation AP		1
126	March 2015		2015-03-31^	2010	2015	03	Whipser Bay (Boat Ramp & Causeway)				1			1:1,000	2	All meadows	boat - diver (free)	1									human observation, in situ point assessments	GPS				1	1								HO, HU	1	1	spp, density	ND	percent cover	human digitised on-screen interpolation from in situ points (Arc GIS)		1
127	21-24 August 2013	4	2013-08-24	2010	2013	08	Lindeman Island				1			1:12,000	3	All meadows	by foot; boat - diver (free), camera	1		1							human observation, in situ photo transects & point assessments	GPS; ±3m							1	1					HD, HO, HS, HU	1	1	density	ND	percent cover	on-screen & Vertical Mapper 3.7 interpolation from in situ points (MapInfo). Grid interpolations were converted to polygons.
128	5-11 May 1995	7	1995-05-11	1990	1995	05	Pioneer, Charles & Boathaven Bays				1			1:50,000	3	All meadows	Boat - diver (SCUBA), grabs	1	1								human observation, in situ point assessments	GPS				1	1								CS, HD, HO, HS, HU, SI, ZC	1	1	spp, density	ND	density, biomass	human digitised on-screen interpolation from in situ points		1
129	19-23 September 1995	5	1995-09-23	1990	1995	09	Pioneer, Charles & Boathaven Bays				1			1:50,000	3	All meadows	Boat - diver (SCUBA), grabs	1	1								human observation, in situ point assessments	GPS				1	1								CS, HD, HO, HS, HU, SI, ZC	1	1	spp, density	ND	density, biomass	human digitised on-screen interpolation from in situ points		1
130	February 1999		1999-02-28^	1990	1999	02	Cockle Bay (Magnetic Is)			1				1:20,000	2	All meadows	By foot; boat-diver (free)	1									ND	ND							1	1					CS, CR, HO, HP, HU, HM	1	1	density	ND	harvest	ND
131	17-22 September 1989	6	1989-09-22	1980	1989	09	Lookout Point to Barrow Point	1						1:350,000	6	All meadows	boat - diver (free, SCUBA)	1									human observation, in situ point assessments					1	1	1	1	1					CR, CS, HD, HO, HV, HS, HT, HU, SI, TH	1	1	density	ND	percent cover	hand-drawn from marine charts from in situ points, dry-transfer lettering (Letraset)		1
132	May 1987 - April 1988		1988-04-30^	1980	1988	04	Green Island		1					1:75,000	3	All meadows	by foot, boat - diver (SCUBA + free)	1									human observation	ND							1	1					CR, CS, HM, HO, HU, TH	1	1	density	ND	percent cover	ND
133	21 Jul to 16 Sep 1992	61	1992-09-16	1990	1992	09	Green Island		1					1:1,000	3	All meadows	by foot, boat - diver (SCUBA + free)	1					1		7	23 July 1991, alt 915m	human observation, in situ point assessments	dGPS							1	1						1	1	spp, biomass	mdw boundaries ±5m	visual estimates	human on-screen digitising (ArcGIS), using in situ points and AP (23 July 1991) colour, texture, and the geomorphic context		1
134	17 Aug to 15 Oct 1993	60	1993-10-15	1990	1993	10	Green Island		1					1:1,000	3	All meadows	by foot, boat - diver (SCUBA + free)	1					1		1	17 August 1993, alt 914m	human observation, in situ point assessments	dGPS							1	1						1	1	spp, biomass	mdw boundaries ±5m	visual estimates	human digitised on-screen interpolation from in situ points (ArcGIS) and AP (17 August 1993) colour, texture, and the geomorphic context		1
135	17 Aug to 02 Sep 1994	17	1994-09-02	1990	1994	09	Green Island		1					1:1,000	3	All meadows	by foot, boat - diver (SCUBA + free)	1					1		4	28 June 1994, alt 914m	human observation, in situ point assessments	dGPS							1	1						1	1	spp, biomass	mdw boundaries ±5m	visual estimates	human on-screen digitising (ArcGIS), using in situ points and AP (28 June 1994) colour, texture, and the geomorphic context		1
136	August 1996		1996-08-31^	1990	1996	08	Green Island		1					1:1,000	3	All meadows	by foot, diver (free)	1									human observation, in situ point assessments	GPS							1	1					ND	1	1	presence	ND	presence	ND
137	20-28 October 1996	9	1996-10-28	1990	1996	10	Green Island		1					1:1,000	3	All meadows	ND										ND	ND							1	1					CS, SI, TH	1	1	presence	ND	presence	ND
138	15 Sep to 01 Oct 1997	18	1997-10-01	1990	1997	10	Green Island		1					1:1,000	3	All meadows	by foot, boat - diver (SCUBA + free)	1					1		2	Tasked, 17Oct97, alt 915m	human observation, in situ point assessments	dGPS							1	1						1	1	spp, biomass	mdw boundaries ±5m	visual estimates	human on-screen digitising (ArcGIS), using in situ points and AP (17Oct97) colour, texture, and the geomorphic context		1
139	08 Sep to 23 Oct 2003	47	2003-10-23	2000	2003	10	Green Island		1					1:1,000	3	All meadows	by foot, boat - diver (SCUBA + free)	1					1		7	18Aug2001, 1830mASL; 10Sep2005, 918mASL	human observation, in situ point assessments	GPS							1	1						1	1	spp, biomass	mdw boundaries ±5m	visual estimates	human on-screen digitising (ArcGIS), using in situ points and AP (18Aug01 + 10Sep05) colour, texture, and the geomorphic context		1
140	4–29 May & 29 June–02 July 2004	29	2004-07-02	2000	2004	07	Green Island		1					1:1,000	3	All meadows	by foot										human observation, in situ point assessments	ND							1	1					CR, CS, HO, HU, SI, TH	1	1	presence	ND	percent cover	ND
141	6 - 9 October 1995	4	1995-10-09	1990	1995	10	Lizard Island	1						1:10,000	3	All meadows	boat - diver (SCUBA + free)	1					1		3	23Nov95 altitude 4580m	human observation, in situ point assessments	GPS							1	1	1				CS, HC, HO, HS, HU, SI, TH	1	1	spp, density	mdw boundaries ±25m to ±100m	visual estimates & pct cover	human on-screen digitising (ArcGIS), using in situ points and AP (23 November 1995) colour, texture, and the geomorphic context		1
142	10-15 December 2011	5	2011-12-15	2010	2011	12	Lizard Island	1						1:10,000	3	All meadows	satellite; Boat - diver (free, SCUBA)	1						1	4	WorldView 2 satellite image (2 x 2 m pixel), October 2011	human observation, in situ photo transects & point assessments	GPS							1	1	1	1	1	1	CR, CS, HO, HS, HU, SI, ZC	1	1	spp, density	ND	percent cover	Object Based Image Analysis (OBIA) applied to a high spatial resolution satellite image
143	03-07 October 2012	5	2012-10-07	2010	2012	10	Lizard Island	1						1:10,000	3	All southern meadows	satellite; Boat - diver (free, SCUBA)	1						1			human observation, in situ photo transects & point assessments	GPS							1	1	1	1	1	1	CR, HO, HS, HU, TH, ZC	1	1	spp, density	ND	percent cover	Object Based Image Analysis (OBIA) applied to a high spatial resolution satellite image
144	16 July 1928 - 28 July 1929	377	1929-07-28	1920	1929	07	Low Isles		1					1:2,400	3	All benthic communities	by foot						1		2	28 Sep 1928, alt 2000ft	human observation, in situ point assessments	ND							1	1					HO, TH	1	1	spp	ND	presence	hand drawn, human interpretation from aerial photo aided by in situ points
145	29 July to 29 August 1997	32	1997-08-29	1990	1997	08	Low Isles		1					1:1,000	3	All meadows	by foot, boat - diver (free)	1					1		1	1:12,000 aerial photograph (26th August 1997, height 1830 m)	human observation, in situ point assessments	GPS; ±3m							1	1	1				CS, EA, HC, HD, HO, HT, HU, TH	1	1	spp, density	mdw boundaries ±3m to ±50m	visual estimates & pct cover	human on-screen digitising (MapInfo), using in situ points and AP (26th August 1997) colour, texture, and the geomorphic context		1
146	11 December 1994	1	1994-12-11	1990	1994	12	Sherrand Reef	1						1:10,000	2	All meadows	by foot, boat - diver (free)	1					1		8	18 August 1972, alt 25,000'	human observation, in situ point assessments	GPS							1	1					TH		1	spp, density	ND	visual estimates & pct cover	human digitised on-screen interpolation from in situ points + aided by AP (MapInfo)		1
147	11 December 1994	1	1994-12-11	1990	1994	12	Sand Bank No 8	1						1:10,000	2	All meadows	by foot, boat - diver (free)	1					1		8	18 August 1972, alt 25,000'	human observation, in situ point assessments	GPS							1	1					TH		1	spp, density	ND	visual estimates & pct cover	human digitised on-screen interpolation from in situ points + aided by AP (MapInfo)		1
148	27 November 1994	1	1994-11-27	1990	1994	11	Blanchard Reef	1						1:10,000	2	All meadows	by foot, boat - diver (free)	1					1		8	18 August 1972, alt 25,000'	human observation, in situ point assessments	GPS							1	1					HD, TH	1	1	spp, density	ND	visual estimates & pct cover	human digitised on-screen interpolation from in situ points + aided by AP (MapInfo)		1
149	28 November 1994	1	1994-11-28	1990	1994	11	no name (Reef 13-077)	1						1:10,000	2	All meadows	by foot, boat - diver (free)	1					1		8	18 August 1972, alt 25,000'	human observation, in situ point assessments	GPS							1	1					TH		1	spp, density	ND	visual estimates & pct cover	human digitised on-screen interpolation from in situ points + aided by AP (MapInfo)		1
150	10 December 1994	1	1994-12-10	1990	1994	12	Corbett Reef	1						1:10,000	3	All meadows	by foot, boat - diver (free)	1					1		8	17 August 1972, alt 25,000'	human observation, in situ point assessments	GPS							1	1					HO, HS, TH	1	1	spp, density	ND	visual estimates & pct cover	human digitised on-screen interpolation from in situ points + aided by AP (MapInfo)		1
151	09 December 1994	1	1994-12-09	1990	1994	12	Pipon Reef	1						1:10,000	2	All meadows	by foot, boat - diver (free)	1					1		8	17 August 1972, alt 25,000'	human observation, in situ point assessments	GPS							1	1					CR, EA, HO, HS, TH, ZC	1	1	spp, density	ND	visual estimates & pct cover	human digitised on-screen interpolation from in situ points + aided by AP (MapInfo)		1
152	07 December 1994	1	1994-12-07	1990	1994	12	Parke Reef	1						1:10,000	2	All meadows	by foot, boat - diver (free)	1					1		8	17 August 1972, alt 25,000'	human observation, in situ point assessments	GPS							1	1					HO	1	1	spp, density	ND	visual estimates & pct cover	human digitised on-screen interpolation from in situ points + aided by AP (MapInfo)		1
153	05 December 1994	1	1994-12-05	1990	1994	12	Martin Reef	1						1:10,000	2	All meadows	by foot, boat - diver (free)	1					1		8	17 August 1972, alt 25,000'	human observation, in situ point assessments	GPS							1	1					TH		1	spp, density	ND	visual estimates & pct cover	human digitised on-screen interpolation from in situ points + aided by AP (MapInfo)		1
154	30 April 2007	1	2007-04-30	2000	2007	04	Boulder Reef	1						1:10,000	2	All meadows	boat - diver (free), bathyscope, grab	1	1	1			1	1	7		human observation, in situ point assessments	GPS							1	1					CR	1	1	spp, density	ND	percent cover	human digitised on-screen interpolation from in situ points + aided by GE (ArcGIS)		1
155	04 Dec 2007	1	2007-12-04	2000	2007	12	Boulder Reef	1						1:10,000	2	All meadows	boat - diver (free), bathyscope, grab	1	1	1			1	1	7		human observation, in situ point assessments	GPS							1	1					CR	1	1	spp, density	ND	percent cover	human digitised on-screen interpolation from in situ points + aided by GE (ArcGIS)		1
156	16 Nov 2006	1	2006-11-16	2000	2006	11	Egret Reef	1						1:10,000	2	All meadows	boat - diver (free), bathyscope, grab	1	1	1			1	1	7		human observation, in situ point assessments	GPS							1	1					HO, HU	1	1	spp, density	ND	percent cover	human digitised on-screen interpolation from in situ points + aided by GE (ArcGIS)		1
157	31 Jan 2006	1	2006-01-31	2000	2006	01	Egret Reef	1						1:10,000	2	All meadows	boat - diver (free), bathyscope, grab	1	1	1			1	1	7		human observation, in situ point assessments	GPS							1	1					HO, HU	1	1	spp, density	ND	percent cover	human digitised on-screen interpolation from in situ points + aided by GE (ArcGIS)		1
158	24 January 2006	1	2006-01-24	2000	2006	01	Dawson Reef	1						1:10,000	2	All meadows	boat - diver (free), bathyscope, grab	1	1	1			1	1	7		human observation, in situ point assessments	GPS							1	1					CS/CS, HO	1	1	spp, density	ND	percent cover	human digitised on-screen interpolation from in situ points + aided by GE (ArcGIS)		1
159	09 & 18 Jan 2006	1	2006-01-18	2000	2006	01	Cowlishaw Reef	1						1:10,000	2	All meadows	boat - diver (free), bathyscope, grab	1	1	1			1	1	7		human observation, in situ point assessments	GPS							1	1					HO, HU	1	1	spp, density	ND	percent cover	human digitised on-screen interpolation from in situ points + aided by GE (ArcGIS)		1
160	24 Jan & 14 Feb 2009	2	2009-02-14	2000	2009	02	Cairns Reef	1						1:35,000	2	All meadows	boat - diver (free), bathyscope, grab	1	1	1			1	1	7	2.4m Spot	human observation, in situ point assessments	GPS							1	1					CR, HO, TH	1	1	spp, density	ND	percent cover	human digitised on-screen interpolation from in situ points + aided by GE (ArcGIS)		1
161	10 December 2004	1	2004-12-10	2000	2004	12	Archer Point	1						1:10,000	2	All meadows	by foot, boat - diver (free)	1							7	Google Earth	human observation, in situ point assessments	GPS				1	1		1	1					CS, CR, HO, HU, TH	1	1	spp, density	ND	percent cover	human digitised on-screen interpolation from in situ points + aided by GE (ArcGIS)		1
162	21 August 2007	1	2007-08021	2000	2007	08	Cape Bedford	1						1:10,000	3	All meadows	by foot, boat - diver (free)	1							7	Google Earth	human observation, in situ point assessments	GPS				1	1								HO, HU	1	1	spp, density	ND	percent cover	human digitised on-screen interpolation from in situ points + aided by GE (ArcGIS)		1
163	10 Nov & 10 Dec 2004	2	2004-12-10	2000	2004	12	Walker Bay	1						1:10,000	3	All meadows	boat - diver (free)	1							7	Google Earth	human observation, in situ point assessments	GPS				1	1								HU, HS, SI	1	1	spp, density	ND	percent cover	human digitised on-screen interpolation from in situ points + aided by GE (ArcGIS)		1
164	14 July 2007	1	2007-07-14	2000	2007	07	McIvor River to Cape Flattery	1						1:10,000	4	All meadows	by foot, boat - diver (free)	1							7	Google Earth	human observation, in situ point assessments	GPS				1	1								HO, HU	1	1	spp, density	ND	percent cover	human digitised on-screen interpolation from in situ points + aided by GE (ArcGIS)		1
165	02 Dec 2004 & 03 Feb 2005	64	2005-02-03	2000	2005	02	Sachs Spit to Indian Head	1						1:10,000	3	All meadows	by foot, boat - diver (free)	1							7	Google Earth	human observation, in situ point assessments	GPS				1	1								HO, HU	1	1	spp, density	ND	percent cover	human digitised on-screen interpolation from in situ points + aided by GE (ArcGIS)		1
166	18 May 2005		2005-03-18	2000	2005	03	Indian Head and south Cape Bedford	1						1:10,000	4	All meadows	by foot, boat - diver (free)	1							7	Google Earth	human observation, in situ point assessments	GPS				1	1								HO, HU	1	1	spp, density	ND	percent cover	human digitised on-screen interpolation from in situ points + aided by GE (ArcGIS)		1
167	05 July 2007	1	2007-07-05	2000	2007	07	Endeavour River/Cooktown	1						1:10,000	3	All meadows	by foot, boat - grab	1	1						7	Google Earth	human observation, in situ point assessments	GPS	1	1		1	1								HO, HU, ZC	1	1	spp, density	ND	percent cover	human digitised on-screen interpolation from in situ points + aided by GE (ArcGIS)		1
168	09 Nov 2004 & 08 May 2005	2	2005-05-08	2000	2005	05	Endeavour River/Cooktown	1						1:10,000	3	All meadows	by foot, boat - grab	1	1						7	Google Earth	human observation, in situ point assessments	GPS	1	1		1	1								HO, HU, ZC	1	1	spp, density	ND	percent cover	human digitised on-screen interpolation from in situ points + aided by GE (ArcGIS)		1
169	17-21 March 2007	5	2007-03-21	2000	2007	03	Lucinda to Bowling Green Bay			1				1:50,000	6	All meadows	Aircraft - helicopter	1									human observation, in situ point assessments	GPS				1									CS, HO, HU, ZC	1	1	spp, density	mdw boundaries ±5m to ±15m	modified visual estimates of biomass	human digitised on-screen interpolation from in situ points (Arc GIS)		1
170	11 March 1994	1	1994-03-11	1990	1994	03	Meunga Creek to Oyster Point		1					1:50,000	3	Selected locations	boat - diver (free)	1									human observation, in situ point assessments	GPS				1	1								HO, HP, HU	1	1	ND	ND	percent cover	ND
171	27-29 September 1994	3	1994-09-29	1990	1994	09	Oyster Point, Hinchinbrook		1					1:10,000	3	All meadows	boat - diver (free)	1					1		8	1 August 1991, altitude 1830m; 10 July 1992, alt F120m	human observation, in situ point assessments	dGPS; ±3.6m				1	1								HD, HO, HP, HT, HU	1	1	spp, density	ND	percent cover	human digitised on-screen interpolation from in situ points + aided by AP (MapInfo)		1
172	13 - 15 November 1995	3	1995-11-15	1990	1995	11	Oyster Point, Hinchinbrook		1					1:10,000	3	All meadows	boat - diver (free)	1									human observation, in situ point assessments	dGPS; ±1.5m				1	1								HD, HO, HP, HS, HT, HU	1	1	spp, density	mdw boundaries ±10m	visual estimates of biomass	human digitised on-screen interpolation from in situ points (MapInfo)		1
173	4 - 7 August 1996	4	1996-08-07	1990	1996	08	Oyster Point, Hinchinbrook		1					1:10,000	3	All meadows	boat - diver (free)	1									human observation, in situ point assessments	dGPS; ±1.5m				1	1								HD, HO, HP, HT, HU	1	1	spp, density	mdw boundaries ±10m	visual estimates of biomass	human digitised on-screen interpolation from in situ points (MapInfo)		1
174	18 – 20 December, 1997	3	1997-12-20	1990	1997	12	Oyster Point, Hinchinbrook (4km shoreline)		1					1:10,000	3	All meadows	boat - diver (free)	1									human observation, in situ point assessments	dGPS; ±1.5m				1	1								HD, HO, HP, HS, HU	1	1	spp, density	mdw boundaries ±10m	visual estimates of biomass	human digitised on-screen interpolation from in situ points (MapInfo)		1
175	24 –27 November, 1998	4	1998-11-27	1990	1998	11	Oyster Point, Hinchinbrook (4km shoreline)		1					1:10,000	3	All meadows	boat - diver (free)	1									human observation, in situ point assessments	dGPS; ±1.5m				1	1								HD, HO, HP, HS, HU	1	1	spp, density	mdw boundaries ±10m	visual estimates of biomass	human digitised on-screen interpolation from in situ points (MapInfo)		1
176	13 –15 December, 1999	3	1999-12-15	1990	1999	12	Oyster Point, Hinchinbrook (4km shoreline)		1					1:10,000	3	All meadows	boat - diver (free)	1									human observation, in situ point assessments	dGPS; ±1.5m				1	1								HD, HO, HP, HS, HU	1	1	spp, density	mdw boundaries ±10m	visual estimates of biomass	human digitised on-screen interpolation from in situ points (MapInfo)		1
177	09-11 Aug, 13- 20 Sep 1995	43	1995-09-20	1990	1995	09	Shoalwater Bay					1		1:10,000	5	All meadows	helicopter; boat - diver (free & SCUBA)	1					1	1	4	Landsat 5, 21Dec95	human observation, in situ point assessments	GPS; ±5m	1	1		1	1		1	1					CS, HD, HO, HP, HS, HU, SI, ZC	1	1	spp, density	mdw boundaries ±5m to ±30m	visual estimates & pct cover	human digitised on-screen interpolation from in situ points + aided by AP & SI (ArcInfo, MapInfo)		1
178	18-19 Mar, 3 - 11 Apr 1996	25	1996-04-11	1990	1996	04	Shoalwater Bay					1		1:10,000	5	All meadows	helicopter; boat - diver (free & SCUBA)	1					1	1	6	Landsat 5, 21Dec95	human observation, in situ point assessments	GPS; ±5m	1	1		1	1		1	1					CS, HD, HO, HP, HS, HU, SI, ZC	1	1	spp, density	mdw boundaries ±5m to ±30m	visual estimates & pct cover	human digitised on-screen interpolation from in situ points + aided by AP & SI (ArcInfo, MapInfo)		1
179	11- 18 December 1995	8	1995-12-18	1990	1995	12	Shoalwater Bay fringing reef habitats					1		1:10,000	3	All meadows	boat - diver (free)	1					1	1	7	Landsat 5, 21Dec95	human observation, in situ point assessments	GPS; ±5m							1	1					CS, HO, HU	1	1	spp, density	mdw boundaries ±5m to ±30m	percent cover	human digitised on-screen interpolation from in situ points + aided by AP & SI (ArcInfo, MapInfo)		1
180	17 April 1985	1	1985-04-17	1980	1985	04	Shoalwater Bay					1		1:250,000	5	All meadows	Spacecraft							1	8	astronaut orbital photo	NA	NA	1			1			1						NA	1	1	ND	84.3% accuracy	presence/absence, harvested biomass	simple supervised classification, based on 1995-1996 field surveys
181	22 Jun - 05 Jul 2002	14	2002-07-05	2000	2002	07	Shoalwater Bay					1		1:15,000; 30m	4	All meadows	By foot; boat - diver(free), surface observation	1		1				1	1	Landsat 7 ETM image (9:45 a.m. 29 June 2002)	human observation, in situ point assessments	GPS				1	1								HU, ZC	1	1	ND	ND	percent cover	Supervised classification of Landsat 7 (ArcView)
182	July 1992		1992-07-31^	1990	1992	07	Mission Beach to Bowen		1	1				1:50,000	6	All intertidal meadows	aircraft - fixed wing						1				human observation at altitude 150 m.	GPS				1									ND			ND	ND	presence/absence, harvested biomass	qualitatively assessment		1
183	28 August 2000	1	2000-08-28	2000	2000	08	Meunga Creek, Cardwell to Russel Island, Cape Bowling Green		1	1				1:50,000	3	All intertidal meadows	aircraft - fixed wing						1				human observation at altitude 150 m.	GPS				1									ND			ND	ND	presence/absence, harvested biomass	qualitatively assessment		1
184	08-15 January 1999	8	1999-01-15	1990	1999	01	Hydeaway Bay-Puritan Bay, Whitsunday Islands				1			1:10,000	5	All meadows	boat - diver (free)	1					1		6	09 June 1998, alt 4610	human observation, in situ point assessments	GPS; ±5m				1	1	1	1	1					CR, CS, HD, HO, HS, HT, HU, SI, TH, ZC	1	1	spp, density	mdw boundaries ±10m to ±100m	visual estimates of biomass	helicopter track & human digitised on-screen interpolation from in situ points and visual interpretation AP (MapInfo)	1	1
185	24-30 January 2000	7	2000-01-30	2000	2000	01	Repulse Bay-Midgeton				1			1:10,000	4	All intertidal meadows	boat - diver (free)	1					1		7	09 June 1998, alt 4610	human observation, in situ point assessments	GPS; ±5m				1	1								HD, HO, HS, HU, ZC	1	1	spp, density	mdw boundaries ±10m to ±100m	visual estimates of biomass	human on-screen interpolation from in situ points (MapInfo), human interpretation AP, helicopter tracks 15 April 2000		1
186	June 1952		1952-06-30^	1950	1952	06	Cairns Harbour		1					1:250,000	3	All meadows	aerial photo - Nadir						1		8		ND	ND				1	1								ND	1	1	ND	ND	presence/absence	hand drawn, human interpretation from aerial photo
187	25 August 1952	1	1952-08-25	1950	1952	08	Ellie Point (Cairns Harbour)		1					1:25,000	2	All meadows	aerial photo - Nadir						1		8		ND	ND				1	1								ND	1	1	ND	ND	presence/absence	hand drawn, human interpretation from aerial photo
188	17 September 1965	1	1965-09-17	1960	1965	09	Ellie Point (Cairns Harbour)		1					1:25,000	2	All meadows	aerial photo - Nadir						1		8		ND	ND				1	1								ND	1	1	ND	ND	presence/absence	hand drawn, human interpretation from aerial photo
189	13 August 1971	1	1971-08-13	1970	1971	08	Cairns Harbour		1					1:12,000	3	All meadows	aerial photo - Nadir						1		8		ND	ND				1	1								ND	1	1	ND	ND	presence/absence	hand drawn, human interpretation from aerial photo
190	22 September 1974	1	1974-09-22	1970	1974	09	Cairns Harbour		1					1:12,000	3	All meadows	aerial photo - Nadir						1		8		ND	ND				1	1								ND	1	1	ND	ND	presence/absence	hand drawn, human interpretation from aerial photo
191	19 October 1979	1	1979-10-19	1970	1979	10	Cairns Harbour		1					1:12,000	3	All meadows	aerial photo - Nadir						1		8	BPA run 40, 1830m	ND	ND				1	1								ND	1	1	ND	ND	presence/absence	hand drawn, human interpretation from aerial photo
192	27 June 1983	1	1983-07-31^	1980	1983	07	Cairns Harbour		1					1:12,000	3	All meadows	aerial photo - Nadir						1		8	BPA run 40, 1830m	ND	ND				1	1								ND	1	1	ND	ND	presence/absence	hand drawn, human interpretation from aerial photo
193	17 July 1987	1	1987-07-31^	1980	1987	07	Cairns Harbour		1					1:12,000	3	All meadows	aerial photo - Nadir						1		3	BPA run 40, 1830m	in situ Feb-Mar 1988	ND				1	1								ND	1	1	ND	ND	presence/absence	hand drawn, human interpretation from aerial photo
194	17 August 1987	1	1987-08-17	1980	1987	08	Ellie Point (Cairns Harbour)		1					1:12,000	2	All meadows/patches	aerial photo - Nadir						1		7		ND	ND				1	1								ZC, CS, HU, HO		1	ND	mdw boundaries ±5m	presence/absence	hand drawn, human interpretation from aerial photo
195	15 October 1987	1	1987-10-15	1980	1987	10	Mission Bay		1					1:10,000	3	All meadows	boat - diver (free)	1									in situ point assessments	RADAR & variable range marker				1	1											ND	ND	presence/absence, harvested biomass	hand drawn on marine chart, interpolated from in situ point		1
196	11 Feb 1988 to 04 Mar 1988	25	1988-03-04	1980	1988	03	Cairns Harbour		1					1:1,000	3	All meadows	boat - diver (free)	1									in situ point assessments	RADAR & variable range marker				1	1								HD, CR, TH, HU, CS, HP, HO, TH, ZC	1	1	ND	ND	presence/absence, harvested biomass	hand drawn on marine chart, interpolated from in situ point		1
197	12 March 1990	1	1990-03-12	1990	1990	03	Ellie Point (Cairns Harbour)		1					1:1,000	2	All meadows	aerial photo - Nadir						1	1	7	BPA run 40, 12 March 1990, 1830m	in situ October 1988 (see McKenzie (1994))	ND				1	1									1	1	ND	mdw boundaries ±5m	presence/absence, harvested biomass	hand drawn, human interpretation from aerial photo
198	31 July 1991	1	1991-07-31	1990	1991	07	Ellie Point (Cairns Harbour)		1					1:12,000	2	All meadows	boat, by foot, June 1991	1					1		3	BPA run 40, 1830m	in situ June 1991 (see Coles et al (1990))	GPS				1	1									1	1	ND	mdw boundaries ±5m	presence/absence, harvested biomass	hand drawn, human interpretation from aerial photo
199	31 August 1991	1	1991-08-13	1990	1991	08	Ellie Point (Cairns Harbour)		1					1:1,000	2	All meadows/patches	boat, by foot, June 1991	1					1		3	BPA run 40, 1830m	human observation, in situ point assessments	GPS				1	1								ZC, CS, HU, HO		1	ND	mdw boundaries ±5m	presence/absence, harvested biomass	hand drawn, human interpretation from aerial photo
200	6-8 December 1993	3	1993-12-08	1990	1993	12	Cairns Harbour		1					1:1,000	3	All meadows/patches	boat - diver (free)	1					1		7		human observation, in situ point assessments	ndGPS	1	1		1	1	1							HO, HD, CS, HU, HP, ZC	1	1		survey point (± 25m) and digitising errors (± 25m)	percent cover	human digitised on-screen interpolation from in situ points + aided by AP (MapInfo)		1
201	13 July 1994	1	1994-07-13	1990	1994	07	Ellie Point (Cairns Harbour)		1					1:12,000	2	All meadows	aerial photo - Nadir						1					ND				1	1								ND	1	1	ND	mdw boundaries ±5m	presence/absence, harvested biomass	hand drawn, human interpretation from aerial photo
202	08-17 May 1996	10	1996-05-17	1990	1996	05	Cairns Harbour		1					1:800	3	3 selected meadows	Acoustic; boat - diver (free)	1			1						human observation, in situ point assessments	dGPS				1	1								CS, HO, HP, HU, ZC	1	1	spp, density	mdw boundaries ±10m	visual estimates of biomass	human digitised on-screen interpolation from in situ points (MapInfo)		1
203	01 July 1996	1	1996-07-01	1990	1996	07	Ellie Point (Cairns Harbour)		1					1:12,000	2	All meadows	aerial photo - Nadir						1					ND				1	1								ND	1	1	ND	mdw boundaries ±5m	presence/absence, harvested biomass	hand drawn, human interpretation from aerial photo
204	04 December 1996	1	1996-12-04	1990	1996	12	Ellie Point (Cairns Harbour)		1					1:1,000	2	All meadows/patches	boat - camera, grab		1	1			1		8		in situ human observation + point assessments	dGPS				1	1								CS, ZC	1			mdw boundaries ±2.5m to ±50m	visual estimates of biomass	human digitised on-screen interpolation from in situ points + aided by AP (MapInfo)		1
205	09 August 1998	1	1998-08-09	1990	1998	08	Ellie Point (Cairns Harbour)		1					1:25,000	2	All meadows/patches	aerial photo - Nadir						1		7			ND				1	1								ND	1	1	ND	mdw boundaries ±5m	presence/absence, harvested biomass	hand drawn, human interpretation from aerial photo
206	13 November - 07 December 2001	26	2001-12-07	2000	2001	12	Cairns Harbour		1					1:10,000	3	All meadows	helicopter; boat - diver (free), camera	1		1			1		5	09 August 1998, 1:25000;18 August 2001, 1:12000	in situ human observation + point assessments	dGPS	1	1		1	1								CR, CS, HD, HO, HU, ZC	1	1	categorised meadow-scape	mdw boundaries ±1m to ±100m	modified visual estimates of biomass	helicopter track & interpolated from in situ point. Visually aided by AP.	1	1
207	5-6 Dec 2002 to 13 Jan 2003	40	2003-01-13	2000	2003	01	Cairns Harbour		1					1:10,000	3	6 selected meadows	helicopter; boat - diver (free)	1					1		7		in situ human observation + point assessments	dGPS	1	1		1	1								CR, HD, HO, HU, ZC		1	categorised meadow-scape	mdw boundaries ±5m to ±100m	modified visual estimates of biomass	helicopter track & human digitised on-screen interpolation from in situ points	1	1
208	22 Nov - 4-5 Dec 2003	15	2003-12-05	2000	2003	12	Cairns Harbour		1					1:10,000	3	5 selected meadows	helicopter; boat - diver (free), camera	1		1			1		7		in situ human observation + point assessments	dGPS	1	1		1	1								CR, CS, HD, HO, HU, ZC		1	categorised meadow-scape	mdw boundaries ±5m to ±100m	modified visual estimates of biomass	helicopter track & human digitised on-screen interpolation from in situ points	1	1
209	11 Nov - 01-02 Dec 2004	23	2004-12-02	2000	2004	12	Cairns Harbour		1					1:10,000	3	5 selected meadows	helicopter; boat - diver (free), camera	1		1			1		7		in situ human observation + point assessments	dGPS	1	1		1	1								CR, CS, HD, HO, HU, ZC		1	categorised meadow-scape	mdw boundaries ±5m to ±100m	modified visual estimates of biomass	helicopter track & human digitised on-screen interpolation from in situ points	1	1
210	11 Nov, 16 Nov, 08 Dec 2005	29	2005-12-08	2000	2005	12	Cairns Harbour		1					1:10,000	3	5 selected meadows	helicopter; boat - diver (free), camera	1		1			1		7		in situ human observation + point assessments	dGPS	1	1		1	1								CR, CS, HD, HO, HU, ZC		1	categorised meadow-scape	mdw boundaries ±2m to ±50m	modified visual estimates of biomass	helicopter track & human digitised on-screen interpolation from in situ points	1	1
211	02 November - 5 December 2006	33	2006-12-05	2000	2006	12	Cairns Harbour		1					1:10,000	3	5 selected meadows	helicopter; boat - camera, sled??	1	1	1			1		7		human observation, in situ point assessments	dGPS	1	1		1	1								CS, HO, HU, ZC		1	categorised meadow-scape	mdw boundaries ±5m to ±50m	modified visual estimates of biomass	helicopter track & human digitised on-screen interpolation from in situ points	1	1
212	08 October - 26 November 2007	49	2007-11-26	2000	2007	11	Cairns Harbour		1					1:10,000	3	5 selected meadows	helicopter; boat - camera, sled??	1	1	1			1		7		human observation, in situ point assessments	dGPS	1	1		1	1								CS, HD, HO, HU, ZC		1	categorised meadow-scape	mdw boundaries ±5m to ±50m	modified visual estimates of biomass	helicopter track & human digitised on-screen interpolation from in situ points	1	1
213	15 October - 02 December 2008	49	2008-12-02	2000	2008	12	Cairns Harbour		1					1:10,000	3	5 selected meadows	helicopter; boat - camera, sled??	1	1	1			1		7		human observation, in situ point assessments	GPS; ±5m	1	1		1	1								CS, HD, HO, HU, ZC		1	categorised meadow-scape	mdw boundaries ±5m to ±20m	modified visual estimates of biomass	helicopter track & human digitised on-screen interpolation from in situ points	1	1
214	15 October - 27 December 2009	74	2009-10-16	2000	2009	10	Cairns Harbour		1					1:10,000	3	6 selected meadows	helicopter, boat - camera	1		1			1		7		human observation, in situ point assessments	GPS; ±5m	1	1		1	1								CS, HD, HO, HU, ZC		1	categorised meadow-scape	mdw boundaries ±10m to ±15m	modified visual estimates of biomass	helicopter track & human digitised on-screen interpolation from in situ points	1	1
215	07 October - 14 December 2010	69	2010-12-14	2010	2010	12	Cairns Harbour		1					1:10,000	3	6 selected meadows	helicopter, boat - camera	1		1			1		7		human observation, in situ point assessments	GPS; ±5m	1	1		1	1								CS, HD, HO, HU, ZC		1	categorised meadow-scape	mdw boundaries ±10m to ±15m	modified visual estimates of biomass	helicopter track & human digitised on-screen interpolation from in situ points	1	1
216	27-28 Sep - 13,17 Oct 2011	22	2011-10-17	2010	2011	10	Cairns Harbour		1					1:10,000	3	6 selected meadows	helicopter, boat - camera	1		1			1		7		human observation, in situ point assessments	GPS; ±5m	1	1		1	1								HD, HO, HU, ZC		1	categorised meadow-scape	mdw boundaries ±20m to ±50m	modified visual estimates of biomass	helicopter track & human digitised on-screen interpolation from in situ points	1	1
217	13 Oct - 02 Nov 2012, 10-16 Jan 2013	96	2013-01-16	2010	2013	01	Cairns Harbour		1					1:10,000	3	All meadows	helicopter; boat - camera, sled	1	1	1			1		7		human observation, in situ point assessments	GPS; ±5m	1	1		1	1	1							HD, HO, HU, ZC	1	1	categorised meadow-scape	mdw boundaries ±3m to ±200m	modified visual estimates of biomass	helicopter track & human digitised on-screen interpolation from in situ points	1	1
218	17 Oct, 20-22 Nov, 17 Dec 2013	62	2013-12-17	2010	2013	12	Cairns Harbour		1					1:10,000	3	6 selected meadows	helicopter; boat - camera, sled	1	1	1			1	1	7		human observation, in situ point assessments	GPS; ±5m	1	1		1	1	1							CS, HD, HO, HU, ZC	1	1	categorised meadow-scape	mdw boundaries ±3-20m and ±50m	modified visual estimates of biomass	helicopter track & human digitised on-screen interpolation from in situ points + interpretation SI	1	1
219	13-14 December 2013	2	2013-12-14	2010	2013	12	Double Island and Rocky Island		1					1:12,000	2	All benthic communities	Boat - diver (SCUBA)	1							6	2013 Spot; Google Earth	human observation, in situ photo transects & point assessments	GPS							1	1					CS, HO, HU, SI	1	1	spp, density	ND	percent cover (coral point count)	human digitised on-screen interpolation from in situ points + aided by AP (MapInfo)		1
220	03 Nov, 01-05 Dec 2014	33	2014-12-05	2010	2014	12	Cairns Harbour		1					1:10,000	3	6 selected meadows	helicopter; boat - camera, grab	1	1	1			1		7		human observation, in situ point assessments	GPS; ±5m	1	1		1	1								HD, HO, HU, ZC		1	categorised meadow-scape	mdw boundaries ±3m to ±50m	modified visual estimates of biomass	helicopter track & human digitised on-screen interpolation from in situ points (ArcGIS)	1	1
221	September - December 2015		2015-12-31^	2010	2015	12	Cairns Harbour		1					1:10,000	3	All meadows	helicopter; boat - camera, grab	1	1	1			1		7		human observation, in situ point assessments	GPS; ±5m	1	1		1	1	1							CS, HD, HO, HU, ZC	1	1	categorised meadow-scape	mdw boundaries ±2m to ±50m	modified visual estimates of biomass	helicopter track & human digitised on-screen interpolation from in situ points (ArcGIS)	1	1
222	September - December 2016		2016-12-31^	2010	2016	12	Cairns Harbour		1					1:10,000	3	8 selected meadows	helicopter; boat - camera, grab	1	1	1			1		7		human observation, in situ point assessments	GPS; ±5m	1	1		1	1								CS, HD, HO, HU, ZC		1	categorised meadow-scape	mdw boundaries ±2m to ±50m	modified visual estimates of biomass	helicopter track & human digitised on-screen interpolation from in situ points (ArcGIS)	1	1
223	October - November 2017		2017-11-30^	2010	2017	11	Cairns Harbour		1					1:10,000	3	6 selected meadows	helicopter; boat - camera, grab	1	1	1			1		7		human observation, in situ point assessments	GPS; ±5m	1	1		1	1								CS, HD, HO, HU, ZC		1	categorised meadow-scape	mdw boundaries ±1m to ±50m	modified visual estimates of biomass	helicopter track & human digitised on-screen interpolation from in situ points (ArcGIS)	1	1
224	7-9 October, 4–6 December 2018	61	2018-12-06	2010	2018	12	Cairns Harbour		1					1:10,000	3	All meadows	helicopter; boat - camera, grab	1	1	1				1	7		human observation, in situ point assessments	GPS; ±5m	1	1		1	1	1							CS, HD, HO, HU, ZC	1	1	categorised meadow-scape	mdw boundaries <1m to ±50m	modified visual estimates of biomass	helicopter track & human digitised on-screen interpolation from in situ points (ArcGIS)	1	1
225	March 2019		2019-03-31^	2010	2019	03	Cairns Harbour		1					1:10,000	3	3 selected meadows	helicopter; boat - camera, grab	1	1	1				1	7		human observation, in situ point assessments	GPS; ±5m	1	1		1	1								CS, HD, HO, HU, ZC		1	categorised meadow-scape	mdw boundaries <1m to ±50m	modified visual estimates of biomass	helicopter track & human digitised on-screen interpolation from in situ points (ArcGIS)	1	1
226	July 2019		2019-07031^	2010	2019	07	Cairns Harbour		1					1:10,000	3	3 selected meadows	helicopter; boat - camera, grab	1	1	1				1	7		human observation, in situ point assessments	GPS; ±5m	1	1		1	1								CS, HD, HO, HU, ZC		1	categorised meadow-scape	mdw boundaries <1m to ±50m	modified visual estimates of biomass	helicopter track & human digitised on-screen interpolation from in situ points (ArcGIS)	1	1
227	October 2019		2019-10-31^	2010	2019	10	Cairns Harbour		1					1:10,000	3	6 selected meadows	helicopter; boat - camera, grab	1	1	1				1	7		human observation, in situ point assessments	GPS; ±5m	1	1		1	1								CS, HD, HO, HU, ZC		1	categorised meadow-scape	mdw boundaries <1m to ±50m	modified visual estimates of biomass	helicopter track & human digitised on-screen interpolation from in situ points (ArcGIS)	1	1
228	November 2019		2019-11-30^	2010	2019	11	Cairns Harbour		1					1:10,000	3	6 selected meadows	helicopter; boat - camera, grab	1	1	1				1	7		human observation, in situ point assessments	GPS; ±5m	1	1		1	1								CS, HD, HO, HU, ZC		1	categorised meadow-scape	mdw boundaries <1m to ±50m	modified visual estimates of biomass	helicopter track & human digitised on-screen interpolation from in situ points (ArcGIS)	1	1
229	October - November 2020		2020-11-30^	2020	2020	11	Cairns Harbour		1					1:10,000	3	All meadows	helicopter; boat - camera, grab	1	1	1				1	8	Landsat 2018	human observation, in situ point assessments		1	1		1	1								CS, HD, HO, HU, ZC		1	categorised meadow-scape	mdw boundaries <1m to ±50m	modified visual estimates of biomass	helicopter track & human digitised on-screen interpolation from in situ points (ArcGIS)	1	1
230	04-07 Oct, 04-06 Dec 2002	63	2002-12-06	2000	2002	12	Port Curtis and Rodds Bay					1	1	1:10,000	4	All meadows	helicopter; boat - diver (free), camera sled, grab	1	1	1			1		7		human observation & on-screen assessments, in situ point	GPS; ±5m	1	1		1	1	1			1				HD, HM, HO, HS, HU, ZC	1	1	categorised meadow-scape	mdw boundaries ± ≤5m to ±500m	modified visual estimates of biomass	helicopter track & human digitised on-screen interpolation from in situ points (MapInfo)	1	1
231	25 October - 02 November 2004	8	2004-11-02	2000	2004	11	Port Curtis and Rodds Bay					1	1	1:10,000	4	13 selected meadows	helicopter; boat - diver (free)	1					1		7		human observation, in situ point assessments	GPS; ±5m	1	1		1	1								HD, HO, HU, ZC		1	spp, density	mdw boundaries ± ≤5m to ±20m	modified visual estimates of biomass	helicopter track & human digitised on-screen interpolation from in situ points (MapInfo)	1	1
232	14-20 October 2005	6	2005-10-20	2000	2005	10	Port Curtis and Rodds Bay					1	1	1:10,000	4	13 selected meadows	helicopter; boat - diver (free)	1					1		7		human observation, in situ point assessments	GPS; ±5m	1	1		1	1								HD, HO, HU, ZC		1	categorised meadow-scape	mdw boundaries ± ≤5m to ±20m	modified visual estimates of biomass	helicopter track & human digitised on-screen interpolation from in situ points (MapInfo)	1	1
233	04-10 November 2006	6	2006-11-10	2000	2006	11	Port Curtis and Rodds Bay					1	1	1:10,000	4	13 selected meadows	helicopter; boat - diver (free)	1					1		7		human observation, in situ point assessments	GPS; ±5m	1	1		1	1								HD, HO, HS, HU, ZC		1	categorised meadow-scape	mdw boundaries ± ≤5m to ±20m	modified visual estimates of biomass	helicopter track & human digitised on-screen interpolation from in situ points (MapInfo)	1	1
234	25-28 October 2007	3	2007-10-28	2000	2007	10	Port Curtis and Rodds Bay					1	1	1:10,000	4	13 selected meadows	helicopter; boat - diver (free)	1					1		8		human observation, in situ point assessments	dGPS; ±1.5m	1	1		1	1								HD, HO, HS, HU, ZC		1	categorised meadow-scape	mdw boundaries ± ≤5m to ±20m	modified visual estimates of biomass	helicopter track & human digitised on-screen interpolation from in situ points (GIS)	1	1
235	12-16 November 2008	4	2008-11-16	2000	2008	11	Port Curtis and Rodds Bay					1	1	1:10,000	4	13 selected meadows	helicopter; boat - diver (free)	1					1		7		human observation, in situ point assessments	dGPS; ±1.5m	1	1		1	1								HD, HO, HS, HU, ZC		1	categorised meadow-scape	mdw boundaries ± ≤5m to ±20m	modified visual estimates of biomass	helicopter track & human digitised on-screen interpolation from in situ points (GIS)	1	1
236	01-15 November 2009	14	2009-11-15	2000	2009	11	Port Curtis and Rodds Bay					1	1	1:10,000	4	All meadows	helicopter; boat - diver (free), camera sled, grab	1	1	1			1		7		human observation & on-screen assessments, in situ point	GPS; ±1.5m	1	1		1	1	1			1				CR, HD, HO, HS, HU, ZC	1	1	categorised meadow-scape	mdw boundaries ≤5m to ±300m	modified visual estimates of biomass	helicopter track & human digitised on-screen interpolation from in situ points (GIS)	1	1
237	03-09 November 2010	6	2010-11-09	2010	2010	11	Port Curtis and Rodds Bay					1	1	1:10,000	4	Western Basin + selected meadows	helicopter; boat - diver (free), camera, sled	1	1	1				1	7		human observation & on-screen assessments, in situ point	GPS	1	1		1	1								CR, HD, HO, HU, ZC	1	1	categorised meadow-scape	mdw boundaries ≤5m to ±100m	modified visual estimates of biomass	helicopter track & human digitised on-screen interpolation from in situ points (ArcGIS)	1	1
238	22-28 November 2011	6	2011-11-28	2010	2011	11	Port Curtis and Rodds Bay					1	1	1:10,000	4	Western Basin + selected meadows	helicopter; boat - diver (free)	1					1		7		human observation, in situ point assessments	GPS	1	1		1	1								HD, HO, HS, HU, ZC	1	1	categorised meadow-scape	mdw boundaries ≤5m to ±100m	modified visual estimates of biomass	helicopter track & human digitised on-screen interpolation from in situ points (ArcGIS)	1	1
239	2-7 June 2012	5	2012-06-07	2010	2012	06	Port Curtis and Rodds Bay					1	1	1:10,000	4	Western Basin + selected meadows	helicopter; boat - diver (free)	1					1		7		human observation, in situ point assessments	GPS	1	1		1	1								HD, HO, HS, HU, ZC	1	1	categorised meadow-scape	mdw boundaries ±5m to ±100m	modified visual estimates of biomass	helicopter track & human digitised on-screen interpolation from in situ points (ArcGIS)	1	1
240	16 August 1990	1	1990-08-16	1990	1990	8	Port Curtis					1		1:10,000	2	All meadows	historic boat - diver (free)							1	8	Landsat 5 TM	human observation, in situ point assessments from Rasheed et al. (2003)		1	1		1	1								ND	1	1	presence	ND	presence/absence	simple supervised classification, based on 2002 field surveys
241	07 March 1995	1	1995-03-07	1990	1995	3	Port Curtis					1		1:10,000	2	All meadows	historic boat - diver (free)							1	8	Landsat 5 TM	human observation, in situ point assessments from Rasheed et al. (2003)		1	1		1	1								ND	1	1	presence	ND	presence/absence	simple supervised classification, based on 2002 field surveys
242	12-17 November 2012	5	2012-11-17	2010	2012	11	Port Curtis and Rodds Bay					1	1	1:10,000	4	Western Basin + selected meadows	helicopter; boat - diver (free)	1					1		7		human observation, in situ point assessments	GPS	1	1		1	1								HD, HO, HS, HU, ZC	1	1	categorised meadow-scape	mdw boundaries ±5m to ±100m	modified visual estimates of biomass	helicopter track & human digitised on-screen interpolation from in situ points (ArcGIS)	1	1
243	21-27 June 2013	6	2013-06-27	2010	2013	06	Port Curtis and Rodds Bay					1	1	1:10,000	4	Western Basin + selected meadows	helicopter; boat - diver (free), grab	1	1				1		7		human observation, in situ point assessments	GPS	1	1		1	1								HD, HO, HS, HU, ZC	1	1	categorised meadow-scape	mdw boundaries ±3m to ±100m	modified visual estimates of biomass	helicopter track & human digitised on-screen interpolation from in situ points (ArcGIS)	1	1
244	02 Nov - 06 Dec 2013	34	2013-12-06	2010	2013	12	Port Curtis and Rodds Bay					1	1	1:10,000	4	All meadows	helicopter; boat - diver (free), sled, grab	1	1				1		7		human observation & on-screen assessments, in situ point	GPS	1	1		1	1	1			1				HD, HO, HS, HU, ZC	1	1	categorised meadow-scape	mdw boundaries ±3m to ±750m	modified visual estimates of biomass	helicopter track & human digitised on-screen interpolation from in situ points (ArcGIS)	1	1
245	10‐15 June 2014	5	2014-06-15	2010	2014	06	Port Curtis and Rodds Bay					1	1	1:10,000	4	Western Basin + selected meadows	helicopter; boat - diver (free), grab	1	1				1		7		human observation, in situ point assessments	GPS	1	1		1	1								HD, HO, HS, HU, ZC	1	1	categorised meadow-scape	mdw boundaries ±5m to ±750m	modified visual estimates of biomass	helicopter track & human digitised on-screen interpolation from in situ points (ArcGIS)	1	1
246	4‐10 November 2014	6	2014-11-10	2010	2014	11	Port Curtis and Rodds Bay					1	1	1:10,000	4	All meadows	helicopter; boat - diver (free), sled, grab	1	1				1		7		human observation & on-screen assessments, in situ point	GPS	1	1		1	1	1			1				HD, HO, HS, HU, ZC	1	1	categorised meadow-scape	mdw boundaries ±5m to ±750m	modified visual estimates of biomass	helicopter track & human digitised on-screen interpolation from in situ points (ArcGIS)	1	1
247	23–28 November 2015	5	2015-11-28	2010	2015	11	Port Curtis and Rodds Bay					1	1	1:10,000	4	Western Basin + selected meadows	helicopter; boat - diver (free), grab	1	1				1		7		human observation, in situ point assessments	GPS	1	1		1	1								HD, HO, HS, HU, ZC	1	1	categorised meadow-scape	mdw boundaries ≤5m to ±50m	modified visual estimates of biomass	helicopter track & human digitised on-screen interpolation from in situ points (ArcGIS)	1	1
248	12–18 November 2016	6	2016-11-18	2010	2016	11	Port Curtis and Rodds Bay					1	1	1:10,000	4	Western Basin + selected meadows	helicopter; boat - diver (free), grab	1	1				1		7		human observation, in situ point assessments	GPS	1	1		1	1								HD, HO, HS, HU, ZC	1	1	categorised meadow-scape	mdw boundaries ≤5m to ±100m	modified visual estimates of biomass	helicopter track & human digitised on-screen interpolation from in situ points (ArcGIS)	1	1
249	2–9 November 2017	7	2017-11-09	2010	2017	11	Port Curtis and Rodds Bay					1	1	1:10,000	4	Western Basin + selected meadows	helicopter; boat - diver (free)	1					1		7		human observation, in situ point assessments	GPS	1	1		1	1								HD, HO, HS, HU, ZC	1	1	categorised meadow-scape	mdw boundaries <5m to ±100m	modified visual estimates of biomass	helicopter track & human digitised on-screen interpolation from in situ points (ArcGIS)	1	1
250	04–10 November 2018	6	2018-11-10	2010	2018	11	Port Curtis and Rodds Bay					1	1	1:10,000	4	Western Basin + selected meadows	helicopter; boat - camera, grab	1	1	1				1	7		human observation & on-screen assessments, in situ point	GPS	1	1		1	1								HD, HO, HS, HU, ZC	1	1	categorised meadow-scape	mdw boundaries ≤5m to ±50m	modified visual estimates of biomass	helicopter track & human digitised on-screen interpolation from in situ points (ArcGIS)	1	1
251	24 October–06 November 2019	14	2019-11-06	2010	2019	11	Port Curtis and Rodds Bay					1	1	1:10,000	4	All meadows	helicopter; boat - camera, grab	1	1	1				1	6	Landsat 2019	human observation & on-screen assessments, in situ point	GPS	1	1		1	1	1							HD, HO, HS, HU, ZC	1	1	categorised meadow-scape	mdw boundaries ≤5m to ±50m	modified visual estimates of biomass	helicopter track & human digitised on-screen interpolation from in situ points (ArcGIS)	1	1
252	25 October – 06 November 2020	13	2020-11-06	2020	2020	11	Port Curtis and Rodds Bay					1	1	1:10,000	4	Selected meadows	helicopter; boat - camera, grab	1	1	1				1	7		human observation & on-screen assessments, in situ point	GPS	1	1		1	1								HD, HO, HS, HU, ZC		1	categorised meadow-scape	mdw boundaries ≤5m to ±50m	modified visual estimates of biomass	helicopter track & human digitised on-screen interpolation from in situ points (ArcGIS)	1	1
253	1-4 and 20-21 February 2001	20	2001-02-21	2000	2001	02	Mackay Port limits				1			1:10,000	4	All meadows	boat - diver (free), camera, sled, grab	1	1	1			1		8		human observation, in situ point assessments					1	1	1	1	1					HD, HO, HU,	1	1	geomorphic sediment	mdw boundaries ±5m to ±500m	modified visual estimates of biomass	human digitised on-screen interpolation from in situ points (MapInfo)		1
254	16-19 July 2004	3	2004-07-19	2000	2004	07	Hay Point Port limits				1			1:50,000	4	deepwater AOI	boat - CCTV camera, sled, grab		1	1							on-screen assessments, in situ point	dGPS; ±5m					1	1							HD, HS	1	1	spp, density	mdw boundaries ±100m to ±300m	modified visual estimates of biomass	human digitised on-screen interpolation from in situ points (MapInfo)		1
255	01 December 2005	1	2005-12-01	2000	2005	12	Hay Point Port limits				1			1:50,000	4	deepwater AOI	boat - CCTV camera, sled, grab		1	1							on-screen assessments, in situ point	GPS; ±5m					1	1							HS		1	spp, density	mdw boundaries ±100m to ±300m	modified visual estimates of biomass	human digitised on-screen interpolation from in situ points (ArcGIS)		1
256	17-22 October 2010	5	2010-10-22	2010	2010	10	Mackay-Hay Point Region				1			1:10,000	4	deepwater + shallow AOI	boat - camera, sled, grab		1	1							on-screen assessments, in situ point	GPS; ±5m				1	1	1							HD, HO, HU	1	1	spp, density	mdw boundaries ±5m to ±300m	modified visual estimates of biomass	human digitised on-screen interpolation from in situ points (ArcGIS)		1
257	14-18 November 2011	4	2011-11-18	2010	2011	11	Mackay-Hay Point Region				1			1:10,000	4	deepwater + shallow AOI	boat - camera, sled, grab		1	1							on-screen assessments, in situ point	GPS; ±5m				1	1	1							HD, HU		1	spp, density	mdw boundaries ±5m to ±300m	modified visual estimates of biomass	human digitised on-screen interpolation from in situ points (ArcGIS)		1
258	10 Oct - 23 Nov 2014	45	2014-11-23	2010	2014	11	Mackay-Hay Point Region				1			1:10,000	4	All meadows	boat - diver (free), camera, sled, grab	1	1	1							human observation & on-screen assessments, in situ point	GPS				1	1	1	1	1	1				HD, HO, HS, HU, ZC	1	1	categorised meadow-scape	mdw boundaries ±10m to ±500m	modified visual estimates of biomass	human digitised on-screen interpolation from in situ points (ArcGIS)		1
259	October 2015		2015-10-31^	2010	2015	10	Mackay-Hay Point Region				1			1:10,000	4	4 selected meadows	boat - diver (free), camera, sled, grab	1	1	1							human observation & on-screen assessments, in situ point	GPS				1	1		1	1	1				HD, HO, HS, HT, HU		1	categorised meadow-scape	mdw boundaries ±5m to ±50m	modified visual estimates of biomass	human digitised on-screen interpolation from in situ points (ArcGIS)		1
260	October/November 2016		2016-11-31^	2010	2016	11	Mackay-Hay Point Region				1			1:10,000	4	3 selected meadows	boat - diver (free), camera, grab	1	1	1							human observation & on-screen assessments, in situ point	GPS				1	1		1	1	1				HD, HO, HS, HT, HU		1	categorised meadow-scape	mdw boundaries ±10m to ±100m	modified visual estimates of biomass	human digitised on-screen interpolation from in situ points (ArcGIS)		1
261	October 2017		2017-10-31^	2010	2017	10	Mackay-Hay Point Region				1			1:10,000	4	All meadows	boat - diver (free), camera, grab	1	1	1							human observation & on-screen assessments, in situ point	GPS				1	1	1	1	1	1				HD, HO, HS, HT, HU	1	1	categorised meadow-scape	mdw boundaries ±20m to ±300m	modified visual estimates of biomass	human digitised on-screen interpolation from in situ points (ArcGIS)		1
262	October 2018		2018-10-31^	2010	2018	10	Mackay-Hay Point Region				1			1:10,000	4	6 selected meadows	by foot; boat - camera, grab	1	1	1							human observation & on-screen assessments, in situ point	GPS				1	1		1	1	1				HD, HO, HS, HT, HU, ZC		1	categorised meadow-scape	mdw boundaries ±5m to ±100m	modified visual estimates of biomass	human digitised on-screen interpolation from in situ points (ArcGIS)		1
263	October 2019		2019-10-31^	2010	2019	10	Mackay-Hay Point Region				1			1:10,000	4	6 selected meadows	by foot; boat - diver (free), camera, grab	1	1	1							human observation & on-screen assessments, in situ point	GPS				1	1		1	1	1				HD, HO, HS, HT, HU, ZC		1	categorised meadow-scape	mdw boundaries ±10m to ±100m	modified visual estimates of biomass	human digitised on-screen interpolation from in situ points (ArcGIS)		1
264	October 2020		2020-10-31^	2020	2020	10	Mackay-Hay Point Region				1			1:10,000	4	All meadows	by foot; boat - diving (free),camera, sled	1	1	1					7	Google Earth	human observation & on-screen assessments, in situ point	GPS				1	1	1	1	1	1				HD, HO, HS, HT, HU	1	1	categorised meadow-scape	mdw boundaries ±10m to ±100m	modified visual estimates of biomass	human digitised on-screen interpolation from in situ points (ArcGIS)		1
265	02-07 & 12-13 December 2002	12	2002-12-13	2000	2002	12	northern Abbot Bay			1				1:50,000	2	All meadows to 15m depth	boat - diver (free)	1									human observation, in situ point assessments	ND				1	1								HO, HS, HU	1	1	density	ND	shoot counts	ND
266	04–08 March 2005	4	2005-03-08	2000	2005	03	Abbot Point Port limits			1				1:10,000	4	All meadows	boat - diver (free), camera, sled, grab	1	1	1							human observation & on-screen assessments, in situ point	GPS; ±5m				1	1	1							CR, CS, HD, HO, HS, HU, SI, ZC	1	1	categorised meadow-scape	mdw boundaries ±20m to ±500m	modified visual estimates of biomass	human digitised on-screen interpolation from in situ points (MapInfo)		1
267	26 Feb + 26-27 Mar 2008	31	2008-03-27	2000	2008	03	Abbot Point Port limits			1				1:10,000	4	All meadows	boat - diver (free)	1									human observation, in situ point assessments	GPS				1	1	1							HO, HS, HU, SI, ZC	1	1	categorised meadow-scape	mdw boundaries ±10m to ±500m	modified visual estimates of biomass	human digitised on-screen interpolation from in situ points (ArcMap)		1
268	03 July 2008	1	2008-07-03	2000	2008	07	Abbot Point Port limits			1				1:10,000	3	4 selected meadows	boat - diver (free)	1									human observation, in situ point assessments	GPS				1	1	1							HU, ZC		1	categorised meadow-scape	mdw boundaries ±10m to ±20m	modified visual estimates of biomass	human digitised on-screen interpolation from in situ points (ArcMap)		1
269	04-18 September 2008	15	2008-09-18	2000	2008	09	Abbot Point Port limits			1				1:10,000	4	All meadows	boat - diver (free)	1									human observation, in situ point assessments	GPS				1	1	1							HD, HO, HS, HU, ZC	1	1	categorised meadow-scape	mdw boundaries ±10m to ±500m	modified visual estimates of biomass	human digitised on-screen interpolation from in situ points (ArcMap)		1
270	01 November 2008	1	2008-11-01	2000	2008	11	Abbot Point Port limits			1				1:10,000	3	5 selected meadows	boat - diver (free)	1									human observation, in situ point assessments	GPS				1	1	1							HO, HU, ZC		1	categorised meadow-scape	mdw boundaries ±10m to ±50m	modified visual estimates of biomass	human digitised on-screen interpolation from in situ points (ArcMap)		1
271	26 April 2009	1	2009-04-26	2000	2009	04	Abbot Point Port limits			1				1:10,000	3	3 selected meadows	boat - diver (free)	1									human observation, in situ point assessments	GPS				1	1	1							CR, CS, HD, HO, HS, HU, SI, ZC		1	categorised meadow-scape	mdw boundaries ±10m to ±500m	modified visual estimates of biomass	human digitised on-screen interpolation from in situ points (ArcMap)		1
272	10-11 August 2009	2	2009-08-11	2000	2009	08	Abbot Point Port limits			1				1:10,000	3	3 selected meadows	boat - diver (free)	1									human observation, in situ point assessments	GPS				1	1	1							CR, CS, HD, HO, HS, HU, SI, ZC		1	categorised meadow-scape	mdw boundaries ±10m to ±500m	modified visual estimates of biomass	human digitised on-screen interpolation from in situ points (ArcMap)		1
273	09 December 2009	1	2009-12-09	2000	2009	12	Abbot Point Port limits			1				1:10,000	3	4 selected meadows	boat - diver (free)	1									human observation, in situ point assessments	GPS				1	1	1							CR, CS, HD, HO, HS, HU, SI, ZC		1	categorised meadow-scape	mdw boundaries ±20m to ±50m	modified visual estimates of biomass	human digitised on-screen interpolation from in situ points (ArcMap)		1
274	08-09 June 2010	2	2010-06-09	2010	2010	06	Abbot Point Port limits			1				1:10,000	3	5 selected meadows	boat - diver (free)	1									human observation, in situ point assessments	GPS				1	1	1							CR, CS, HD, HO, HS, HU, SI, ZC		1	categorised meadow-scape	mdw boundaries ±20m to ±60m	modified visual estimates of biomass	human digitised on-screen interpolation from in situ points (ArcMap)		1
275	29 Nov + 11 Dec 2010	13	2010-11-11	2010	2010	11	Abbot Point Port limits			1				1:10,000	3	5 selected meadows	boat - diver (free)	1									human observation, in situ point assessments	GPS				1	1	1							CS, HD, HO, HS, HU, ZC		1	categorised meadow-scape	mdw boundaries ±30m to ±100m	modified visual estimates of biomass	human digitised on-screen interpolation from in situ points (ArcMap)		1
276	18-20 March 2011	3	2011-03-20	2010	2011	03	Abbot Point Port limits			1				1:10,000	3	2 selected meadows	boat - diver (free)	1									human observation, in situ point assessments	GPS				1	1	1							CS, HD, HO, HS, HU, ZC		1	categorised meadow-scape	mdw boundaries ±30m	modified visual estimates of biomass	human digitised on-screen interpolation from in situ points (ArcMap)		1
277	28-29 May 2011	2	2011-05-29	2010	2011	05	Abbot Point Port limits			1				1:10,000	3	1 selected meadows	boat - diver (free)	1									human observation, in situ point assessments	GPS				1	1	1							CS, HD, HO, HS, HU, ZC		1	categorised meadow-scape	mdw boundaries ±30m	modified visual estimates of biomass	human digitised on-screen interpolation from in situ points (ArcMap)		1
278	07-09 September 2011	3	2011-09-30^	2010	2011	09	Abbot Point Port limits			1				1:10,000	3	1 selected meadows	boat - diver (free)	1									human observation, in situ point assessments	GPS				1	1	1							CS, HD, HO, HS, HU, ZC		1	categorised meadow-scape	mdw boundaries ±30m	modified visual estimates of biomass	human digitised on-screen interpolation from in situ points (ArcMap)		1
279	08-09 Feb 2012	2	2012-02-09	2010	2012	02	Abbot Point Port limits			1				1:10,000	3	2 selected meadows	boat - diver (free)	1									human observation, in situ point assessments	GPS				1	1	1							CR, CS, HD, HO, HS, HU, ZC		1	categorised meadow-scape	mdw boundaries ±30m	modified visual estimates of biomass	human digitised on-screen interpolation from in situ points (ArcMap)		1
280	03-04 June 2012	2	2012-06-04	2010	2012	06	Abbot Point Port limits			1				1:10,000	3	1 selected meadows	boat - diver (free)	1									human observation, in situ point assessments	GPS				1	1	1							CR, CS, HD, HO, HS, HU, ZC		1	categorised meadow-scape	mdw boundaries ±30m	modified visual estimates of biomass	human digitised on-screen interpolation from in situ points (ArcMap)		1
281	15-21 April 2013	7	2013-04-21	2010	2013	04	Abbot Point Port limits			1				1:10,000	4	All meadows	boat - diver (free)	1									human observation, in situ point assessments	GPS				1	1	1							CR, CS, HD, HO, HS, HU, ZC	1	1	categorised meadow-scape	mdw boundaries ±20m to ±500m	modified visual estimates of biomass	human digitised on-screen interpolation from in situ points (ArcMap)		1
282	02-06 August 2013	5	2013-08-06	2010	2013	08	Abbot Point Port limits			1				1:10,000	3	2 selected meadows	boat - diver (free)	1									human observation, in situ point assessments	GPS				1	1	1							CR, CS, HD, HO, HS, HU, ZC		1	categorised meadow-scape	mdw boundaries ±20m to ±500m	modified visual estimates of biomass	human digitised on-screen interpolation from in situ points (ArcMap)		1
283	25-28 September 2013	4	2013-09-28	2010	2013	09	Abbot Point Port limits			1				1:10,000	4	All meadows	boat - diver (free)	1									human observation, in situ point assessments	GPS				1	1	1							CR, CS, HD, HO, HS, HT, HU, ZC	1	1	categorised meadow-scape	mdw boundaries ±50m to ±500m	modified visual estimates of biomass	human digitised on-screen interpolation from in situ points (ArcMap)		1
284	09-11 December 2013	3	2013-12-11	2010	2013	12	Abbot Point Port limits			1				1:10,000	3	3 selected meadows	boat - diver (free)	1									human observation, in situ point assessments	GPS				1	1	1							CR, CS, HD, HO, HS, HU, ZC		1	categorised meadow-scape	mdw boundaries ±10m	modified visual estimates of biomass	human digitised on-screen interpolation from in situ points (ArcMap)		1
285	15-17 March 2014	3	2014-03-17	2010	2014	03	Abbot Point Port limits			1				1:10,000	3	2 selected meadows	boat - diver (free)	1									human observation, in situ point assessments	GPS				1	1	1							CS, HD, HO, HS, HU, ZC		1	categorised meadow-scape	mdw boundaries ±50m	modified visual estimates of biomass	human digitised on-screen interpolation from in situ points (ArcMap)		1
286	24-25 July 2014	2	2014-07-25	2010	2014	07	Abbot Point Port limits			1				1:10,000	3	3 selected meadows	boat - diver (free)	1									human observation, in situ point assessments	GPS				1	1	1							CS, HD, HO, HS, HU, ZC		1	categorised meadow-scape	mdw boundaries ±10m to ±100m	modified visual estimates of biomass	human digitised on-screen interpolation from in situ points (ArcMap)		1
287	25-27 September 2014	3	2014-09-27	2010	2014	09	Abbot Point Port limits			1				1:10,000	3	4 selected meadows	boat - diver (free)	1									human observation, in situ point assessments	GPS				1	1	1							CS, HD, HO, HS, HU, ZC		1	categorised meadow-scape	mdw boundaries ±10m to ±100m	modified visual estimates of biomass	human digitised on-screen interpolation from in situ points (ArcMap)		1
288	09-11 December 2014	3	2014-12-11	2010	2014	12	Abbot Point Port limits			1				1:10,000	3	3 selected meadows	boat - diver (free)	1									human observation, in situ point assessments	GPS				1	1	1							CS, HD, HO, HS, HU, ZC		1	categorised meadow-scape	mdw boundaries ±10m to ±100m	modified visual estimates of biomass	human digitised on-screen interpolation from in situ points (ArcMap)		1
289	May 2015		2015-05-31^	2010	2015	05	Abbot Point Port limits			1				1:10,000	3	4 selected meadows	boat - diver (free)	1									human observation, in situ point assessments	GPS				1	1	1							CS, HD, HO, HS, HU, ZC		1	categorised meadow-scape	mdw boundaries ±20m to ±50m	modified visual estimates of biomass	human digitised on-screen interpolation from in situ points (ArcMap)		1
290	August 2015		2015-08-31^	2010	2015	08	Abbot Point Port limits			1				1:10,000	3	5 selected meadows	boat - diver (free)	1									human observation, in situ point assessments	GPS				1	1	1							CS, HD, HO, HS, HU, ZC		1	categorised meadow-scape	mdw boundaries ±20m to ±50m	modified visual estimates of biomass	human digitised on-screen interpolation from in situ points (ArcMap)		1
291	November 2015		2015-11-30^	2010	2015	11	Abbot Point Port limits			1				1:10,000	3	5 selected meadows	boat - diver (free)	1									human observation, in situ point assessments	GPS				1	1	1							CS, HD, HO, HS, HU, ZC		1	categorised meadow-scape	mdw boundaries ±20m to ±50m	modified visual estimates of biomass	human digitised on-screen interpolation from in situ points (ArcMap)		1
292	November 2016		2016-11-30^	2010	2016	11	Abbot Point Port limits			1				1:10,000	4	All meadows	boat - diver (free)	1									human observation, in situ point assessments	GPS				1	1	1							HD, HO, HS, HT, HU, ZC	1	1	categorised meadow-scape	mdw boundaries ±20m to ±50om	modified visual estimates of biomass	human digitised on-screen interpolation from in situ points (ArcMap)		1
293	December 2017		2017-12-31^	2010	2017	12	Abbot Point Port limits			1				1:10,000	3	3 selected meadows	boat - diver (free)	1							7	Google Earth	human observation, in situ point assessments	GPS				1	1	1							HD, HO, HS, HU, ZC		1	categorised meadow-scape	mdw boundaries ±20m to ±50om	modified visual estimates of biomass	human digitised on-screen interpolation from in situ points (ArcGIS)		1
294	2018-12-01		2018-12-31^	2010	2018	12	Abbot Point Port limits			1				1:10,000	3	4 selected meadows	boat - diver (free)	1							7	Google Earth	human observation, in situ point assessments	GPS				1	1	1							HD, HO, HS, HU, ZC		1	categorised meadow-scape	mdw boundaries ±20m to ±50om	modified visual estimates of biomass	human digitised on-screen interpolation from in situ points (ArcGIS)		1
295	2019-12-01		2019-12-31^	2010	2019	12	Abbot Point Port limits			1				1:10,000	3	3 selected meadows	boat - diver (free), camera, grab	1	1	1					7	Google Earth	human observation, in situ point assessments	GPS				1	1	1							HD, HO, HS, HU, ZC		1	categorised meadow-scape	mdw boundaries ±50m to ±500m	modified visual estimates of biomass	human digitised on-screen interpolation from in situ points (ArcGIS)		1
296	22-23 December 1993	2	1993-12-23	1990	1993	12	Mourilyan Harbour		1					1:10,000	3	All meadows - Baseline	boat - diver (free), grab	1	1				1		7		human observation, in situ point assessments	dGPS	1	1											EA, HD, HO, HU, ZC	1	1	categorised meadow-scape	meadow boundaries ±10 to ±30 m	visual estimates of biomass	human digitised on-screen interpolation from in situ points + interpretation AP (MapInfo)		1
297	26-27 July 1994	2	1994-07-27	1990	1994	07	Mourilyan Harbour		1					1:10,000	3	All meadows - Baseline	boat - diver (free), grab	1	1								human observation, in situ point assessments	dGPS	1	1											EA, HD, HO, HU, ZC	1	1	categorised meadow-scape	meadow boundaries ±10 to ±30 m	visual estimates of biomass	human digitised on-screen interpolation from in situ points (MapInfo)		1
298	4-5 January 1995	2	1995-01-05	1990	1995	01	Mourilyan Harbour		1					1:10,000	3	5 selected meadows	boat - diver (free), grab	1	1								human observation, in situ point assessments	dGPS	1	1											HD, HO, HU, ZC		1	categorised meadow-scape	meadow boundaries ±10 to ±30 m	visual estimates of biomass	human digitised on-screen interpolation from in situ points (MapInfo)		1
299	17-18 July 1995	2	1995-07-18	1990	1995	07	Mourilyan Harbour		1					1:10,000	3	5 selected meadows	boat - diver (free), grab	1	1								human observation, in situ point assessments	dGPS	1	1											HD, HO, HU, ZC		1	categorised meadow-scape	meadow boundaries ±10 to ±30 m	visual estimates of biomass	human digitised on-screen interpolation from in situ points (MapInfo)		1
300	12-13 December 1995	2	1995-12-13	1990	1995	12	Mourilyan Harbour		1					1:10,000	3	5 selected meadows	boat - diver (free), grab	1	1								human observation, in situ point assessments	dGPS	1	1											HD, HO, HU, ZC		1	categorised meadow-scape	meadow boundaries ±10 to ±30 m	visual estimates of biomass	human digitised on-screen interpolation from in situ points (MapInfo)		1
301	18-19 July 1996	2	1996-07-13	1990	1996	07	Mourilyan Harbour		1					1:10,000	3	5 selected meadows	boat - diver (free), grab	1	1								human observation, in situ point assessments	dGPS	1	1											EA, HD, HO, HU, ZC		1	categorised meadow-scape	meadow boundaries ±10 to ±30 m	visual estimates of biomass	human digitised on-screen interpolation from in situ points (MapInfo)		1
302	10-11 December 1996	2	1996-12-11	1990	1996	12	Mourilyan Harbour		1					1:10,000	3	All meadows	boat - diver (free), grab	1	1								human observation, in situ point assessments	dGPS	1	1											EA, HD, HO, HU, ZC	1	1	categorised meadow-scape	meadow boundaries ±10 to ±30 m	visual estimates of biomass	human digitised on-screen interpolation from in situ points (MapInfo)		1
303	24-25 July 1997	2	1996-07-25	1990	1996	07	Mourilyan Harbour		1					1:10,000	3	All meadows	boat - diver (free), grab	1	1								human observation, in situ point assessments	dGPS	1	1											EA, HD, HO, HU, ZC	1	1	categorised meadow-scape	meadow boundaries ±10 to ±30 m	visual estimates of biomass	human digitised on-screen interpolation from in situ points (MapInfo)		1
304	30 July - 02 August 2000	4	2000-08-02	2000	2000	08	Mourilyan Harbour		1					1:10,000	3	All meadows	helicopter; boat - camera, grab	1	1	1			1		8		human observation, in situ point assessments	dGPS; <1m	1	1											EA, HD, HO, HU, ZC	1	1	categorised meadow-scape	mdw boundaries 0.1m to 20m	modified visual estimates of biomass	human digitised on-screen interpolation from in situ points (MapInfo)		1
305	11-12 Dec 2000 and 17 Jan 2001	38	2001-01-17	2000	2001	01	Mourilyan Harbour		1					1:10,000	3	All meadows	helicopter; boat - camera, grab	1	1	1			1		8		human observation, in situ point assessments	dGPS; <1m	1	1											EA, HD, HO, HU, ZC	1	1	categorised meadow-scape	mdw boundaries 0.1m to 20m	modified visual estimates of biomass	human digitised on-screen interpolation from in situ points (MapInfo)		1
306	12 Nov and 03 Dec 2001	23	2001-12-03	2000	2001	12	Mourilyan Harbour		1					1:10,000	3	5 selected meadows	helicopter; boat - camera, grab	1	1	1			1		7		human observation, in situ point assessments	dGPS; <1m	1	1											EA, HD, HO, HU, ZC		1	categorised meadow-scape	mdw boundaries 0.1m to 30m	modified visual estimates of biomass	human digitised on-screen interpolation from in situ points (MapInfo)		1
307	3 Nov 2002 & 16 Jan 2003	76	2003-01-16	2000	2003	01	Mourilyan Harbour		1					1:10,000	3	5 selected meadows	helicopter; boat - camera, grab	1	1	1			1		8		human observation, in situ point assessments	GPS; <5m	1	1											EA, HD, HO, HU, ZC		1	categorised meadow-scape	mdw boundaries <5m to 30m	modified visual estimates of biomass	human digitised on-screen interpolation from in situ points (MapInfo)		1
308	December 2003		2003-12-31^	2000	2003	12	Mourilyan Harbour		1					1:10,000	3	5 selected meadows	helicopter; boat - camera, grab	1	1	1			1		8		human observation, in situ point assessments	GPS; <5m	1	1											EA, HD, HO, HU, ZC		1	categorised meadow-scape	mdw boundaries <5m to 30m	modified visual estimates of biomass	human digitised on-screen interpolation from in situ points (MapInfo)		1
309	10-30 November 2004	21	2004-11-30	2000	2004	11	Mourilyan Harbour		1					1:10,000	3	5 selected meadows	helicopter; boat - camera, grab	1	1	1			1		8		human observation, in situ point assessments	GPS; <5m	1	1											HD, HO, HU, ZC		1	categorised meadow-scape	mdw boundaries ±5 to ±30 m	modified visual estimates of biomass	human digitised on-screen interpolation from in situ points (MapInfo)		1
310	12-18 November 2005	7	2005-11-18	2000	2005	11	Mourilyan Harbour		1					1:10,000	3	5 selected meadows	helicopter; boat - camera, grab	1	1	1			1		8		human observation, in situ point assessments	GPS; ±5m	1	1											HD, HO, HU, ZC		1	categorised meadow-scape	mdw boundaries ±5 to ±30 m	modified visual estimates of biomass	human digitised on-screen interpolation from in situ points (ArcGIS)		1
311	24 May 2006		2006-05-24	2000	2006	05	Mourilyan Harbour		1					1:10,000	3	4 selected meadows	Aircraft - helicopter	1					1		8		human observation, in situ point assessments	GPS; ±5m	1												HO, ZC		1	categorised meadow-scape	mdw boundaries ±5 to ±10 m	modified visual estimates of biomass	human digitised on-screen interpolation from in situ points (ArcGIS)		1
312	03 Nov & 18 Dec 2006	46	2006-12-18	2000	2006	12	Mourilyan Harbour		1					1:10,000	3	5 selected meadows	helicopter; boat - camera, grab	1	1	1			1		8		human observation, in situ point assessments	GPS; ±5m	1	1											HD, HO, HU, ZC		1	categorised meadow-scape	mdw boundaries ±5 to ±30 m	modified visual estimates of biomass	human digitised on-screen interpolation from in situ points (ArcGIS)		1
313	10 Oct, 27 Nov, 12 Dec 2007, 07 Jan 2008	90	2008-01-07	2000	2008	01	Mourilyan Harbour		1					1:10,000	3	5 selected meadows	helicopter; boat - camera, grab	1	1	1			1		8		human observation, in situ point assessments	GPS; ±5m	1	1											HD, HO, HU, ZC		1	categorised meadow-scape	mdw boundaries ±5 to ±30 m	modified visual estimates of biomass	human digitised on-screen interpolation from in situ points (ArcGIS)		1
314	16 Oct, 05 Dec 2008	50	2008-12-05	2000	2008	12	Mourilyan Harbour		1					1:10,000	3	5 selected meadows	helicopter; boat - camera, grab	1	1	1			1		8		human observation, in situ point assessments	GPS; ±5m	1	1											HD, HO, HU, ZC		1	categorised meadow-scape	mdw boundaries ±5 to ±30 m	modified visual estimates of biomass	human digitised on-screen interpolation from in situ points (ArcGIS)		1
315	15 Oct, 25-26 Nov 2009	42	2009-11-26	2000	2009	11	Mourilyan Harbour		1					1:10,000	3	5 selected meadows	helicopter; boat - camera, grab	1	1	1			1		8		human observation, in situ point assessments	GPS; ±5m	1	1											HO, ZC		1	categorised meadow-scape	mdw boundaries ±5 to ±30 m	modified visual estimates of biomass	human digitised on-screen interpolation from in situ points (ArcGIS)		1
316	06 Oct - 18 Nov 2010	43	2010-11-18	2010	2010	11	Mourilyan Harbour		1					1:10,000	3	5 selected meadows	helicopter; boat - camera, grab	1	1	1			1		8		human observation, in situ point assessments	GPS; ±5m	1	1											HD, HO		1	categorised meadow-scape	mdw boundaries ±5 to ±30 m	modified visual estimates of biomass	human digitised on-screen interpolation from in situ points (ArcGIS)		1
317	26 Sep, 11 Nov 2011	46	2011-11-11	2010	2011	11	Mourilyan Harbour		1					1:10,000	3	5 selected meadows	helicopter; boat - camera, grab	1	1	1			1		8		human observation, in situ point assessments	GPS; ±5m	1	1											EA, HD, HO		1	categorised meadow-scape	mdw boundaries ±5 to ±30 m	modified visual estimates of biomass	human digitised on-screen interpolation from in situ points (ArcGIS)		1
318	15-25 October 2012	11	2012-10-25	2010	2012	10	Mourilyan Harbour		1					1:10,000	3	5 selected meadows	helicopter; boat - camera, grab	1	1	1				1	7		human observation, in situ point assessments	GPS	1	1											HD, HO		1	categorised meadow-scape	mdw boundaries ±5 to ±50 m	modified visual estimates of biomass	human digitised on-screen interpolation from in situ points (ArcGIS)		1
319	16 October, 25 November 2013	38	2013-11-25	2010	2013	11	Mourilyan Harbour		1					1:10,000	3	5 selected meadows	helicopter; boat - camera, grab	1	1	1				1	7		human observation, in situ point assessments	GPS	1	1											HD, HO		1	categorised meadow-scape	mdw boundaries ±1-5m to ±30 m	modified visual estimates of biomass	human digitised on-screen interpolation from in situ points (ArcGIS)		1
320	07 Oct, 03-04 Dec 2014	59	2014-12-04	2010	2014	12	Mourilyan Harbour		1					1:10,000	3	5 selected meadows	helicopter; boat - camera, grab	1	1	1				1	7		human observation, in situ point assessments	GPS	1	1											HD, HO		1	categorised meadow-scape	mdw boundaries ±1-5m to ±30 m	modified visual estimates of biomass	human digitised on-screen interpolation from in situ points (ArcGIS)		1
321	September and November 2015		2015-11-30^	2010	2015	11	Mourilyan Harbour		1					1:10,000	3	All meadows	helicopter; boat - camera, grab	1	1	1				1	7		human observation, in situ point assessments	GPS	1	1											EA, HD, HO, HU	1	1	categorised meadow-scape	mdw boundaries ±1-5m to ±30 m	modified visual estimates of biomass	human digitised on-screen interpolation from in situ points (ArcGIS)		1
322	October and November 2016		2016-11-30^	2010	2016	11	Mourilyan Harbour		1					1:10,000	3	5 selected meadows	helicopter; boat - camera, grab	1	1	1				1	7		human observation, in situ point assessments	GPS	1	1											EA, HD, HO, HU		1	categorised meadow-scape	mdw boundaries ±1-5m to ±30 m	modified visual estimates of biomass	human digitised on-screen interpolation from in situ points (ArcGIS)		1
323	October and November 2017		2017-11-30^	2010	2017	11	Mourilyan Harbour		1					1:10,000	3	5 selected meadows?	helicopter; boat - camera, grab	1	1	1				1	7		human observation, in situ point assessments	GPS	1	1											EA, HO, HU	1	1	categorised meadow-scape	mdw boundaries ±1-5m to ±30 m	modified visual estimates of biomass	human digitised on-screen interpolation from in situ points (ArcGIS)		1
324	8 Oct, 4-7 Dec 2018	60	2018-12-07	2010	2018	12	Mourilyan Harbour		1					1:10,000	3	5 selected meadows	helicopter; boat - camera, grab	1	1	1					7	Google Earth	human observation, in situ point assessments	GPS	1	1											EA, HD, HO, HU		1	categorised meadow-scape	mdw boundaries ±1-5m to ±30 m	modified visual estimates of biomass	human digitised on-screen interpolation from in situ points (ArcGIS)		1
325	27 Oct, 4-5 Dec 2019	39	2019-12-05	2010	2019	12	Mourilyan Harbour		1					1:10,000	3	5 selected meadows	helicopter; boat - camera, grab	1	1	1					7	Google Earth	human observation, in situ point assessments	GPS	1	1											EA, HD, HO		1	categorised meadow-scape	mdw boundaries ±1 to ±30 m	modified visual estimates of biomass	human digitised on-screen interpolation from in situ points (ArcGIS)		1
326	15 October-13 November 2020	30	2020-11-13	2020	2020	11	Mourilyan Harbour		1					1:10,000	3	5 selected meadows	helicopter; boat - camera, grab	1	1	1			1			ND	human observation, in situ point assessments	GPS	1	1											EA, HD, HO, HU		1	categorised meadow-scape	mdw boundaries ±1 to ±30 m	modified visual estimates of biomass	human digitised on-screen interpolation from in situ points (ArcGIS)		1
327	1941		1941	1940	1941		Townsville Port			1				1:36,945	4	Ross R to Sandfly Ck	aerial photo - Nadir						1		8		NA	NA				1	1		1	1					NA	1	1	NA	ND	"dense" vs "seagrass and sediment"	plotted on navigation charts, visual interpretation from AP, based on October 1987 field survey
328	01-07 June 1959	7	1959-06-07	1950	1959	06	Townsville Port			1				1:11,520	4	Cleveland Bay, Magnetic Is	aerial photo - Nadir						1		8		NA	NA				1	1		1	1					NA	1	1	NA	ND	"dense" vs "seagrass and sediment"	plotted on navigation charts, visual interpretation from AP, based on October 1987 field survey
329	30May - 14Jun 1974	16	1974-06-14	1970	1974	06	Townsville Port			1				1:12,000	4	Cleveland Bay, Magnetic Is	aerial photo - Nadir						1		8		NA	NA				1	1		1	1					NA	1	1	NA	ND	"dense" vs "seagrass and sediment"	plotted on navigation charts, visual interpretation from AP, based on October 1987 field survey
330	28 November 1978	1	1978-11-28	1970	1978	11	Townsville Port			1				1:12,000	4	Eastern Cleveland Bay, Magnetic Is.	aerial photo - Nadir						1		8		NA	NA				1	1		1	1					NA	1	1	NA	ND	"dense" vs "seagrass and sediment"	plotted on navigation charts, visual interpretation from AP, based on October 1987 field survey
331	14-15 July 1981	2	1981-07-15	1980	1981	07	Townsville Port			1				1:12,000	4	Cleveland Bay, Magnetic Is	aerial photo - Nadir						1		8		NA	NA				1	1		1	1					NA	1	1	NA	ND	"dense" vs "seagrass and sediment"	plotted on navigation charts, visual interpretation from AP, based on October 1987 field survey
332	15-28 June 1985	14	1985-06-28	1980	1985	06	Townsville Port			1				1:12,000	4	Cleveland Bay, Magnetic Is	aerial photo - Nadir						1		7		NA	NA				1	1		1	1					NA	1	1	NA	ND	"dense" vs "seagrass and sediment"	plotted on navigation charts, visual interpretation from AP, based on October 1987 field survey
333	September 1991		1991-09-30^	1990	1991	09	Townsville Port			1				1:12,000	4	Cleveland Bay, Magnetic Is	aerial photo - Nadir						1		7	September 1991, alt 4610	NA	NA				1	1		1	1					NA	1	1	categorised meadow-scape, density	ND	presence/absence	human digitised on-screen interpretation from AP, based on January 1993 field survey
334	early January 1993		1993-01-15^	1990	1993	01	Townsville Port			1				1:10,000	4	Cleveland Bay, Magnetic Is	by foot; boat - diver (free)	1					1		3	10 Dec 1992, alt 10 000', colour and infra-red	human observation, in situ point assessments	GPS; ±30-50m				1	1		1	1					CS, HO, HS, HU	1	1	categorised meadow-scape, density	ND	percent cover	plotted on navigation charts, human on-screen interpolation from in situ points, aided by visual interpretations of AP		1
335	28 Nov-02Dec 2007, 24-25 Feb 2008	89	2008-02-25	2000	2008	02	Townsville Port			1				1:10,000	4	All meadows	helicopter; boat - diver (free), camera, grab	1	1	1			1		7		human observation, in situ point assessments	GPS				1	1	1	1	1					CS, HD, HO, HS, HU, ZC	1	1	categorised meadow-scape	mdw boundaries ±10 to ±500 m	modified visual estimates of biomass	human digitised on-screen interpolation from in situ points (ArcGIS)		1
336	02-09 June 2008	7	2008-06-09	2000	2008	06	Townsville Port			1				1:10,000	4	All meadows	helicopter; boat - diver (free), camera, grab	1	1	1			1		7		human observation, in situ point assessments	GPS				1	1	1	1	1					CS, HD, HO, HS, HU, SI, TH, ZC	1	1	categorised meadow-scape	mdw boundaries ±10 to ±500 m	modified visual estimates of biomass	human digitised on-screen interpolation from in situ points (ArcGIS)		1
337	24-26 Oct, 03 Dec 2008	41	2008-12-03	2000	2008	12	Townsville Port			1				1:10,000	4	11 selected meadows	helicopter; boat - diver (free), camera, grab	1	1	1				1	7		human observation, in situ point assessments	GPS; ±5m				1	1		1	1					CS, HD, HO, HS, HU, TH, ZC		1	categorised meadow-scape	mdw boundaries ±10 to ±500 m	modified visual estimates of biomass	helicopter track & human digitised on-screen interpolation from in situ points (ArcGIS)	1	1
338	14-17 Oct, 27-29 Nov 2009	47	2009-11-29	2000	2009	11	Townsville Port			1				1:10,000	4	11 selected meadows	helicopter; boat - camera, grab	1	1	1				1	7		human observation, in situ point assessments	GPS; ±5m				1	1		1	1					CS, HD, HO, HS, HU, SI, TH, ZC		1	categorised meadow-scape	mdw boundaries ±10 to ±100 m	modified visual estimates of biomass	helicopter track & human digitised on-screen interpolation from in situ points (ArcGIS)	1	1
339	05-08 October 2010	3	2010-10-08	2010	2010	10	Townsville Port			1				1:10,000	4	11 selected meadows	helicopter; boat - camera, grab	1	1	1				1	7		human observation, in situ point assessments	GPS; ±5m				1	1		1	1					CS, HD, HO, HS, HU, TH, ZC		1	categorised meadow-scape	mdw boundaries ±10 to ±100 m	modified visual estimates of biomass	helicopter track & human digitised on-screen interpolation from in situ points (ArcGIS)	1	1
340	26-27 Oct, 13 Dec 2011	48	2011-12-13	2010	2011	12	Townsville Port			1				1:10,000	4	11 selected meadows	helicopter; boat - diver (free), camera, grab	1	1	1				1	7		human observation, in situ point assessments	GPS; ±5m				1	1		1	1					CS, HD, HO, HU, TH, ZC		1	categorised meadow-scape	mdw boundaries ±10 to ±100 m	modified visual estimates of biomass	helicopter track & human digitised on-screen interpolation from in situ points (ArcGIS)	1	1
341	26-30 September 2012	5	2012-09-30	2010	2012	09	Townsville Port			1				1:10,000	4	10 selected meadows	helicopter; boat - diver (free)	1						1	7		human observation, in situ point assessments	GPS; ±5m				1	1		1	1					CS, HD, HO, HS, HU, SI, TH, ZC		1	categorised meadow-scape	mdw boundaries ±10 to ±100 m	modified visual estimates of biomass	helicopter track & human digitised on-screen interpolation from in situ points (ArcGIS)	1	1
342	1-2, 14-18 and 24-26 Oct and 14 Dec 2013	75	2013-12-13	2010	2013	12	Townsville Port			1				1:10,000	4	10 selected meadows	helicopter; boat - diver (free), camera, grab	1	1	1							human observation, in situ point assessments	GPS				1	1		1	1					CS, HD, HO, HS, HU, TH, ZC		1	categorised meadow-scape	mdw boundaries ±10 to ±500 m	modified visual estimates of biomass	helicopter track & human digitised on-screen interpolation from in situ points (ArcGIS)	1	1
343	04‐10 October 2014	6	2014-10-10	2010	2014	10	Townsville Port			1				1:10,000	4	10 selected meadows	helicopter; boat - diver (free), camera, grab	1	1	1			1		7		human observation, in situ point assessments	GPS				1	1		1	1					CS, HD, HO, HS, HU, TH, ZC		1	categorised meadow-scape	mdw boundaries ±10 to ±150 m	modified visual estimates of biomass	helicopter track & human digitised on-screen interpolation from in situ points (ArcGIS)	1	1
344	24-28 September 2014	5	2014-09-28	2010	2014	09	Magnetic Island			1				1:12,000	3	All meadows	Boat - diver (free)	1						1	8	Google Earth 03 Oct09	human observation, in situ photo transects & point assessments	GPS							1	1					CS, HO, HU, ZC	1	1	spp, density	ND	percent cover (coral point count)	human digitised on-screen interpolation from in situ points + aided by AP (MapInfo)		1
345	26-30 September 2015	5	2015-09-30	2010	2015	09	Townsville Port			1				1:10,000	4	10 selected meadows	helicopter; boat - diver (free)	1									human observation, in situ point assessments	GPS				1	1		1	1					CS, HD, HO, HS, HU, SI, ZC		1	categorised meadow-scape	mdw boundaries ±10 to ±150 m	modified visual estimates of biomass	helicopter track & human digitised on-screen interpolation from in situ points (ArcGIS)	1	1
346	14-19 Sep and 17-23 Oct 2016	41	2016-10-23	2010	2016	10	Townsville Port			1				1:10,000	4	All meadows	helicopter; boat - diver (free), camera, grab	1	1	1							human observation, in situ point assessments	GPS				1	1	1	1	1					CS, HD, HO, HS, HU, SI, ZC	1	1	categorised meadow-scape	mdw boundaries ±10 to ±150 m	modified visual estimates of biomass	helicopter track & human digitised on-screen interpolation from in situ points (ArcGIS)	1	1
347	15-21 September 2017	7	2017-09-21	2010	2017	09	Townsville Port			1				1:10,000	4	10 selected meadows	helicopter; boat - diver (free)	1									human observation, in situ point assessments	GPS				1	1		1	1					CS, HD, HO, HS, HU, ZC		1	categorised meadow-scape	mdw boundaries ±10 to ±150 m	modified visual estimates of biomass	helicopter track & human digitised on-screen interpolation from in situ points (ArcGIS)	1	1
348	6‐7 and 14‐16 October 2018	11	2018-10-16	2010	2018	10	Townsville Port			1				1:10,000	4	10 selected meadows	helicopter; boat - camera, grab	1	1								human observation, in situ point assessments	GPS				1	1		1	1					CS, HD, HO, HS, HU, ZC		1	categorised meadow-scape	mdw boundaries ±10 to ±150 m	modified visual estimates of biomass	helicopter track & human digitised on-screen interpolation from in situ points (ArcGIS)	1	1
349	11 May 1993	1	1993-05-11	1990	1993	05	Townsville Port			1				1:10,000	4	Cleveland Bay, Magnetic Is	by foot; boat - diver (free)	1					1		1	5 May 1993, alt 10 000', colour and infra-red	human observation, in situ point assessments	GPS; ±30-50m				1	1		1	1					CS, HO, HS, HU	1	1	categorised meadow-scape, spp, density	ND	percent cover	plotted on navigation charts, human digitising on-screen interpolation from in situ points, aided by visual interpretations of AP		1
350	April and May 2019		2019-05-31^	2010	2019	05	Townsville Port			1				1:10,000	4	All meadows	helicopter; boat - camera, grab, sled	1	1	1							human observation, in situ point assessments	GPS				1	1	1	1	1					CR, CS, EA, HD, HO, HS, HU, TH, ZC	1	1	categorised meadow-scape	mdw boundaries ±3 to ±200 m	modified visual estimates of biomass	helicopter track & human digitised on-screen interpolation from in situ points (ArcGIS)	1	1
351	September and October 2019		2019-10-31^	2010	2019	10	Townsville Port			1				1:10,000	4	All meadows	helicopter; boat - camera, grab, sled	1	1	1							human observation, in situ point assessments	GPS				1	1	1	1	1					CR, CS, EA, HD, HO, HS, HU, TH, ZC	1	1	categorised meadow-scape	mdw boundaries ±3 to ±200 m	modified visual estimates of biomass	helicopter track & human digitised on-screen interpolation from in situ points (ArcGIS)	1	1
352	April		2020-04-30^	2020	2020	4	Townsville Port			1				1:10,000	4	10 selected meadows	helicopter; boat - diver (free), camera, grab	1	1	1				1	7	Google Earth	human observation, in situ point assessments	ND				1	1		1	1					CS, HD, HO, HS, HU, ZC		1	categorised meadow-scape	mdw boundaries 3-20m to 100m+	modified visual estimates of biomass	helicopter track & human digitised on-screen interpolation from in situ points (ArcGIS)	1	1
353	September – October		2020-11-31^	2020	2020	10	Townsville Port			1				1:10,000	4	13 selected meadows	helicopter; boat - diver (free), camera, grab, sled	1	1	1				1	7	Google Earth	human observation, in situ point assessments	ND				1	1	1	1	1					CR, CS, EA, HD, HO, HS, HU, TH, ZC	1	1	categorised meadow-scape	mdw boundaries 3-20m to 100m+	modified visual estimates of biomass	helicopter track & human digitised on-screen interpolation from in situ points (ArcGIS)	1	1
354	16 Sep - 18 Oct 2005	34	2005-10-18	2000	2005	10	Archer Pt - Gladstone	1	1	1	1	1		1:100	2	5.5ha sentinel sites	by foot	1									human observation, in situ point assessments	GPS with 1 second polling; ±3m	1	1		1	1		1	1					CS,CR, EA, HO, HD, HS, HU, SI, TH, ZC	1	1	not specified	mdw boundaries ±<3m	presence/absence	GPS track (ArcGIS)	1
355	26 Mar - 26 May 2006	62	2006-05-26	2000	2006	05	Archer Pt - Gladstone	1	1	1	1	1		1:100	2	5.5ha sentinel sites	by foot	1									human observation, in situ point assessments	GPS with 1 second polling; ±3m	1	1		1	1		1	1					CS,CR, EA, HO, HD, HS, HU, SI, TH, ZC	1	1	not specified	mdw boundaries ±<3m	presence/absence	GPS track (ArcGIS)	1
356	05 Sep - 03 Nov 2006	60	2006-11-03	2000	2006	11	Archer Pt - Gladstone	1	1	1	1	1		1:100	2	5.5ha sentinel sites	by foot	1									human observation, in situ point assessments	GPS with 1 second polling; ±3m	1	1		1	1		1	1					CS,CR, EA, HO, HD, HS, HU, SI, TH, ZC	1	1	not specified	mdw boundaries ±<3m	presence/absence	GPS track (ArcGIS)	1
357	14 Apr - 17 May 2007	35	2007-05-17	2000	2007	05	Archer Pt - Gladstone	1	1	1	1	1		1:100	2	5.5ha sentinel sites	by foot	1									human observation, in situ point assessments	GPS with 1 second polling; ±3m	1	1		1	1		1	1					CS,CR, EA, HO, HD, HS, HU, SI, TH, ZC	1	1	not specified	mdw boundaries ±<3m	presence/absence	GPS track (ArcGIS)	1
358	24 Sep - 23 Nov 2007	62	2007-11-23	2000	2007	11	Archer Pt - Rodds Bay	1	1	1	1	1	1	1:100	2	5.5ha sentinel sites	by foot	1									human observation, in situ point assessments	GPS with 1 second polling; ±3m	1	1		1	1		1	1					CS,CR, EA, HO, HD, HS, HU, SI, TH, ZC	1	1	not specified	mdw boundaries ±<3m	presence/absence	GPS track (ArcGIS)	1
359	03 Apr - 25 May 2008	53	2008-05-25	2000	2008	05	Archer Pt - Rodds Bay	1	1	1	1	1	1	1:100	2	5.5ha sentinel sites	by foot	1									human observation, in situ point assessments	GPS with 1 second polling; ±3m	1	1		1	1		1	1					CS,CR, EA, HO, HD, HS, HU, SI, TH, ZC	1	1	not specified	mdw boundaries ±<3m	presence/absence	GPS track (ArcGIS)	1
360	23 Sep - 26 Nov 2008	67	2008-11-26	2000	2008	11	Archer Pt - Rodds Bay	1	1	1	1	1	1	1:100	2	5.5ha sentinel sites	by foot	1									human observation, in situ point assessments	GPS with 1 second polling; ±3m	1	1		1	1		1	1					CS,CR, EA, HO, HD, HS, HU, SI, TH, ZC	1	1	not specified	mdw boundaries ±<3m	presence/absence	GPS track (ArcGIS)	1
361	10 Mar - 22 May 2009	74	2009-05-22	2000	2009	05	Archer Pt - Rodds Bay	1	1	1	1	1	1	1:100	2	5.5ha sentinel sites	by foot	1									human observation, in situ point assessments	GPS with 1 second polling; ±3m	1	1		1	1		1	1					CS,CR, EA, HO, HD, HS, HU, SI, TH, ZC	1	1	not specified	mdw boundaries ±<3m	presence/absence	GPS track (ArcGIS)	1
362	15 Sep - 30 Nov 2009	78	2009-11-30	2000	2009	11	Archer Pt - Rodds Bay	1	1	1	1	1	1	1:100	2	5.5ha sentinel sites	by foot	1									human observation, in situ point assessments	GPS with 1 second polling; ±3m	1	1		1	1		1	1					CS,CR, EA, HO, HD, HS, HU, SI, TH, ZC	1	1	not specified	mdw boundaries ±<3m	presence/absence	GPS track (ArcGIS)	1
363	27 Mar - 28 Apr 2010	33	2010-04-28	2010	2010	04	Archer Pt - Rodds Bay	1	1	1	1	1	1	1:100	2	5.5ha sentinel sites	by foot	1									human observation, in situ point assessments	GPS with 1 second polling; ±3m	1	1		1	1		1	1					CS,CR, EA, HO, HD, HS, HU, SI, TH, ZC	1	1	not specified	mdw boundaries ±<3m	presence/absence	GPS track (ArcGIS)	1
364	21 Sep - 04 Dec 2010	96	2010-12-04	2010	2010	12	Archer Pt - Rodds Bay	1	1	1	1	1	1	1:100	2	5.5ha sentinel sites	by foot	1									human observation, in situ point assessments	GPS with 1 second polling; ±3m	1	1		1	1		1	1					CS,CR, EA, HO, HD, HS, HU, SI, TH, ZC	1	1	not specified	mdw boundaries ±<3m	presence/absence	GPS track (ArcGIS)	1
365	17 Mar - 24 May 2011	69	2011-05-24	2010	2011	05	Archer Pt - Rodds Bay	1	1	1	1	1	1	1:100	2	5.5ha sentinel sites	by foot	1									human observation, in situ point assessments	GPS with 1 second polling; ±3m	1	1		1	1		1	1					CS,CR, EA, HO, HD, HS, HU, SI, TH, ZC	1	1	not specified	mdw boundaries ±<3m	presence/absence	GPS track (ArcGIS)	1
366	24 Sep - 26 Nov 2011	65	2011-11-26	2010	2011	11	Archer Pt - Rodds Bay	1	1	1	1	1	1	1:100	2	5.5ha sentinel sites	by foot; SCUBA	1									human observation, in situ point assessments	GPS with 1 second polling; ±3m	1	1		1	1		1	1					CS,CR, EA, HO, HD, HS, HU, SI, TH, ZC	1	1	not specified	mdw boundaries ±<3m	presence/absence	GPS track, human on-screen interpolation from in situ points (ArcGIS)	1	1
367	06 Mar - 04 Jun 2012	91	2012-06-04	2010	2012	06	Shelburne Bay - Rodds Bay	1	1	1	1	1	1	1:100	2	5.5ha sentinel sites	by foot; SCUBA	1									human observation, in situ point assessments	GPS with 1 second polling; ±3m	1	1		1	1		1	1					CS,CR, EA, HO, HD, HS, HU, SI, TH, ZC	1	1	not specified	mdw boundaries ±<3m	presence/absence	GPS track, human on-screen interpolation from in situ points (ArcGIS)	1	1
368	29 Aug - 13 Nov 2012	77	2012-11-13	2010	2012	11	Shelburne Bay - Rodds Bay	1	1	1	1	1	1	1:100	2	5.5ha sentinel sites	by foot; SCUBA	1									human observation, in situ point assessments	GPS with 1 second polling; ±3m	1	1		1	1		1	1					CS,CR, EA, HO, HD, HS, HU, SI, TH, ZC	1	1	not specified	mdw boundaries ±<3m	presence/absence	GPS track, human on-screen interpolation from in situ points (ArcGIS)	1	1
369	03 Apr - 24 May 2013	52	2013-05-24	2010	2013	05	Shelburne Bay - Rodds Bay	1	1	1	1	1	1	1:100	2	5.5ha sentinel sites	by foot; SCUBA	1									human observation, in situ point assessments	GPS with 1 second polling; ±3m	1	1		1	1		1	1					CS,CR, EA, HO, HD, HS, HU, SI, TH, ZC	1	1	not specified	mdw boundaries ±<3m	presence/absence	GPS track, human on-screen interpolation from in situ points (ArcGIS)	1	1
370	03 Sep - 03 Nov 2013	61	2013-11-03	2010	2013	11	Shelburne Bay - Rodds Bay	1	1	1	1	1	1	1:100	2	5.5ha sentinel sites	by foot; SCUBA	1									human observation, in situ point assessments	GPS with 1 second polling; ±3m	1	1		1	1		1	1					CS,CR, EA, HO, HD, HS, HU, SI, TH, ZC	1	1	not specified	mdw boundaries ±<3m	presence/absence	GPS track, human on-screen interpolation from in situ points (ArcGIS)	1	1
371	27 Feb - 14 Jun 2014	111	2014-06-14	2010	2014	06	Shelburne Bay - Rodds Bay	1	1	1	1	1	1	1:100	2	5.5ha sentinel sites	by foot; SCUBA	1									human observation, in situ point assessments	GPS with 1 second polling; ±3m	1	1		1	1		1	1					CS,CR, EA, HO, HD, HS, HU, SI, TH, ZC	1	1	not specified	mdw boundaries ±<3m	presence/absence	GPS track, human on-screen interpolation from in situ points (ArcGIS)	1	1
372	07 Sep - 06 Nov 2014	61	2014-11-06	2010	2014	11	Shelburne Bay - Rodds Bay	1	1	1	1	1	1	1:100	2	5.5ha sentinel sites	by foot; SCUBA	1									human observation, in situ point assessments	GPS with 1 second polling; ±3m	1	1		1	1		1	1					CS,CR, EA, HO, HD, HS, HU, SI, TH, ZC	1	1	not specified	mdw boundaries ±<3m	presence/absence	GPS track, human on-screen interpolation from in situ points (ArcGIS)	1	1
373	18 Mar - 11 Jun 2015	86	2015-06-11	2010	2015	06	Low Isles - Sarina Inlet		1	1	1			1:100	2	5.5ha sentinel sites	by foot; SCUBA	1									human observation, in situ point assessments	GPS with 1 second polling; ±3m	1	1		1	1		1	1					CS,CR, EA, HO, HD, HS, HU, SI, TH, ZC	1	1	not specified	mdw boundaries ±<3m	presence/absence	GPS track, human on-screen interpolation from in situ points (ArcGIS)	1	1
374	01 Sep - 26 Nov 2015	88	2015-11-26	2010	2015	11	Shelburne Bay - Rodds Bay	1	1	1	1	1	1	1:100	2	5.5ha sentinel sites	by foot; SCUBA	1									human observation, in situ point assessments	GPS with 1 second polling; ±3m	1	1		1	1		1	1					CS,CR, EA, HO, HD, HS, HU, SI, TH, ZC	1	1	not specified	mdw boundaries ±<3m	presence/absence	GPS track, human on-screen interpolation from in situ points (ArcGIS)	1	1
375	10 Mar - 03 Jun 2016	86	2016-06-03	2010	2016	06	Stanley Is - Sarina Inlet	1	1	1	1			1:100	2	5.5ha sentinel sites	by foot; SCUBA	1									human observation, in situ point assessments	GPS with 1 second polling; ±3m	1	1		1	1		1	1					CS,CR, EA, HO, HD, HS, HU, SI, TH, ZC	1	1	not specified	mdw boundaries ±<3m	presence/absence	GPS track, human on-screen interpolation from in situ points (ArcGIS)	1	1
376	05 Sep - 15 Nov 2016	72	2016-11-15	2010	2016	11	Piper Reef - Rodds Bay	1	1	1	1	1	1	1:100	2	5.5ha sentinel sites	by foot; SCUBA	1									human observation, in situ point assessments	GPS with 1 second polling; ±3m	1	1		1	1		1	1					CS,CR, EA, HO, HD, HS, HU, SI, TH, ZC	1	1	not specified	mdw boundaries ±<3m	presence/absence	GPS track, human on-screen interpolation from in situ points (ArcGIS)	1	1
377	10 Apr - 27 May 2017	49	2017-05-27	2010	2017	05	Low Isles - Rodds Bay		1	1	1	1	1	1:100	2	5.5ha sentinel sites	by foot; SCUBA	1									human observation, in situ point assessments	GPS with 1 second polling; ±3m	1	1		1	1		1	1					CS,CR, EA, HO, HD, HS, HU, SI, TH, ZC	1	1	not specified	mdw boundaries ±<3m	presence/absence	GPS track, human on-screen interpolation from in situ points (ArcGIS)	1	1
378	04 Sep - 06 Dec 2017	88	2017-12-06	2010	2017	12	Shelburne Bay - Rodds Bay	1	1	1	1	1	1	1:100	2	5.5ha sentinel sites	by foot; boat - camera, grab	1	1	1							human observation, in situ point assessments	GPS with 1 second polling; ±3m	1	1		1	1		1	1					CS,CR, EA, HO, HD, HS, HU, SI, TH, ZC	1	1	not specified	mdw boundaries ±<3m	presence/absence	GPS track, human on-screen interpolation from in situ points (ArcGIS)	1	1
379	26 Feb - 16 May 2018	83	2018-05-16	2010	2018	05	Low Isles - Rodds Bay		1	1	1	1	1	1:100	2	5.5ha sentinel sites	by foot; boat - camera, grab	1	1	1							human observation, in situ point assessments	GPS with 1 second polling; ±3m	1	1		1	1		1	1					CS,CR, EA, HO, HD, HS, HU, SI, TH, ZC	1	1	not specified	mdw boundaries ±<3m	presence/absence	GPS track, human on-screen interpolation from in situ points (ArcGIS)	1	1
380	05 Sep - 24 Nov 2018	81	2018-11-24	2010	2018	11	Shelburne Bay - Rodds Bay	1	1	1	1	1	1	1:100	2	5.5ha sentinel sites	by foot; boat - camera, grab	1	1	1				1	1	PlanetScope	human observation, in situ point assessments	GPS with 1 second polling; ±3m	1	1		1	1		1	1					CS,CR, EA, HO, HD, HS, HU, SI, TH, ZC	1	1	not specified	mdw boundaries ±<3m	presence/absence	GPS track, human on-screen & Geostatistical Analyst interpolation from in situ points, supervised classification SI (ArcGIS)	1
381	13 Mar - 31 May 2019	80	2019-05-31	2010	2019	05	Low Isles - Rodds Bay		1	1	1	1	1	1:100	2	5.5ha sentinel sites	by foot; boat - camera, grab	1	1	1				1	1	PlanetScope	human observation, in situ point assessments	GPS with 1 second polling; ±3m	1	1		1	1		1	1					CS,CR, EA, HO, HD, HS, HU, SI, TH, ZC	1	1	not specified	mdw boundaries ±<3m	presence/absence	GPS track, human on-screen & Geostatistical Analyst interpolation from in situ points, supervised classification SI (ArcGIS)	1
382	25 Sep - 27 Nov 2019	65	2019-11-27	2010	2019	11	Shelburne Bay - Rodds Bay	1	1	1	1	1	1	1:100	2	5.5ha sentinel sites	by foot; boat - camera, grab	1	1	1				1	1	PlanetScope	human observation, in situ point assessments	GPS with 1 second polling; ±3m	1	1		1	1		1	1					CS,CR, EA, HO, HD, HS, HU, SI, TH, ZC	1	1	not specified	mdw boundaries ±<3m	presence/absence	GPS track, human on-screen & Geostatistical Analyst interpolation from in situ points, supervised classification SI (ArcGIS)	1
383	10 Mar - 06 Jun 2020	89	2020-06-06	2020	2020	06	Low Isles - Rodds Bay		1	1	1	1	1	1:100	2	5.5ha sentinel sites	by foot; boat - camera, grab	1	1	1				1	1	PlanetScope	human observation, in situ point assessments	GPS with 1 second polling; ±3m	1	1		1	1		1	1					CS,CR, EA, HO, HD, HS, HU, SI, TH, ZC	1	1	not specified	mdw boundaries ±<3m	presence/absence	GPS track, human on-screen & Geostatistical Analyst interpolation from in situ points, supervised classification SI (ArcGIS)	1
384	1984 - 2001		2001-12-31^	2000	2001		Great Barrier Reef coast-dry	1	1	1	1	1	1	1:350,000	6	All meadows to 15m depth	historic boat - diver (free)										human observation, in situ point assessments	GPS	1	1		1	1								ND	1	1	presence	predicted likelihood of seagrass presence	presence/absence	modelled, 2km x 2km planning unit, conditional probability, Bayesian belief network
385	1984 - 2001		2001-12-31^	2000	2001		Great Barrier Reef coast-wet	1	1	1	1	1	1	1:350,000	6	All meadows to 15m depth	historic boat - diver (free)										human observation, in situ point assessments	GPS	1	1		1	1								ND	1	1	presence	predicted likelihood of seagrass presence	presence/absence	modelled, 2km x 2km planning unit, conditional probability, Bayesian belief network
386	1900 - 2016		2016-12-31^	2010	2016		GBRWHA	1	1	1	1	1	1	1:100,000	6	All meadows	probability of distribution from 0.50 to 0.73										Point-based occurrences (fossil specimens, human observations, preserved specimens)	GPS; estimate	1	1	1	1	1	1	1	1	1	1	1	1	CS,CR, EA, HC, HD, HO, HS, HU, SI, TC, TH, ZC	1	1	presence	visual check, ±1km	presence	maximum entropy modelling, approx 1km x 1km grid
387	06 September 2017	1	2017-09-06	2010	2017	09	Bushland Beach & Cape Pallarenda			1				1:10,000	3	All meadows	Aircraft - helicopter	1									human observation, in situ photoquadrats	GPS; ±5m				1									HO, HU,HS	1	1	spp, density	mdw boundaries ±5m	percent cover	helicopter track & human digitised on-screen interpolation from in situ points (ArcGIS)	1	1
388	17 September 2017	1	2017-09-17	2010	2017	09	Bathurst Bay	1						1:10,000	4	All meadows	Aircraft - helicopter	1									human observation, in situ photoquadrats	GPS; ±5m				1	1								CR, HO, HU, TH, ZC		1	spp, density	mdw boundaries ±5m	percent cover	helicopter track & human digitised on-screen interpolation from in situ points (ArcGIS)	1	1
389	18 September 2017	1	2017-09-18	2010	2017	09	Shelburne Bay	1						1:10,000	3	All meadows	Aircraft - helicopter	1									human observation, in situ photoquadrats	GPS; ±5m				1	1								HO, HU, TH		1	spp, density	mdw boundaries ±5m	percent cover	helicopter track & human digitised on-screen interpolation from in situ points (ArcGIS)	1	1
390	05 October 2017	1	2017-10-05	2010	2017	10	Shoalwater Bay					1		1:10,000	4	All meadows	Aircraft - helicopter; satellite	1						1	3	PlanetScope 13 August 2017	human observation, in situ photoquadrats	GPS; ±5m				1	1								HO, HU, ZC		1	spp, density	mdw boundaries ±5m	percent cover	helicopter track, machine-learning from SI with calibration+validation from in situ points	1
391	25-27 Nov 2020	3	2020-11-27	2020	2020	11	Green Island		1					1:100	3	All meadows	by foot photo-transects; UAV; ; satellite	1				1		1	1	UAV 25Nov20; PlanetScope 05Nov20	human observation, in situ photoquadrats	GPS; ±1.5m							1	1					CR, CS, HO, HU, SI, TH	1	1	spp, density	mdw boundaries ±1.5m	percent cover	deep-learning from UAV image; machine-learning from SI with calibration+validation from in situ photoquadrats
392	17 October 2017	1	2017-10-17	2010	2017	10	Midge Point				1			1:10,000	3	All meadows	Aircraft - helicopter; ; satellite	1						1	2	PlanetScope 09 October 2017	human observation, in situ photoquadrats	GPS; ±5m				1	1								HO, HU, ZC		1	spp, density	mdw boundaries ±5 to ±10 m	percent cover	helicopter track, machine-learning from SI with calibration+validation from in situ points	1
393	05 September 2017	1	2017-10-17	2010	2017	10	Yule Point		1					1:100	3	All meadows	Aircraft - helicopter; ; satellite	1						1	1	PlanetScope 05Sep17	human observation, in situ photoquadrats	GPS; ±5m				1	1								HO, HU		1	spp, density	mdw boundaries ±5 to ±10 m	percent cover	helicopter track, machine-learning from SI with calibration+validation from in situ points	1
394	13-14 August 2019	2	2019-08-14	2019	2019	08	Yule Point		1					1:100	2	All meadows	by foot photo-transects; satellite	1						1	1	PlanetScope 09Aug19	human observation, in situ photoquadrats	GPS; ±1.5m				1									HO, HU		1	spp, density	mdw boundaries ±1.5m	percent cover	helicopter track, machine-learning from SI with calibration+validation from in situ points	1
395	20 July 2020	1	2020-07-20	2020	2020	07	Yule Point		1					1:100	2	All meadows	UAV					1			1		human observation, in situ photoquadrats	GPS; ±1.5m				1									HO, HU		1	spp, density	mdw boundaries ±1.5m	percent cover	deep-learning from UAV image	1
[truncated: 12 more columns]

## Sheet: References
	Citation	Reference
	Amies et al. (2013)	Amies, R.A., McCormack, C.V., Rasheed, M.A., 2013. Gladstone Permanent Transect Seagrass Monitoring – May 2013 Update Report. TropWATER Publication 13/11. James Cook University, Cairns.
	Arthur et al. (2006)	Arthur, K.E., Limpus, C.J., Roelfsema, C.M., Udy, J.W., Shaw, G.R., 2006. A bloom of Lyngbya majuscula in Shoalwater Bay, Queensland, Australia: An important feeding ground for the green turtle (Chelonia mydas). Harmful Algae 5, 251-265.
	Ayling (2008)	Ayling, T., 2008. Report for Port of Airlie,Seagrass Monitoring, Dredging Survey-June 2008. GHD, Mackay.
	Ayling et al. (1997)	Ayling, A.M., Roelofs, A.J., McKenzie, L.J. and Lee Long, W.J. (1997) Port of Cape Flattery benthic monitoring, baseline survey – Wet-season (February) 1996. EcoPorts Monograph Series No 5. (Ports Corporation of Queensland, Brisbane) 67 pp.
	Bryant & Rasheed (2018)	Bryant, C.V., Rasheed, M.A., 2018. Port of Townsville Annual Seagrass Monitoring Survey: September 2017. TropWATER, JCU, Cairns.
	Bryant et al. (2014)	Bryant, C.V., Davies, J.D., Jarvis, J.C., Tol, S., Rasheed, M.A., 2014. Seagrasses in Port Curtis and Rodds Bay 2013: Annual Long Term Monitoring, Biannual Western Basin Surveys & Updated Baseline Survey, TropWATER Publication 14/23. James Cook University, Cairns.
	Bryant et al. (2019)	Bryant, C.V., Wells, J.N., Rasheed, M.A., 2019. Port of Townsville Annual Seagrass Monitoring Survey: October 2018. TropWATER, JCU, Cairns.
	Campbell et al. (2002a)	Campbell,S.J., Roder,C.A., McKenzie,L.J and Lee Long, W.J. (2002). Seagrass Resources in the Whitsunday Region 1999 and 2000. DPI Information Series QI02043 (DPI, Cairns) 50 pp.
	Campbell et al. (2002b)	Campbell, S. J., Rasheed, M.A. and Thomas, R. (2002). Seagrass habitat of Cairns Harbour and Trinity Inlet: December 2001. DPI Information Series QI02059 (DPI, Cairns), 25 pp.
	Campbell et al. (2003)	Campbell, S.J., Rasheed, M.A. and Thomas, R. (2003). Monitoring of seagrass meadows in Cairns Harbour and Trinity Inlet: December 2002. DPI Information Series QI03059 (DPI, Cairns), 20 pp.
	Carter et al. (2015)	Carter, A., Davies, J., Bryant, C., Jarvis, J., McKenna, S., Rasheed, M., 2015. Seagrasses in Port Curtis and Rodds Bay 2014: Annual long-term monitoring, biannual Western Basin, and updated baseline survey. Centre for Tropical Water & Aquatic Ecosystem Research, James Cook University, Cairns.
	Carter et al. (2016)	Carter, A.B., Bryant, C.V., Davies, J.D., Rasheed, M.A., 2016. Gladstone Healthy Harbour Partnership 2016 Report Card, ISP011: Seagrass’. TropWATER Publication 16/23. James Cook University, Cairns.
	Carter & Rasheed (2013)	Carter AB & Rasheed MA (2013) Critical marine habitats in high risk areas, Bathurst Bay region - 2012 Atlas. JCU Publication, Centre for Tropical Water & Aquatic Ecosystem Research, Report No. 13/19, Cairns.
	Carter & Rasheed (2014)	Carter AB & Rasheed MA (2014) Critical marine habitats in high risk areas, South Warden Reef to Howick Group - 2013 Atlas. JCU Publication, Centre for Tropical Water & Aquatic Ecosystem Research, Report no. 13/56, Cairns.
	Carter & Rasheed (2015)	Carter AB & Rasheed MA (2015) Critical marine habitats in high risk areas, Crescent Reef to Cape Flattery - 2014 Atlas. JCU Publication, Centre for Tropical Water & Aquatic Ecosystem Research, Report no. 15/13, Cairns.
	Carter & Rasheed (2018)	Carter, A.B., Rasheed, M.A., 2018. Mackay-Whitsunday 2017 Baseline Seagrass Survey: Marine Inshore South Zone. TropWATER Publication 18/08. James Cook University, Cairns.
	Carter & Rasheed (2019)	Carter, A.B., Rasheed, M.A., 2019. Mackay-Whitsunday Seagrass Monitoring 2018: Marine Inshore South Zone. TropWATER Publication 19/05. James Cook University, Cairns.
	Carter et al. (2012)	Carter AB, Chartrand KM and Rasheed MA (2012) Critical marine habitats in high risk areas, Princess Charlotte Bay region - 2011 Atlas. DAFF Publication, Northern Fisheries Centre, Cairns.
	Carter et al. (2021)	Carter, A.B., McKenna, S.A., Rasheed, M.A., Collier, C., McKenzie, L., Pitcher, R., Coles, R., 2021. Synthesizing 35 years of seagrass spatial data from the Great Barrier Reef World Heritage Area, Queensland, Australia. Limnology and Oceanography Letters n/a.
	Chartrand et al. (2008)	Chartrand, K., Rasheed, M., Sankey, T., 2008. Deep water seagrass dynamics in Hay Point - Measuring variability and monitoring impacts of capital dredging. Final Report to the Ports Corporation of Queensland. DPI&F Publication PR08-4082. DPI&F, Cairns.
	Chartrand et al. (2009)	Chartrand, K.M., Rasheed, M.A., Unsworth, R.K.F., 2009. Long term seagrass monitoring in Port Curtis and Rodds Bay, November 2008. DEEDI Publication PR09-4407 QPIF, Cairns.
	Chartrand et al. (2011)	Chartrand, K., McCormack, C., Rasheed, M., 2011. Port Curtis and Rodds Bay seagrass monitoring program, November 2010. DEEDI, Cairns.
	Chartrand et al. (2018)	Chartrand, K., Rasheed, M., Carter, A., 2018. Seagrasses in Port Curtis and Rodds Bay 2017: Annual long-term monitoring. TropWATER Publication 18/14. James Cook University, Cairns.
	Chartrand et al. (2019)	Chartrand, K., Wells, J., Carter, A., Rasheed, M., 2019. Seagrasses in Port Curtis and Rodds Bay 2018: Annual long-term monitoring. TropWATER Publication 19/02. James Cook University, Cairns.
	Coles et al. (1985)	Coles, R.G., Lee Long, W.J., and Squire, L.C. (1985). Seagrass beds and prawn nursery grounds between Cape York and Cairns Queensland Department of Primary Industries Information Series #Q185017 (QDPI, Brisbane, Australia) 31pp.
	Coles et al. (1987)	Coles, R.G., Mellors, J.E., Bibby, J.M., and Squire, B. (1987). Seagrass beds and juvenile prawn nursery grounds between Bowen and Water Park Point. Queensland Department of Primary Industries Information Series #Q187021 (QDPI, Brisbane, Australia) 54pp.
	Coles et al. (1990)	Coles, R.G., Goeden, G.B., Lee Long, W.J., Greenway, M., 1990. An assessment of the likely effects of the proposed Trinity Point project in the marine ecology of the Cairns Harbour and Foreshore. QDPI and Hollongwood Consultants, Cairns.
	Coles et al. (1992)	Coles, R.G., Lee Long, W.J., Helmke, S.A., Bennett, R.E., Miller, D.J., and Derbyshire, K.J. (1992). Seagrass beds and juvenile prawn nursery grounds Cairns to Bowen. Queensland Department of Primary Industries Information Series QI92012 (QDPI: NFC, Cairn
	Coles et al. (1993)	Coles, R.G., Lee Long, W.J., Watson, R.A., and Derbyshire, K.J. (1993). Distribution of seagrasses, and their fish and penaeid prawn communities, in Cairns Harbour, a tropical estuary, northern Queensland, Australia. Australian Journal of Marine and Fresh
	Coles et al. (1994)	Coles, R., McKenzie, L.J., Tyson, L.M., Lee Long, W.J., 1994. Distribution of Seagrasses at Oyster Point, Cardwell - a reconnaissance survey September 1994. Report for Office of the Co-ordinator General. QDPI, Cairns.
	Coles et al. (1996)	Coles, R.G., Lee Long, W.J., McKenzie, L.J., Short, M., Rasheed, M.A., and Vidler, K.P. (1996). `Distribution of deep-water seagrass habitats between Cape Weymouth and Cape Tribulation, northeastern Queensland'. Queensland Department of Primary Industrie
	Coles et al. (1997)	Coles, R.G., Lee Long, W.J., and McKenzie, L.J. (1997). `Distribution and Abundance of Seagrasses at Oyster Point, Cardwell - Spring (November) 1995 & Winter (August) 1996. Queensland Department of Primary Industries Information Series QI97055 (QDPI, NFC,
	Coles et al. (1998)	Coles, R., Lee Long, W., McKenzie, L., Roder, C., Roelofs, A., Daniel, P., 1998. Seagrasses in deepwater on the Queensland continental shelf - Poster, Society for Conservation Biology, Macquarie University, 13 - 16 July, Sydney, Australia.
	Coles et al. (2000)	Coles, R.G., Lee Long, W.J., McKenzie, L.J., Roelofs, A.J. and De’ath G. (2000) Stratification of seagrasses in the Great Barrier Reef World Heritage Area, Northeastern Australia, and the implications for management. Biol. Mar. Medit. 7(2): 345-348.
	Coles et al. (2001a)	Coles, R.G., McKenzie, L.J. & Yoshida, R.L. (2001a) Validation and GIS of seagrass surveys between Cape York and Tarrant Point– October/November 1986. CD Rom. (DPI, QFS, Cairns).
	Coles et al. (2001b)	Coles, R.G., McKenzie, L.J. & Yoshida, R.L. (2001b) Validation and GIS of seagrass surveys between Cape York and Cairns - November 1984. CD Rom.
	Coles et al. (2001c)	Coles, R.G., McKenzie, L.J., Mellors, J.E. & Yoshida, R.L. (2001c) Validation and GIS of seagrass surveys between Cairns and Bowen – October/November 1987. CD Rom. (DPI, QFS, Cairns).
	Coles et al. (2001d)	Coles, R.G., McKenzie, L.J. & Yoshida, R.L. (2001d) Validation and GIS of seagrass surveys between Bowen and Water Park Point– March/April 1987. CD Rom. (DPI, QFS, Cairns).
	Coles et al. (2001e)	Coles, R.G., McKenzie, L.J. & Yoshida, R.L. (2001e) Validation and GIS of seagrass surveys between Water Park Point and Hervey Bay – October/November 1988. CD Rom. (DPI, QFS, Cairns).
	Coles et al. (2002)	Coles, R.G., Lee Long, W.J., McKenzie, L.J., and Roder C.A..(Eds) (2002) Seagrass and Marine resources in the Dugong Protection Areas of Upstart Bay, Newry Region, Sand Bay, Ince Bay, Llewellyn Bay and Clairview Region, April/May 1999 and October 1999. Gr
	Coles et al. (2007)	Coles, R., McKenzie, L., Rasheed, M.A., Mellors, J., Taylor, H., Dew, K., McKenna, S., Sankey, T., Carter, A., Grech, A., 2007. Status and trends of seagrass habitats in the Great Barrier Reef World Heritage Area, Unpublished report to the Marine and Tropical Sciences Research Facility. Reef and Rainforest Research Centre Limited, Cairns, p. 122.
	Coles et al. (2009)	Coles, R., McKenzie, L.J., De'ath, G., Roelofs, A., Lee Long, W.J., 2009. Spatial distribution of deepwater seagrass in the inter-reef lagoon of the Great Barrier Reef World Heritage Area. Marine Ecology Progress Series 392, 57-68.
	Collier et al. (2011)	Collier, C., McKenzie, L., Waycott, M., 2011. Reef Rescue Extreme Weather Incident Response (EWIR) Program – Post-flood and Tropical Cyclone Yasi Assessment of Seagrass Status in Dugong and Green Turtle Feeding Grounds. Unpublished report to the Great Barrier Reef Marine Park Authority.
	Conacher (2015)	Conacher, C., 2015. Whisper Bay Benthic Survey - March 2015. FRC Environmental, Wellington Point, Qld, p. 3.
	Conacher et al. (2004a)	Conacher, C., Thorogood, J., Fowler, R., Preston, K., 2004. Pioneer Bay Environmental Monitoring Program, Eleventh Monitoring Event, November 2003. A report prepared for Whitsunday Shire Council. FRC Environmental, Wellington Point, Qld, p. 42.
	Conacher et al. (2004b)	Conacher, C., Thorogood, J., Fowler, R., Olds, A., 2004. Pioneer Bay Environmental Monitoring Program, Twelfth Monitoring Event, April 2004. A report prepared for Whitsunday Shire Council. FRC Environmental, Wellington Point, Qld, p. 33.
	Conacher et al. (2004c)	Conacher, C., Thorogood, J., Drummond, S., Olds, A., Thorburn, L., 2004. Port Douglas harbour dredge impact assessment study: aquatic ecology. A report prepared for Kellogg, Brown & Root Pty. Ltd. FRC Environmental, Wellington Point, Qld, p. 70.
	Cribb (1974)	Cribb, A., 1974. Vegetation of Low Isles Reef. Department of Botany, University of Queensland, Brisbane.
	Davies et al. (2013a)	Davies, J.D., McCormack, C.V., Rasheed, M.A., 2013. Port Curtis and Rodds Bay seagrass monitoring program, Biannual Western Basin & Annual Long Term Monitoring November 2012. TropWATER, JCU, Cairns.
	Davies et al. (2013b)	Davies, J.N., McKenna, S.A., Rasheed, M.A., 2013. Port of Townsville Long-Term Seagrass Monitoring: September 2012. TropWATER, James Cook University, Cairns.
	Davies et al. (2014)	Davies, J., McKenna, S., Jarvis, J., Carter, A., Rasheed, M., 2014. Port of Townsville annual monitoring and baseline survey, October 2013 – TropWATER Report no. 14/02. James Cook University Publication, Centre for Tropical Water & Aquatic Ecosystem Research (TropWATER), Cairns.
	Davies et al. (2015)	Davies, J., Tol, S., Rasheed, M., 2015. Port of Townsville Annual Monitoring Survey: October 2014. JCU Publication, Centre for Tropical Water & Aquatic Ecosystem Research, Cairns.
	Davies et al. (2016)	Davies, J.N., Rasheed, M.A., 2016. Port of Townsville Annual Seagrass Monitoring: September 2015. James Cook University Publication, Centre for Tropical Water & Aquatic Ecosystem Research (TropWATER), Cairns.
	Dekker & Phinn (2005)	Dekker, A., Phinn, S., (Eds), 2005. Port Curtis and Fitzroy River Estuary Remote Sensing Tasks. CRC for Coastal Zone, Estuary and Waterway Management PC2/FE2 Project Final Report - June 2005. CSIRO Land and Water, and University of Queensland, Canberra and Brisbane, p. 178.
	Dennison et al. (1995a)	Dennison, W.C., O'Donohue, M.J.H., Abal, E.G., 1995. Using Marine Plants as Nutrient Bioindicators in the Region of Pioneer Bay, Airlie Beach, Queensland: Wet Weather Sampling May 1995. Marine Botany Section, Department of Botany, University of Queensland, Brisbane, QLD, p. 39.
	Dennison et al. (1995b)	Dennison, W.C., O'Donohue, M.J.H., Abal, E.G., 1995. Using Marine Plants as Nutrient Bioindicators in the Region of Pioneer Bay, Airlie Beach, Queensland: Dry season sampling September 1995. Marine Botany Section, Department of Botany, University of Queensland, Brisbane, QLD, p. 41.
	Derbyshire et al. (1995)	Derbyshire, K.J., Willoughby, S.R., McColl, A.L., Hocroft, D.M., 1995. Small prawn habitat and recruitment study : final report to the Fisheries Research and Development Corporation and the Queensland Fisheries Management Authority. Department of Primary Industries, Cairns.
	Ellison (1997)	Ellison, J.C., 1997. Topographic survey of Low Isles. Report to the Low Isles Preservation Society. Australian Institute of Marine Science, Townsville, p. 12.
	Fairbridge & Teichert (1948)	Fairbridge, R.W., Teichert, C., 1948. The Low Isles of the Great Barrier Reef: A New Analysis. The Geographical Journal 111, 67-88.
	Fairweather et al. (2011a)	Fairweather, C.L., McKenna, S.A., Rasheed, M.A., 2011. Long-term seagrass monitoring in Cairns Harbour and Trinity Inlet – December 2009 and 2010. Fisheries Queensland, DEEDI Cairns.
	Fairweather et al. (2011b)	Fairweather, C.L., McKenna, S.A., Rasheed, M.A., 2011. Long-Term Seagrass Monitoring in the Port of Mourilyan – November 2010. Fisheries Queensland, DEEDI, Cairns.
	Flanagan Consulting Group (2017)	Flanagan Consulting Group, 2017. Marine Ecology, Chapter B7, in: Ports North (Ed.), Cairns Shipping Development Project, Revised Draft Environmental Impact Statement. Ports North,, Cairns, pp. 1-139.
	FRC Coastal Resource & Environmental (1995)	FRC Coastal Resource & Environmental, 1995. Airlie Beach Swimming Lagoon Preliminary Environmental Assessment Ecological Issues. Prepared for Gutteridge Haskins & Davey, Cairns. FRC Environmental, Wellington Point, Qld, p. 16.
	FRC Coastal Resource & Environmental (1997a)	FRC Coastal Resource & Environmental, 1997. Ince Bay Inshore Seagrass Survey. Prepared for The Queensland Commercial Fishermen’s Organisation. FRC Environmental, Wellington Point, Qld, p. 10. 1997. Ince Bay Inshore Seagrass Survey. Prepared for The Queensland Commercial Fishermen’s Organisation.
	FRC Coastal Resource & Environmental (1997b)	FRC Coastal Resource & Environmental, 1997. Distribution of Inshore Seagrasses in Upstart Bay, Cleveland Bay and South of Lucinda. Prepared for Queensland Commercial Fishermen’s Organisation. FRC Environmental, Wellington Point, Qld, p. 17.
	FRC Coastal Resource & Environmental (1998)	FRC Coastal Resource & Environmental, 1998. Pioneer Bay Environmental Monitoring Program: First Monitoring Event, June 1998. Prepared for Whitsunday Shire Council. FRC Environmental, Wellington Point, Qld.
	FRC Coastal Resource & Environmental (1999a)	FRC Coastal Resource & Environmental, 1999. Hamilton Prawn Farm: Seagrass Baseline Survey, July 1999 and Discussion of Impacts, a report to LGP Holdings. FRC Environmental, Wellington Point, Qld.
	FRC Coastal Resource & Environmental (1999b)	FRC Coastal Resource & Environmental, 1999. Hamilton Prawn Farm: Seagrass Monitoring, October 1999, a report to LGP Holdings P/L. FRC Environmental, Wellington Point, Qld.
	FRC Environmental (1998)	FRC Environmental, 1998. Proposed Shute harbour dredging Environmental Assessment – Aquatic flora and Fauna, Report prepared for GHD. FRC Environmental, Wellington Point, Qld.
	FRC Environmental (2000a)	FRC Environmental, 2000. Pioneer Bay Environmental Monitoring Program: Fifth monitoring event, June 2000. A report prepared for Whitsunday Shire Council. FRC Environmental, Wellington Point, Qld.
	FRC Environmental (2000b)	FRC Environmental, 2000. Pioneer Bay Environmental Monitoring Program: Sixth monitoring event, November 2000. A report prepared for Whitsunday Shire Council. FRC Environmental, Wellington Point, Qld.
	FRC Environmental (2001a)	FRC Environmental, 2001. Pioneer Bay Environmental Monitoring Program: Seventh monitoring event, June 2001. A report prepared for Whitsunday Shire Council. FRC Environmental, Wellington Point, Qld.
	FRC Environmental (2001b)	FRC Environmental, 2001. Pioneer Bay Environmental Monitoring Program: 8thMonitoring Event, November 2001. A report prepared for Whitsunday Shire Council. FRC Environmental, Wellington Point, Qld.
	FRC Environmental (2001c)	FRC Environmental, 2001. Review of factors influencing the distribution and survival of seagrasses, with particular reference to Pioneer Bay, Boat Haven Bay and Charles Bay, April 2001. A report prepared for Whitsunday Shire Council. FRC Environmental, Wellington Point, Qld.
	FRC Environmental (2001d)	FRC Environmental, 2001. Hamilton Prawn Farm: Biological and Sediment Survey Spring 2000, a report prepared for LGP Holdings. FRC Environmental, Wellington Point, Qld.
	FRC Environmental (2002a)	FRC Environmental, 2002. Hamilton Prawn Farm: Biological, Sediment and Water Quality Survey Spring 2001, a report prepared for LGP Holdings. FRC Environmental, Wellington Point, Qld.
	FRC Environmental (2002b)	FRC Environmental, 2002. Boathaven Bay Marina, Supplementary EIS: Marine Ecosystems, Report prepared for Sinclair Knight Merz. FRC Environmental, Wellington Point, Qld.
	FRC Environmental (2003a)	FRC Environmental, 2003. Hamilton Prawn Farm, Biological & Sediment Survey: Spring 2002. Prepared for LGP Holding Pty Ltd. FRC Environmental, Wellington Point, Qld, p. 46.
	FRC Environmental (2003b)	FRC Environmental, 2003. Hamilton Prawn Farm, Biological & Sediment Survey: Spring 2003. Prepared for LGP Holding Pty Ltd. FRC Environmental, Wellington Point, Qld, p. 48.
	FRC Environmental (2005a)	FRC Environmental, 2005. Pioneer Bay Environmental Monitoring Program, May 2005. A report prepared for Whitsunday Shire Council. FRC Environmental, Wellington Point, Qld, p. 40.
	FRC Environmental (2005b)	FRC Environmental, 2005. Port Douglas Offshore Disposal of Dredge Spoil - Biological Assessment. Prepared for Kellogg Brown & Root Pty Ltd. FRC Environmental, Wellington Point, Qld, p. 82.
	FRC Environmental (2005c)	FRC Environmental, 2005. Shute Harbour Marina EIS: Aquatic Ecology. Prepared for Connell Wagner. FRC Environmental, Wellington Point, Qld, p. 75.
	FRC Environmental (2006a)	FRC Environmental, 2006. Bowen Boat Harbour: Long-term Dredging Strategy - Aquatic Ecology. Prepared for Cardno Lawson Treloar. FRC Environmental, Wellington Point, Qld, p. 74.
	FRC Environmental (2006b)	FRC Environmental, 2006. Hamilton Prawn Farm, Biological & Sediment Survey: Spring 2005. Prepared for LGP Holding Pty Ltd. FRC Environmental, Wellington Point, Qld, p. 52.
	FRC Environmental (2006c)	FRC Environmental, 2006. Pioneer Bay Environmental Monitoring Program, May 2006. A report prepared for Whitsunday Shire Council. FRC Environmental, Wellington Point, Qld, p. 75.
	FRC Environmental (2006d)	FRC Environmental, 2006. Triangular Island contamination assessment - Aquatic ecology and related issues. FRC Environmental, Wellington Point, Qld.
	FRC Environmental (2007a)	FRC Environmental, 2007. Hamilton Prawn Farm, Biological & Sediment Survey: Autumn 2007. Prepared for LGP Holding Pty Ltd. FRC Environmental, Wellington Point, Qld, p. 64.
	FRC Environmental (2007b)	FRC Environmental, 2007. Morey Reef, Impact of Dredging Dickson’s Inlet on Coral Health and Condition. Prepared for Kellogg, Brown & Root Pty Ltd. FRC Environmental, Wellington Point, Qld, p. 20.
	FRC Environmental (2008)	FRC Environmental, 2008. Hamilton Prawn Farm, Biological & Sediment Survey: Autumn 2008. Prepared for LGP Holding Pty Ltd. FRC Environmental, Wellington Point, Qld, p. 56.
	FRC Environmental (2009a)	FRC Environmental, 2009. Pioneer Bay Environmental Monitoring Program, November 2008. A report prepared for Whitsunday Shire Council. FRC Environmental, Wellington Point, Qld, p. 40.
	FRC Environmental (2009b)	FRC Environmental, 2009. Port Hinchinbrook Seagrass Monitoring - December 2008. Prepared for EcoSustainAbility. FRC Environmental, Wellington Point, Qld, p. 30.
	FRC Environmental (2009c)	FRC Environmental, 2009. Bowen Sewage Outfall: Preliminary Assessment of the Impacts of Effluent Discharge - December 2008. Prepared for Whitsunday Regional Council. FRC Environmental, Wellington Point, Qld, p. 30.
	FRC Environmental (2012)	FRC Environmental, 2012. Great Keppel Island Resort Revitalisation EIS: Aquatic Ecology. Prepared for Tower Holdings Pty Ltd. FRC Environmental, Wellington Point, p. 128.
	FRC Environmental (2014)	FRC Environmental, 2014. Leekes Creek Estuary: Fish Survey and Seagrass Assessment. Prepared for Department of National Parks, Recreation, Sport and Racing. FRC Environmental, Wellington Point, p. 54.
	FRC Environmental (2015a)	FRC Environmental, 2015. Leekes Creek Estuary: Seasonal Fish Surveys and Seagrass Assessment. Prepared for Department of National Parks, Sport and Racing. FRC Environmental, Wellington Point, p. 41.
	FRC Environmental (2015b)	FRC Environmental, 2015. Port of Airlie: 2014 Seagrass Monitoring Program. Prepared for Ashgrove Environmental on behalf of Meridien Management. FRC Environmental, Wellington Point, Qld, p. 29.
	FRC Environmental (2016)	FRC Environmental, 2016. Port of Airlie 2015 Seagrass Monitoring Program. Prepared for Ashgrove Environmental on behalf of Meridien Management. FRC Environmental, Wellington Point, Qld, p. 40.
	FRC Environmental (2018)	FRC Environmental, 2018. Shute Harbour Marine Plants Survey - October 2018. Prepared for Whitsunday Regional Council. FRC Environmental, Wellington Point, Qld, p. 8.
	Fuentes et al. (2006)	Fuentes, M.M.P.B., Lawler, I.R., Gyuris, E., 2006. Dietary preferences of juvenile green turtles (Chelonia mydas) on a tropical reef flat. Wildlife Research 33, 671-678.
	GHD (2005)	GHD 2005, ‘Rosslyn Bay Boat Harbour –Longterm Dredge Strategy, Marine Biota Survey –October 2004’. Report for Queensland Transport pp 48.
	Goldsworthy (1994)	Goldsworthy, P.M., 1994. Seagrasses, in: Benson, L., Goldsworthy, P., Butler, R., Oliver, J. (Eds.), Townsville Port Authority Capital Dredging Works 1993: Environmental Monitoring Program. Townsville Port Authority, Townsville, pp. 89-115.
	Grant & Jones (2016)	Grant, B., Jones, C., 2016. Additional Field Studies for Townsville Port Expansion Project AEIS. BMT WBM Pty Ltd, Brisbane
	Grech & Coles (2010)	Grech, A., Coles, R.G., 2010. An ecosystem-scale predictive model of coastal seagrass distribution. Aquatic conservation: Marine and freshwater ecosystems 20, 437-444.
	Jarvis et al. (2014)	Jarvis, J.C., Rasheed, M.A., McKenna, S.A., Sankey, T., 2014. Seagrass habitat of Cairns Harbour and Trinity Inlet: Annual and Quarterly Monitoring Report. JCU Publication, Centre for Tropical Water & Aquatic Ecosystem Research Publication 14/09. James Cook University, Cairns.
	Jarvis et al. (2015)	Jarvis, J., Rasheed, M., Sankey, T., 2015. Seagrass habitat of Cairns Harbour and Trinity Inlet: Annual and Quarterly Monitoring Report. TropWATER Publication 15/10. Centre for Tropical Water & Aquatic Ecosystem Research, James Cook University, Cairns.
	Jayathilake & Costello (2018)	Jayathilake, D.R.M., Costello, M.J., 2018. A modelled global distribution of the seagrass biome. Biological Conservation 226, 120-126.
	Jones & Richardson (2017)	Jones, C., Richardson, D., 2017. Cairns Shipping Development EIS – Additional Studies – Marine Ecology Baseline Report. BMT WBM Pty Ltd, Brisbane.
	Karuma Australia (1998)	Karuma Australia 1998. Environmental Baseline Monitoring Study, Edgecumbe Bay Aquaculture Facility, a report prepared for LGP Holdings Pty Ltd.
	Kuchler (1978)	Kuchler, D.A., 1978. Coral cay shoreline movements: historical and seasonal patterns: Green Island, Great Barrier Reef, Australia. James Cook University, Townsville.
	Kuchler (1979)	Kuchler, D.A., 1979. Green Island: the man-environment interface, a geomorphological perspective, in: Great Barrier Reef Committee (Ed.), An account of the present knowledge and use of the Great Barrier Reef from Lizard Island to Bowen with recommendations for its conservation and management. Unpublished report to the Great Barrier Reef Marine Park Authority. University of Queensland, Brisbane, p…
	Kwak & Klumpp (2004)	Kwak, S.N., Klumpp, D.W., 2004. Temporal variation in species composition and abundance of fish and decapods of a tropical seagrass bed in Cockle Bay, North Queensland, Australia. Aquatic Botany 78, 119-134.
	Lanyon & Marsh (1995)	Lanyon, J.M., Marsh, H., 1995. Temporal changes in the abundance of some tropical intertidal seagrasses in North Queensland. Aquatic Botany 49, 217-237.
	Lee Long et al. (1989)	Lee Long, W.J., Coles, R.G., Helmke, S.A., Bennett, R.E., 1989. Seagrass habitats in coastal, mid shelf and reef waters from Lookout Point to Barrow Point in north-eastern Queensland, Report to the Great Barrier Reef Marine Park Authority. Queensland Department of Primary Industries, Cairns.
	Lee Long et al. (1991)	Lee Long, W.J. and Coles, R.G. (1991). Seagrass habitats in Halifax Bay, Magnetic Island and Townsville, northern Queensland, A report to the Great Barrier Reef Marine Park Authority. 27pp.
	Lee Long et al. (1992)	Lee Long, W.J., Coles, R.G., Miller, K.J., Vidler, K.P., and Derbyshire, K.J. (1992). Seagrass beds and juvenile prawn and fish nursery grounds: Water Park Point to Hervey Bay, Queensland. Queensland Department of Primary Industries Information Series #Q
	Lee Long et al. (1994)	Lee Long, W.J., McKenzie, L.J., Rasheed, M.A., Coles, R.G., 1994. Port of Mourilyan Seagrass monitoring, first survey - summer (December) 1993. Northern Fisheries Centre, QDPI, Cairns, p. 28.
	Lee Long et al. (1996a)	Lee Long, W.J., Rasheed, M.A., McKenzie, L.J., Coles, R.G., 1996. Distribution of Seagrasses in Cairns Harbour and Trinity Inlet - December 1993. QDPI, Brisbane.
	Lee Long et al. (1996b)	Lee Long, W.J., Coles, R.G., McKenzie, L.J., 1996. Deepwater seagrasses in northeastern Australia - how deep, how meaningful?, in: Kuo, J., Phillips, R.C., Walker, D.I., Kirkman, H. (Eds.), Seagrass Biology: Proceedings of an International Workshop, Rottnest Island, Western Australia 25-29 January, 1996. Faculty of Sceinces, The University of Western Australia, Perth, pp. 41-50.
	Lee Long et al. (1996c)	Lee Long, W.J., McKenzie, L.J., Coles, R.G., 1996. Distribution of seagrasses in Shoalwater Bay, Queensland - September 1995. QDPI: NFC, Cairns.
	Lee Long et al. (1997)	Lee Long, W.J., McKenzie, L.J., and Coles, R.G. (1997). `Seagrasses communities in the Shoalwater Bay region, Queensland - Spring (September) 1995 & Autumn (April) 1996'. Queensland Department of Primary Industries Information Series QI96042 (QDPI, Brisba
	Lee Long et al. (1998a)	Lee Long, W.J., Coles, R.G., McKenzie, L.J., Roelofs, A.J., Roder, C.A and. Daniel, P.A. (1998). Oyster Point Post-dredging Seagrass Distribution, December 1997. Final report to Department of Economic Development and Trade. (Queensland Department of Prima
	Lee Long et al. (1998b)	Lee Long, W.J., McKenzie, L.J., Roelofs, A.J., Makey, L., Coles, R.G. and Roder, C.A. (1998). Baseline Survey of Hinchinbrook Region Seagrasses, -October (Spring) 1996, Great Barrier Reef Marine Park Authority Research Publication No. 51, 26 pp.
	Lee Long et al. (1998c)	Lee Long, W.J., Hundley, A.J., Roder, C.A., McKenzie, L.J., 1998. Preliminary evaluation of an acoustic technique for mapping tropical seagrass habitats, Great Barrier Reef Marine Park Authority Research Publication No. 52. Great Barrier Reef Marine Park Authority, Townsville, p. 30.
	Lee Long et al. (1999)	Lee Long, W.J., Roelofs, A.J., Coles, R.G., McKenzie, L.J. and. Daniel, P.A. (1999). Oyster Point Seagrass Monitoring, 1995 to 1998. Report to the Department of State Development. (Queensland Department of Primary Industries) 34 pp.
	Lee Long et al. (2002)	Lee Long, W.J., Roelofs, A.J., Coles, R.G., McKenzie, L.J., 2002. Monitoring Oyster Point Seagrasses - 1995 to 1999. GBRMPA Research Publication no.71. Great Barrier Reef Marine Park Authority, Townsville. p. 24.
	Lobegeier (2002)	Lobegeier, M.K., 2002. Benthic foraminifera of the family Calcarinidae from Green Island Reef, Great Barrier Reef province. Journal of Foraminiferal Research 32, 201-216.
	Marine Bio Logic (1991)	Marine Bio Logic, 1991. Impact Assessment Study, Whitsunday Yacht Club Marina and Resort, Report prepared for Scotex Pty Ltd, Queensland.
	Marsh & Saalfeld (1989a)	Marsh, H., Saalfeld, W., 1989. Aerial Surveys of Sea Turtles in the Northern Great Barrier-Reef Marine Park. Wildlife Research 16, 239-249.
	Marsh & Saalfeld (1989b)	Marsh, H., Saalfeld, W.K., 1989. Distribution and abundance of dugongs in the northern Great Barrier Reef Marine Park. Australian Wildlife Research 16, 429-440.
	Marsh & Saalfeld (1990)	Marsh, H., Saalfeld, W.K., 1990. The distribution and abundance of dugongs in the Great Barrier Reef Marine Park, south of Cape Bedford. Australian Wildlife Research 17, 511-524.
	McKenna & Rasheed (2011)	McKenna, S.A., Rasheed, M.A., 2011. Port of Abbot Point Long-Term Seagrass Monitoring: Interim Report 2008-2011. Fisheries Queensland, DEEDI, Cairns.
	McKenna & Rasheed (2012)	McKenna, S., Rasheed, M., 2012. Port of Townsville Long-term Seagrass Monitoring, October 2011. DEEDI Publication. Fisheries Queensland, Cairns.
	McKenna & Rasheed (2013a)	McKenna, S.A., Rasheed, M.A., 2013. Long-term seagrass monitoring in the Port of Mourilyan – 2012. Centre for Tropical Water & Aquatic Ecosystem Research, JCU, Cairns.
	McKenna & Rasheed (2013b)	McKenna, S., Rasheed, M., 2013. Port of Abbot Point Long-Term Seagrass Monitoring: Annual Report 2011-2012. JCU Publication, Centre for Tropical Water & Aquatic Ecosystem Research, Cairns.
	McKenna & Rasheed (2014)	McKenna, S., Rasheed, M., 2014. Port of Abbot Point Long-Term Seagrass Monitoring: Annual Report 2012-2013. TropWATER 13/44 2014. JCU Publication, Centre for Tropical Water & Aquatic Ecosystem Research, Cairns.
	McKenna & Rasheed (2015)	McKenna, S., Rasheed, M., 2015. Port of Hay Point & Keswick Island Seagrass & Benthic Habitat: baseline survey – 2014. JCU Publication, Centre for Tropical Water & Aquatic Ecosystem Research Publication, Cairns.
	McKenna & Rasheed (2017a)	McKenna, S.A., Rasheed, M., 2017 Annual seagrass monitoring in the Mackay-Hay Point Region 2016. Centre for Tropical Water & Aquatic Ecosystem Research (TropWATER), James Cook University, Cains.
	McKenna & Rasheed (2017b)	McKenna, S.A., Rasheed, M.A., 2017. Hay Point Seagrass and Benthic Habitat Survey – 2016. TropWATER, JCU, Cairns.
	McKenna et al. (2005)	McKenna, S.A., Rasheed, M.A., Thomas, R., 2005. Long-term seagrass monitoring in the Port of Mourilyan - November 2004. DPI&F Information Series QI05037. Northern Fisheries Centre, DPI&F, Cairns.
	McKenna et al. (2007)	McKenna, S.A., Rasheed, M.A., Sankey, T.L., 2007. Long term seagrass monitoring in the Port of Mourilyan - November 2006. DPI&F Publication number PR07-2915. Northern Fisheries Centre, , DPI&F, Cairns.
	McKenna et al. (2008a)	McKenna, S.A., Rasheed, M.A., Sankey, T.L., Taylor, H.A., 2008. Long term seagrass monitoring in the Port of Mourilyan - November 2007. DPI&F Publication number PR07-3270. Northern Fisheries Centre, DPI&F, Cairns.
	McKenna et al. (2008b)	McKenna, S., Rasheed, M., Unsworth, R., Chartrand, K., 2008. Port of Abbot Point seagrass baseline surveys - wet & dry season 2008. DPI&F Publication PR08-4140. DPI&F, Cairns.
	McKenna et al. (2009)	McKenna, S.A., Rasheed, M.A., Unsworth, R.K.F., Taylor, H.A., Chartrand, K.M., Sankey, T.L., 2009. Long term seagrass monitoring in Cairns Harbour and Trinity Inlet – December 2008 PR09-4436. QPI&F, Cairns.
	McKenna et al. (2016a)	McKenna, S.A., Sozou, A.M., Scott, E.L., Rasheed, M.A., 2016. Annual Seagrass Monitoring in the Mackay-Hay Point Region – 2015. JCU Publication, Centre for Tropical Water & Aquatic Ecosystem Research Publication, Cairns.
	McKenna et al. (2016b)	McKenna, S.A., Sozou, A.M., Scott, E.L., Rasheed, M.A., 2016. Port of Abbot Point Long-Term Seagrass Monitoring: Annual Report 2014-2015. JCU Publication, Centre for Tropical Water & Aquatic Ecosystem Research, Cairns.
	McKenna et al. (2017)	McKenna, S., Scott, E., Rasheed, M., 2017 Port of Abbot Point long-term seagrass monitoring program: annual report 2015-16. JCU Publication, centre for Tropical Water & Aquatic Ecosystem Research, Cairns.
	McKenna et al. (2019a)	McKenna, S.A., Wells, J.N., Van De Wetering, C., Rasheed, M.A., 2019. Port of Townsville Bi-annual Seagrass Monitoring Program, Interim Brief Report: April/May 2019. TropWATER, JCU Cairns.
	McKenna et al. (2019b)	McKenna, S.A., Van De Wetering, C., Rasheed, M.A., Wells, J.N., 2019. Port of Townsville Seagrass Monitoring Program, Brief Report: September/October 2019. TropWATER, JCU, Cairns.
	McKenna et al. (2019c)	McKenna, S.A., Rasheed, M.A., Reason, C.L., Wells, J.N., Hoffman, L.R., 2019. Port of Abbot Point Long-Term Seagrass Monitoring Program - 2018’, TropWATER Publication 19/20. Centre for Tropical Water & Aquatic Ecosystem Research, JCU, Cairns.
	McKenna et al. (2020)	McKenna, S., Chartrand, K., Van De Wetering, C., Wells, J., Carter, A.B., Rasheed, M., 2020. Port of Townsville Seagrass Monitoring Program - 2019. TropWATER, JCU, Cairns.
	McKenna et al. (2021)	McKenna, S., Wilkinson, J., Chartrand, K., Van De Wetering, C., 2021. Port of Townsville Seagrass Monitoring Program: 2020. TropWATER Report no. 21/14. Centre for Tropical Water & Aquatic Ecosystem Research, JCU, Cairns, p. 62.
	McKenzie (1994)	McKenzie, L.J., 1994. Seasonal changes in biomass and shoot characteristics of a Zostera capricorni Aschers. dominant meadow in Cairns Harbour, northern Queensland. Australian Journal of Marine and Freshwater Research 45, 1337-1352.
	McKenzie et al. (1996)	McKenzie, L.J., Rasheed, M.A., Lee Long, W.J., Coles, R.G., 1996. Port of Mourilyan Seagrass monitoring, Baseline Surveys - Summer (December) 1993 and Winter (July) 1994. PCQ, Brisbane.
	McKenzie et al. (1997)	McKenzie, L.J., Lee Long, W.J. and Bradshaw, E.J. (1997) Distribution of seagrasses in the Lizard Island Group - a reconnaissance survey, October 1995. CRC Reef Research Centre Technical Report No. 14 (Townsville, CRC Reef Research Centre) 26 pp.
	McKenzie et al. (1998)	McKenzie, L.J., Lee Long, W.J., Roelofs, A.J., Roder, C.A. and Coles, R.G. (1998). ‘Port of Mourilyan Seagrass Monitoring - First 4 Years.’ EcoPorts Monograph Series No 15. (Ports Corporation of Queensland, Brisbane) 34 pp.
	McKenzie et al. (2006)	McKenzie, L.J., Mellors, J.E., Waycott, M., Udy, J., Coles, R.G., 2006. Intertidal Monitoring, in: Schaffelke, B., Waterhouse, J. (Eds.), Water Quality and Ecosystem Monitoring Program - Reef Water Quality Protection Plan. Final Report August 2006 (revised November 2006). CRC Reef Research, Townsville, pp. 230 -275.
	McKenzie et al. (2007)	McKenzie, L.J., Mellors, J., Waycott, M., 2007. Great Barrier Reef Water Quality Protection Plan (Reef Rescue) – Marine Monitoring Program, Intertidal Seagrass Final Report 2006/2007. Marine and Tropical Sciences Research Facility, Cairns p. 124.
	McKenzie et al. (2008)	McKenzie, L.J., Mellors, J., Waycott, M., 2008. Great Barrier Reef Water Quality Protection Plan - Marine Monitoring Program Intertidal Seagrass. Final report for the Sampling Period 1st September 2007 – 31st May 2008., Project 1.1.3 Condition trend and risk in coastal habitats: Seagrass indicators, distribution and thresholds of potential concern. Marine and Tropical Sciences Research Facility, …
	McKenzie et al. (2009)	McKenzie, L.J., Unsworth, R.K.F., 2009. Reef Rescue Marine Monitoring Program: Intertidal Seagrass, Final Report 2008/2009. Fisheries Queensland, Cairns, p. 127.
	McKenzie et al. (2010)	McKenzie, L.J., Unsworth, R.K.F., Waycott, M., 2010. Reef Rescue Marine Monitoring Program: Intertidal Seagrass, Annual Report for the sampling period 1st September 2009 – 31st May 2010. Fisheries Queensland, Cairns p. 136.
	McKenzie et al. (2012)	McKenzie, L.J., Collier, C.J., Waycott, M., 2012. Reef Rescue Marine Monitoring Program: Inshore seagrass, annual report for the sampling period 1st September 2010-31st May 2011. Fisheries Queensland, Cairns, p. 230pp.
	McKenzie et al. (2014a)	McKenzie, LJ., Smith, N., Johns, L., Yoshida, R. and Coles, R. 2014. Development of Wet Tropics WQIP elements - seagrass monitoring. A report to Terrain NRM, Innisfail. Centre for Tropical Water & Aquatic Ecosystem Research (TropWATER) report 14/37. James Cook University, Cairns, Australia. 29 pp.
	McKenzie et al. (2014b)	McKenzie, LJ., Coles, R., Johns, L. and Leech, J. 2014, ‘Post Tropical Cyclone Ita assessment of intertidal seagrass status in dugong and green turtle feeding grounds - Jeannie River to Cape Bedford (Cape York)’. Centre for Tropical Water & Aquatic Ecosystem Research (TropWATER) report 14/25. Cairns, James Cook University, Cairns. 20 pp.
	McKenzie et al. (2014c)	McKenzie, L.J., Collier, C., Waycott, M., 2014. Reef Rescue Marine Monitoring Program - Inshore Seagrass, Annual Report for the sampling period 1st July 2011 – 31st May 2012. TropWATER, James Cook University, Cairns, p. 176.
	McKenzie et al. (2014d)	McKenzie, L.J., Yoshida, R.L., Unsworth, R.K.F., 2014. Disturbance influences the invasion of a seagrass into an existing meadow. Marine Pollution Bulletin 86, 186-196.
	McKenzie et al. (2015a)	McKenzie, L.J., Collier, C., Waycott, M., 2015. Reef Rescue Marine Monitoring Program - Inshore Seagrass, Annual Report for the sampling period 1st June 2012 – 31st May 2013. TropWATER, James Cook University, Cairns.
	McKenzie et al. (2015b)	McKenzie, L.J., Collier, C., Langlois, L., Yoshida, R., Smith, N., Waycott, M., 2015. Reef Rescue Marine Monitoring Program - Inshore Seagrass, Annual Report for the sampling period 1st June 2013 – 31st May 2014. TropWATER, James Cook University, Cairns.
	McKenzie et al. (2016)	McKenzie, L.J., Collier, C.J., Langlois, L.A., Yoshida, R.L., Smith, N., Waycott, M., 2016. Marine Monitoring Program - Inshore Seagrass, Annual Report for the sampling period 1st June 2014 – 31st May 2015. Centre for Tropical Water & Aquatic Ecosystem Research, James Cook University, Cairns.
	McKenzie et al. (2017)	McKenzie, L.J., Collier, C.J., Langlois, L.A., Yoshida, R.L., Smith, N., Waycott, M., 2017. Marine Monitoring Program: Annual report for inshore seagrass monitoring 2015-2016. Great Barrier Reef Marine Park Authority, Townsville.
	McKenzie et al. (2018)	McKenzie, L.J., Collier, C.J., Langlois, L.A., Yoshida, R.L., Smith, N., Waycott, M., 2018. Marine Monitoring Program: Annual Report for inshore seagrass monitoring 2016-2017. Great Barrier Reef Marine Park Authority, Townsville.
	McKenzie et al. (2019)	McKenzie, L.J., Collier, C.J., Langlois, L.A., Yoshida, R.L., Uusitalo, J., Smith, N., Waycott, M., 2019. Marine Monitoring Program: Annual Report for Inshore Seagrass Monitoring 2017–18. Report for the Great Barrier Reef Marine Park Authority. Great Barrier Reef Marine Park Authority, Townsville.
	McKenzie et al. (2021a)	McKenzie, L.J., Collier, C.J., Langlois, L.A., Yoshida, R.L., Uusitalo, J., Waycott, M., 2021. Marine Monitoring Program: Annual Report for Inshore Seagrass Monitoring 2018–19. Report for the Great Barrier Reef Marine Park Authority. Great Barrier Reef Marine Park Authority, Townsville.
	McKenzie et al. (2021b)	McKenzie, L.J., Collier, C.J., Langlois, L.A., Yoshida, R.L., Uusitalo, J., Waycott, M., 2021. Marine Monitoring Program: Annual Report for Inshore Seagrass Monitoring 2019–20. Report for the Great Barrier Reef Marine Park Authority. Great Barrier Reef Marine Park Authority, Townsville.
	Mellors & Waycott (2000)	Mellors, J., Waycott, M., 2000. Aerial Seagrass Survey from Meunga Creek,Cardwell to Russel Island, Cape Bowling Green - 28 August 2000. Briefing to QNPWS. JCU, Townsville.
	Mellors (1991)	Mellors, J.E., 1991. Intra-annual variation in reef top seagrass habitat, Green Island, North Queensland and its effect on the associated natantian fauna. James Cook University; James Cook University of North Queensland, p. 128.
	Mellors (2003)	Mellors, J.E., 2003. Sediment and nutrient dynamics in coastal intertidal seagrass of north eastern tropical Australia. PhD Thesis. James Cook University, Townsville, School of Tropical Environment Studies and Geography, p. 284.
	Mellors et al. (1993)	Mellors, J.E., Marsh, H., Coles, R.G., 1993. Intra-annual changes in seagrass standing crop, Green Island, northern Queensland. Australian Journal of Marine and Freshwater Research 44, 33-42.
	Miyajima et al. (1998)	Miyajima, T., Koike, I., Yamano, H., Iizumi, H., 1998. Accumulation and transport of seagrass-derived organic matter in reef flat sediment of Green Island, Great Barrier Reef. Marine Ecology Progress Series 175, 251-259.
	Moore et al. (2008)	Moore, B., Olds, A., Thorogood, J., 2008. Shute Harbour Marina EIS, Aquatic Ecology. Prepared for Shute Harbour Marina Development Pty Ltd. FRC Environmental, Wellington Point, Qld, p. 160.
	Moran & Jones (2013)	Moran, D., Jones, C., 2013. Lindeman Island Resort Safe Harbour and Temporary Barge Access: Marine Ecology Survey. In Lindeman Great Barrier Reef Resort and SPA, Initial Advice Statement. Prepared for White Horse Australia. BMT WBM Pty Ltd, Brisbane.
	Olds et al. (2005)	Olds, A., Thorburn, L., Conacher, C., Thorogood, J., 2005. Port of Airlie: Baseline seagrass survey (with a description of coral communities), November 2004. Prepared for Windward AB. FRC Environmental, Wellington Point, Qld, p. 54.
	Penn (2008)	Penn, K., 2008. Report for Port of Airlie, Seagrass Monitoring, Pre-Dredge Survey-November 2007. Report prepared for Meridien Pty Ltd. GHD, Mackay.
	Penn (2009)	Penn, K., 2009. Report for Port of Airlie Seagrass Monitoring Pre-Dredge Survey November 2008, report prepared for Meridien Pty Ltd. GHD, Mackay.
	Pitcher et al. (2007)	Pitcher, R., Doherty, P., Arnold, P., Hooper, J., Gribble, N., Bartlett, C., Browne, M., Campbell, N., Cannard, T., Cappo, M., Carini, G., Chalmers, S., Cheers, S., Chetwynd, D., Colefax, A., Coles, R., Cook, S., Davie, P., De'ath, G., Devereux, D., Done, B., Donovan, T., Ehrke, B., Ellis, N., Ericson, G., Fellegara, I., Forcey, K., Furey, M., Gledhill, D., Gordon, S., Haywood, M., Jacobsen, I., …
	Port of Townsville (2016)	Port of Townsville, 2016. Marine Ecology. Section 8, in: Port of Townsville (Ed.), Townsville Port Expansion Project, Additional Information to the Environmnet Impact Statement. Port of Townsville, Townsville, p. 148.
	Preen (2000)	Preen, A., 2000. Dugongs, boats, dolphins and turtles in the Townsville-Cardwell region and recommendations for a boat traffic management plan for the Hinchinbrook Dugong Protection Area. GBRMPA Research Publication No. 67. Great Barrier Reef Marine Park Authority/ Cooperative Research Centre of the Great Barrier Reef World Heritage Area, Townsville.
	Pringle (1989)	Pringle, A.W., 1989. The history of dredging in Cleveland Bay, Queensland and its effect on sediment movement and on the growth of mangroves, corals and seagrass. Great Barrier Reef Marine Park Authority, Townsville.
	QDPI (1995)	QDPI, 1995. Port of Mourilyan Seagrass monitoring, Interim progress report - winter (July) 1995. Northern Fisheries Centre, QDPI, Cairns, p. 20.
	QDPI (1996)	QDPI, 1996. Port of Mourilyan Seagrass monitoring, Interim progress report - summer (December) 1995. Northern Fisheries Centre, QDPI, Cairns, p. 11.
	Rasheed & Roelofs (1997)	Rasheed, M.A. & Roelofs, A.J. (1997) Distribution and Abundance of Ellie Point Seagrasses - December 1996. Unpublished report to the Trinity Inlet Management Program. (QDPI, NFC) 18pp.
	Rasheed & Taylor (2008)	Rasheed, M.A., Taylor, H.A., 2008. Port of Townsville seagrass baseline survey report, 2007 – 2008. DPI&F Publication PR08-4014. DPI&F, Cairns.
	Rasheed & Thomas (2002)	Rasheed, M., Thomas, R., 2002. Seagrass and marine resources of the Upstart Bay dugong protection area, in: Coles, R., Lee Long, W., McKenzie, L.J., Roder, C. (Eds.), Seagrasses and marine resources in the dugong protection areas of Upstart Bay, Newry Region, Sand Bay, Llewellyn Bay, Ince Bay and the Clairview Region, April/May 1999 and October 1999. Great Barrier Reef Marine Park Authority, Town…
	Rasheed (2000)	Rasheed, M.A., 2000. Recovery and succession in north Queensland tropical seagrass communities, School of Tropical Environment Studies and Geography. James Cook University, Townsville, p. 207.
	Rasheed et al. (1994)	Rasheed, M.A., McKenzie, L.J., Lee Long, W.J., Coles, R.G., 1994. Port of Mourilyan Seagrass monitoring, second survey - winter (July) 1994. Northern Fisheries Centre, QDPI, Cairns, p. 35.
	Rasheed et al. (1995)	Rasheed, M.A., McKenzie, L.J., Lee Long, W.J., Coles, R.G., 1994. Port of Mourilyan Seagrass monitoring, Interim progress report - summer (January) 1995. Northern Fisheries Centre, QDPI, Cairns, p. 10.
	Rasheed et al. (2001)	Rasheed, M., Roder, C., Thomas, R., 2001. Port of Mackay Seagrass, Macro-Algae and Macro-Invertebrate Communities. February 2001. CRC Reef Research Centre, Technical Report No. 43. CRC Reef Research Centre, Townsville.
	Rasheed et al. (2003)	Rasheed, M.A., Thomas, R., Roelofs, A.J., Neil, K.M., Kerville, S.P., 2003. Port Curtis and Rodds Bay seagrass and benthic macro-invertebrate community baseline survey, November/December 2002. DPI Information Series QI03058. DPI, Cairns.
	Rasheed et al. (2004a)	Rasheed, M.A., McKenna, S.A., Thomas, R., 2005. Long-term seagrass monitoring in Port Curtis and Rodds Bay, Gladstone - October/November 2004. DPI&F Information Series QI05032. DPI&F, Cairns.
	Rasheed et al. (2004b)	Rasheed, M.A., Thomas, R., Foster, D., 2004. Monitoring of seagrass meadows in Cairns Harbour and Trinity Inlet: December 2003. DPI Information Series QI04044. DPI&F, Cairns.
	Rasheed et al. (2004c)	Rasheed, M.A., Thomas, R., McKenna, S.A., 2004. Port of Hay Point seagrass, algae and benthic macro-invertebrate community survey July 2004. DPI&F, Cairns.
	Rasheed et al. (2005a)	Rasheed, M.A., Taylor, H.A., Thomas, R., 2006. Long-term seagrass monitoring in Port Curtis and Rodds Bay, Gladstone - October 2005. DPI&F Information Series QI06030. DPI&F, Cairns.
	Rasheed et al. (2005b)	Rasheed, M., Thomas, R., McKenna, S., 2005. Port of Abbot Point seagrass, algae and benthic macroinvertebrate community survey - March 2005. DPI&F Information Series QI05044. Primary Industries & Fisheries, QLD Government, Cairns.
	Rasheed et al. (2005c)	Rasheed, M., Thomas, R., Roelofs, A., McKenna, S., 2005. Critical marine habitats adjacent to the high risk Inner Shipping Route in the Shelburne, Margaret and Indian Bays Region, Far North Queensland, Australia - 2005 Atlas. QDPI&F Information Series QI04048. Northern Fisheries Centre, Cairns.
	Rasheed et al. (2006)	Rasheed, M.A., Taylor, H.A., Dew, K., Thomas, R., 2006. Long term seagrass monitoring in Cairns Harbour and Trinity Inlet - December 2005. DPI&F Information Series QI06032. DPI&F, Cairns.
	Rasheed et al. (2007)	Rasheed, M.R., Dew, K.R., McKenna, S.A., Sankey, T.A., Taylor, H.A., Carter, A., 2007. Long term seagrass monitoring in Cairns Harbour and Trinity Inlet - December 2006. DPI&F Publication PR07-2914. DPI&F, Cairns.
	Rasheed et al. (2008a)	Rasheed, M.R., McKenna, S.A., Sankey, T.L., Taylor, H.A., 2008. Long term seagrass monitoring in Cairns Harbour and Trinity Inlet - November 2007. DPI&F Publication PR07-3269. DPI&F, Cairns.
	Rasheed et al. (2008b)	Rasheed, M.A., McKenna, S.A., Taylor, H.A., Sankey, T.L., 2008. Long term seagrass monitoring in Port Curtis and Rodds Bay, Gladstone – October 2007. DPI&F Publication PR07- 3271. DPI&F, Cairns.
	Rasheed et al. (2012)	Rasheed, M.A., Reason, C.L., McCormack, C.V., Chartrand, K.M., Carter, A.B., 2012. Port Curtis and Rodds Bay seagrass monitoring program, November 2011. Fisheries Queensland, DAFF, Cairns.
	Rasheed et al. (2013)	Rasheed, M., McKenna, S., Tol, S., 2013. Seagrass habitat of Cairns Harbour and Trinity Inlet: Annual monitoring and updated baseline survey. Centre for Tropical Water & Aquatic Ecosystem Research Publication 13/17. JCU, Cairns.
	Rasheed et al. (2017)	Rasheed, M., Wells, J., Carter, A., 2017 Seagrasses in Port Curtis and Rodds Bay 2016. Annual long-term monitoring. Centre for Tropical Water & Aquatic Ecosystem Research (TropWATER) Publication 17/02,. James Cook University, Cains.
	Rasheed et al. (2019)	Rasheed, M.A., Reason, C.L., Wells, J.N., 2019. Seagrass habitat of Cairns Harbour and Trinity Inlet: Annual Monitoring Report 2018. TropWATER Publication 19/13. Centre for Tropical Water & Aquatic Ecosystem Research, JCU, Cairns.
	Reason & Rasheed (2018a)	Reason, C.L., Rasheed, M.A., 2018. Seagrass habitat of Mourilyan Harbour: Annual Monitoring Report – 2017. TropWATER Publication 18/10. Centre for Tropical Water & Aquatic Ecosystem Research, JCU, Cairns.
	Reason & Rasheed (2018b)	Reason, C.L., Rasheed, M.A., 2018. Seagrass habitat of Cairns Harbour and Trinity Inlet: Annual Monitoring Report 2017. TropWATER Publication 18/09. Centre for Tropical Water & Aquatic Ecosystem Research, JCU, Cairns.
	Reason et al. (2012a)	Reason, C.L., Chartrand, K.M., Rasheed, M.A., 2012. Long-term seagrass monitoring in Cairns Harbour and Trinity Inlet – September 2011. Fisheries Queensland, DEEDI, Cairns.
	Reason et al. (2012b)	Reason, C.L., Chartrand, K.M., Rasheed, M.A., 2012. Long-term seagrass monitoring in the Port of Mourilyan - November 2011. Fisheries Queensland, DEEDI Publication, Cairns.
	Reason et al. (2016)	Reason, C., York, P.H., Scott, E., McKenna, S.A., Rasheed, M.A., 2016. Seagrass habitat of Mourilyan Harbour: Annual Monitoring Report – 2015. Centre for Tropical Water & Aquatic Ecosystem Research, JCU, Cairns.
	Reason et al. (2017)	Reason, C.L., Sozou, A.M., York, P.H., Rasheed, M.A., 2017. Seagrass habitat of Mourilyan Harbour: Annual Monitoring Report – 2016. Centre for Tropical Water & Aquatic Ecosystem Research, JCU, Cairns.
	Reason et al. (2020)	Reason, C.L., McKenna, S.A., Rasheed, M.A., 2020. Seagrass habitat of Cairns Harbour and Trinity Inlet: Cairns Shipping Development Program and Annual Monitoring Report 2019. TropWATER Publication 20/06. Centre for Tropical Water & Aquatic Ecosystem Research, JCU, Cairns.
	Reason et al. (2021a)	Reason, C., Smith, T., Rasheed, M., 2021. Seagrass habitat of Cairns Harbour and Trinity Inlet: Cairns Shipping Development Program and Annual Monitoring Report 2020. TropWATER Publication 21/09. Centre for Tropical Water & Aquatic Ecosystem Research, JCU, Cairns.
	Reason et al. (2021b)	Reason, C., York, P., Rasheed, M., 2021. Seagrass habitat of Mourilyan Harbour: Annual Monitoring Report – 2020. TropWATER Publication 21/10. Centre for Tropical Water & Aquatic Ecosystem Research, JCU, Cairns, p. 36.
	Richardson (2016)	Richardson, D., 2016. Clump Point Boat Ramp: Marine Ecology, Water Quality & Sediment Sampling Report. BMT WBM Pty Ltd, Brisbane
	Robinson et al. (2001)	Robinson, J.A., Lulla, K.P., Kashiwagi, M., Suzuki, M., Nellis, M.D., Bussing, C.E., Lee Long, W.J., McKenzie, L.J., 2001. Conservation applications of astonaut photographs of earth: Tidal-flat loss (Japan), Elephant effects on vegetation (Botswana), and Seagrass and Mangrove monitoring (Australia). Conservation Biology 15, 876-884.
	Roder & Roelofs (2002)	Roder, C., Roelofs, A., 2002. Seagrass and marine resources of the Llewellyn Bay and Ince Bay dugong protection areas, in: Coles, R., Lee Long, W., McKenzie, L.J., Roder, C. (Eds.), Seagrasses and marine resources in the dugong protection areas of Upstart Bay, Newry Region, Sand Bay, Llewellyn Bay, Ince Bay and the Clairview Region, April/May 1999 and October 1999. Great Barrier Reef Marine Park …
	Roder et al. (1998)	Roder, C.A., Lee Long, W.J., McKenzie, L.J. and Roelofs, A.J. (1998). Proposed Clump Point Boat Ramp & Facilities - Review of Marine Environment Factors (seagrasses and other benthic habitats). Unpublished Report to Queensland Department of Main Roads (Qu
	Roder et al. (2002)	Roder, C., Coles, R., McKenzie, L.J., Lee Long, W., 2002. Seagrass and marine resources of the Clairview region Dugong Protection Area - reconnaissance 1999, in: Coles, R., Lee Long, W., McKenzie, L.J., Roder, C. (Eds.), Seagrasses and marine resources in the dugong protection areas of Upstart Bay, Newry Region, Sand Bay, Llewellyn Bay, Ince Bay and the Clairview Region, April/May 1999 and Octobe…
	Roelofs & Roder (2002)	Roelofs, A., Roder, C., 2002. Seagrass and marine resources of the Newry region and Sand Bay dugong protection areas, in: Coles, R., Lee Long, W., McKenzie, L.J., Roder, C. (Eds.), Seagrasses and marine resources in the dugong protection areas of Upstart Bay, Newry Region, Sand Bay, Llewellyn Bay, Ince Bay and the Clairview Region, April/May 1999 and October 1999. Great Barrier Reef Marine Park A…
	Ryan (2003)	Ryan, C., 2003. Abbot Bay marine habitat survey- December 2002. Scientific Marine, Townsville.
	Sankey & Rasheed (2010)	Sankey, T.L., Rasheed, M.A., 2010. Long Term Seagrass Monitoring in the Port of Mourilyan – November 2009. Fisheries Queensland, DEEDI Publication, Cairns.
	Sankey et al. (2009)	Sankey, T.L., Rasheed, M.A., Unsworth, R.K.F., 2009. Long term seagrass monitoring in the port of Mourilyan – December 2008. QPI&F Publication PR09-4426. QPI&F, Cairns.
	Saunders et al. (2013a)	Saunders, M.I., Roelfsema, C.M., Phinn, S.R., Canto, R.F.C., Brown, C.J., Leon, J.X., 2013. Benthic and substrate cover data derived from photo-transect surveys in Lizard Island Reef conducted on December 10-15, 2011, PANGAEA. 10.1594/PANGAEA.807404.
	Saunders et al. (2013b)	Saunders, M.I., Roelfsema, C.M., Phinn, S.R., Canto, R.F.C., Brown, C.J., Atkinson, S.C., Leon, J.X., 2013. Benthic and substrate cover data derived from photo-transect surveys in Lizard Island, Great Barrier Reef conducted on October 3-7, 2012, PANGAEA. 10.1594/PANGAEA.807406.
	Saunders et al. (2014)	Saunders, M.I., Leon, J.X., Callaghan, D.P., Roelfsema, C.M., Hamylton, S., Brown, C.J., Baldock, T., Golshani, A., Phinn, S.R., Lovelock, C.E., Hoegh-Guldberg, O., Woodroffe, C.D., Mumby, P.J., 2014. Interdependency of tropical marine ecosystems in response to climate change. Nature Climate Change 4, 724-729.
	Saunders et al. (2015)	Saunders, M.I., Bayraktarov, E., Roelfsema, C.M., Leona, J.X., Samper-Villarreal, J., Phinn, S.R., Lovelock, C.E., Mumby, P.J., 2015. Spatial and temporal variability of seagrass at Lizard Island, Great Barrier Reef. Botanica Marina 58, 35–49.
	Sheppard et al. (2002)	Sheppard, R., Roelofs , A. J., Garrett, R. and Helmke, S. A. 2002. Margaret Bay and surrounds: Assessment of fisheries resources August 2001. DPI Infomation Series QI 02003. Cairns. Department of Primary Industries. 94pp.
	Short (1999)	Short, M. (1999) Seagrass communities of Princess Charlotte Bay. Unpublished Report. Queensland Parks & Wildlife (Cairns).
	SKM (1988)	Sinclair Knight Merz, 1988. Public Environmental Report – Boathaven Bay Marina Development, December 1987. Sinclair Knight Merz (SKM).
	SKM (2013)	SKM, 2013. Identification of Alternative Sites for the Placement of Dredge Material at Sea. Appendix D, in: GBRMPA (Ed.), Improved dredge material management for the Great Barrier Reef Region. Great Barrier Reef Marine Park Authority, Townsville, p. 146.
	Smith et al. (2020)	Smith, T., Chartrand, K., Wells, J., Carter, A., Rasheed, M., 2020. Seagrasses in Port Curtis and Rodds Bay 2019: Annual long‐term monitoring and whole of port survey. TropWATER Publication 20/64. Centre for Tropical Water & Aquatic Ecosystem Research, JCU, Cairns, p. 71.
	Smith et al. (2021)	Smith, T., Reason, C., McKenna, S., Rasheed, M., 2021. Seagrasses in Port Curtis and Rodds Bay 2020 Annual long‐term monitoring. TropWATER Publication 21/16. Centre for Tropical Water & Aquatic Ecosystem Research, JCU, Cairns, p. 54.
	Stephenson et al. (1931)	Stephenson, T., Stephenson, A., Tandy, G., 1931. The structure and ecology of Low Isles and other reefs. Great Barrier Reef Expedition, 1928-29: scientific reports 3, 17-112.
	Stephenson et al. (1958)	Stephenson, W., Endean, R., Bennett, I., 1958. An Ecological Survey of the Marine Fauna of Low Isles, Queensland. Marine and Freshwater Research 9, 261-318.
	Stoddart et al. (1978)	Stoddart, D.R., McLean, R.F., Scoffin, T.P., Gibbs, P.E., 1978. Forty-Five Years of Change on Low Wooded Islands, Great Barrier Reef. Philosophical Transactions of the Royal Society of London. Series B, Biological Sciences 284, 63-80.
	Taylor & Rasheed (2010)	Taylor, H.A., Rasheed, M.A., 2010. Port of Townsville Long-term Seagrass Monitoring, October 2009. Fisheries Queensland, DEEDI, Cairns.
	Taylor & Rasheed (2011)	Taylor, H.A., Rasheed, M.A., 2011. Port of Townsville Long-term Seagrass Monitoring, October 2010. Fisheries Queensland, DEEDI, Cairns.
	Taylor (2021)	Taylor, F., 2021. Google Earth Blog. https://www.gearthblog.com/.
	Taylor et al. (2007)	Taylor, H.A., Rasheed, M.A., Dew, K., Sankey, T.L., 2007. Long term seagrass monitoring in Port Curtis and Rodds Bay, Gladstone – November 2006. DPI&F Publication PR07- 2774. DPI&F, Cairns.
	Taylor et al. (2010)	Taylor, H., McKenna, S., Rasheed, M., 2010. Bustard Bay Seagrass Baseline Assessment November 2009. DEEDI, QLD Gov, Fisheries Queensland, Cairns.
	Thomas & Rasheed (2001)	Thomas, R., Rasheed, M.A., 2001. Port of Mourilyan Seagrass Monitoring - Winter (July) and Summer (December) 2000. Queensland Fisheries Service, Northern Fisheries Centre, Carins, p. 20.
	Thomas & Rasheed (2002)	Thomas, R., Rasheed, M.A., 2002. Port of Mourilyan Seagrass Monitoring. December 2001. Report to the Ports Corporation of Queensland. (Queensland Fisheries Service, Northern Fisheries Centre, Cairns), 13 pp.
	Thomas & Rasheed (2003)	Thomas, R., Rasheed, M.A., 2003. Port of Mourilyan Long Term Seagrass Monitoring, Progress Report - December 2002. Report to the Ports Corporation of Queensland. Queensland Department of Primary Industries: Northern Fisheries Centre, Cairns, p. 13 pp.
	Thomas & Rasheed (2004)	Thomas, R., Rasheed, M.A., 2004. Port of Mourilyan long-term seagrass monitoring - December 2003. Report to Ports Corporation Queensland. Northern Fisheries Centre, Queensland Fisheries Service, Cairns.
	Thomas & Rasheed (2011)	Thomas, R., Rasheed, M., 2011. Port of Hay Point Seagrass, Algae and Benthic Macro-invertebrate Survey - October 2010. DEEDI, Cairns.
	Thomas et al. (2005)	Thomas, R., Rasheed, M.A., McKenna, S.A., 2005. Long term seagrass monitoring in Cairns Harbour and Trinity Inlet - December 2004. DPI&F Information Series QI05036. DPI&F, Cairns.
	Thomas et al. (2006)	Thomas, R., Rasheed, M.A., Taylor, H.A., 2006. Long term seagrass monitoring in the Port of Mourilyan - November 2005. DPI&F Information Series QI06031. Northern Fisheries Centre, DPI&F, Cairns.
	Thomas et al. (2009)	Thomas, R., Unsworth, R.K.F., Rasheed, M.A., 2010. Seagrasses of Port Curtis and Rodds Bay and long term seagrass monitoring, November 2009. DEEDI, Cairns.
	Thomas et al. (2012)	Thomas, R., Leith, M., Rasheed, M.A., 2012. Port of Hay Point Seagrass Survey - November 2011. DAFF, Cairns.
	Thorogood & Boggon (1999a)	Thorogood, J., Boggon, T., 1999. Pioneer Bay Environmental Monitoring Program: Fourth monitoring event, November 1999. Undertaken on behalf of Whitsunday Shire Council. FRC Coastal Resource & Environmental, Wellington Point, Brisbane.
	Thorogood & Boggon (1999b)	Thorogood, J., Boggon, T., 1999. Proposed Shute Bay Dredging and Spoil Deposition: Seagrass and Fisheries Studies, Report prepared for Whitsunday Shire Council. FRC Environmental, Wellington Point, Qld, p. 28.
	Thorogood & Conoacher (1999)	Thorogood, J., Conacher, C., 1999. Ca!rns Cityport lAS: Aquatic Flora and Fauna. Prepared for Cairns Port Authority. FRC Environmental, Wellington Point, p. 94.
	Thorogood & Fowler (2003)	Thorogood, J., Fowler, R., 2003. Distribution of Seagrass within Boathaven Bay August 2003. Report to Windward AB Pty Ltd. FRC Environmental, Wellington Point, p. 10.
	Thorogood (1999a)	Thorogood, J., 1999. Pioneer Bay Environmental Monitoring Program: Second monitoring event, November 1998. Prepared for Whitsunday Shire Council. FRC Coastal Resource & Environmental, Wellington Point, Brisbane.
	Thorogood (1999b)	Thorogood, J., 1999. Pioneer Bay Environmental Monitoring Program: Third monitoring event, May 1999. Undertaken on behalf of Whitsunday Shire Council. FRC Coastal Resource & Environmental, Wellington Point, Brisbane.
	Thorogood (1999c)	Thorogood, J., 1999. Abel Point Marina Expansion, Impact Assessment Study: Aquatic Ecology: Subtidal Plora; Benthic Invertebrate Fauna; Turtles and Dugong. Prepared for PPK Environment & Infrastructure. FRC Coastal Resource & Environmental, Wellington Point, Brisbane, p. 33.
	Thorogood (2002)	Thorogood, J., 2002. Marine Ecosystems, in: WBM Oceanics Australia (Ed.), Port of Airlie marina development, Supplementary EIS. FRC Environmental, Wellington Point, Qld, p. 50.
	Thorogood (2017)	Thorogood, J., 2017. Environmental monitoring: strategic planning tool or bureaucratic box-ticking? How Whitsunday Shire Council got ahead of the curve, in: Australian Coastal Society (ACS) (Ed.), 6th Queensland Coastal Conference 2017. Australian Coastal Society Ltd, 5-7 September 2017, Lure Abell Point Marina, Airlie Beach, p. 18.
	Thorogood et al. (2002a)	Thorogood, J., Conacher, C., Fowler, R., 2002. Shute Bay Dredging and Spoil Deposition: Post-Dredging Seagrass Monitoring February 2002. Prepared for Whitsunday Shire Council. FRC Environmental, Wellington Point, Qld, p. 13.
	Thorogood et al. (2002b)	Thorogood, J., Conacher, C., Fowler, R., 2002. Shute Bay Dredging and Spoil Deposition – Post Dredging Seagrass Monitoring, October 2002. Prepared for Whitsunday Shire Council. FRC Environmental, Wellington Point, Qld, p. 20.
	Thorogood et al. (2002c)	Thorogood, J., Conacher, C., Fowler, R., 2002. Pioneer Bay Environmental Monitoring Program: Ninth Monitoring Event, June 2002. A report prepared for Whitsunday Shire Council. FRC Environmental, Wellington Point, Qld, p. 62.
	Thorogood et al. (2003a)	Thorogood, J., Conacher, C., Fowler, R., 2003. Pioneer Bay Environmental Monitoring Program: Tenth Monitoring Event, April 2003. A report prepared for Whitsunday Shire Council. FRC Environmental, Wellington Point, Qld, p. 43.
	Thorogood et al. (2003b)	Thorogood, J., Fowler, R., Conacher, C., 2003. Shute Bay Dredging and Spoil Deposition – Post Dredging Seagrass Monitoring, February 2003. Prepared for Whitsunday Shire Council. FRC Environmental, Wellington Point, Qld, p. 19.
	Unsworth et al. (2009)	Unsworth, R., Rasheed, M., Taylor, H., 2009. Port of Townsville long term seagrass monitoring, October 2008. DEEDI Publication PR09-4330. QPIF, Cairns.
	Unsworth et al. (2010)	Unsworth, R.K.F., McKenna, S.A., Rasheed, M.A., 2010. Seasonal dynamics, productivity and resilience of seagrass at the Port of Abbot Point: 2008 – 2010. Fisheries Queensland, DEEDI, Cairns.
	Van De Wetering et al. (2020a)	Van De Wetering, C., Carter, A., Rasheed, M., 2020. Seagrass habitat of Mourilyan Harbour: Annual Monitoring Report – 2019. TropWATER Publication 20/09. Centre for Tropical Water & Aquatic Ecosystem Research, JCU, Cairns.
	Van de Wetering et al. (2020b)	Van de Wetering, C., Carter, A.B., Wilkinson, J., Rasheed, M.A., 2020. Mackay-Whitsunday-Isaac Seagrass Monitoring 2019: Marine Inshore South Zone. TropWATER Publication 20/18. James Cook University, Cairns.
	Van De Wetering et al. (2020c)	Van De Wetering, C., York, P.H., Reason, C.L., Wilkinson, J., Rasheed, M.A., 2020. Port of Abbot Point Long‐Term Seagrass Monitoring Program ‐ 2019. TropWATER Publication 20/12. Centre for Tropical Water & Aquatic Ecosystem Research, JCU, Cairns.
	van R. Classen et al (1984)	van R. Classen, D., Jupp, D., Bolton, J.J., Zell, L., 1984. An initial investigation into the mapping of seagrass and water colour with CZCS and Landset in North Queensland, Australia. Great Barrier Reef Marine Park Authority and CSIRO Division of Water and Land Resources, Townsville, p. 19.
	Waterhouse et al. (2016)	Waterhouse, J., Brodie, J., Coppo, C., Tracey, D., da Silva, E., Howley, C., Petus, C., McKenzie, L., Lewis, S., McCloskey, G., Higham, W., 2016. Assessment of the relative risk of water quality to ecosystems of the eastern Cape York NRM Region, Great Barrier Reef. A report to South Cape York Catchments. TropWATER Report 16/24, . TropWATER (JCU), Townsville, Australia., p. 105.
	WBM (1998)	WBM, 1998. Whitsunday Sailing Club Port of Airlie Marina Development Proposal, Draft Impact Assessment Study, Specialist report covering coastal processes, coastal management, water quality, flora and fauna, aquatic ecology and fisheries, noise and air quality, December 1998. WBM Oceanics Australia (WBM).
	WBM Oceanics Australia (1995)	WBM Oceanics Australia, 1995. Aquatic Flora, Hamilton Prawn Farm Environmental Impact Study, a report prepared by Pacific Aquaculture & Environment.
	Wells et al. (2017)	Wells, J.N., Rasheed, M.A., 2017. Port of Townsville Annual Seagrass Monitoring and Baseline Survey: September - October 2016. TropWATER report 17/01. James Cook University Publication, Centre for Tropical Water & Aquatic Ecosystem Research (TropWATER), Cairns.
	Wells et al. (2019)	Wells, J.N., Reason, C.L., Rasheed, M.A., 2019. Seagrass habitat of Mourilyan Harbour: Annual Monitoring Report – 2018. TropWATER Publication 19/1. Centre for Tropical Water & Aquatic Ecosystem Research, JCU, Cairns.
	Williams (2012)	Williams, J., 2012. Port of Airlie Seagrass Monitoring, Post-Dredge Survey, July 2012. Report for Risk Strategies. Biosis Research Pty. Ltd, Melbourne.
	York & Rasheed (2017)	York, P.H., Rasheed, M.A., 2017. Seagrass habitat of Cairns Harbour and Trinity Inlet: Annual Monitoring Report 2016. TropWATER Publication 17/27. Centre for Tropical Water & Aquatic Ecosystem Research, JCU, Cairns.
	York & Rasheed (2018)	York, P.H., Rasheed, M.A., 2018. Annual Seagrass Monitoring in the Mackay‐Hay Point Region – 2017. TropWATER, JCU, Cairns.
	York & Rasheed (2019)	York, P.H., Rasheed, M.A., 2019. Annual Seagrass Monitoring in the Mackay‐Hay Point Region – 2018. TropWATER, JCU, Cairns.
	York & Rasheed (2020)	York, P.H., Rasheed, M.A., 2020. Annual Seagrass Monitoring in the Mackay‐Hay Point Region – 2019. TropWATER, JCU, Cairns.
	York & Rasheed (2021)	York, P., Rasheed, M., 2021. Annual Seagrass Monitoring in the Mackay-Hay Point Region – 2020. TropWATER Publication 21/20. Centre for Tropical Water & Aquatic Ecosystem Research, JCU, Cairns, p. 42.
	York et al. (2014)	York, P.H., Davies, J.N., Rasheed, M.A., 2014. Long-term seagrass monitoring in the Port of Mourilyan – 2013. Centre for Tropical Water & Aquatic Ecosystem Research, JCU, Cairns.
	York et al. (2015)	York, P.H., Scott, E., Rasheed, M.A., 2015. Long-term seagrass monitoring in the Port of Mourilyan – 2014. JCU Publication, Centre for Tropical Water & Aquatic Ecosystem Research, JCU, Cairns.
	York et al. (2016)	York, P., Reason, C., Scott, E., Sankey, T., Rasheed, M., 2016. Seagrass habitat of Cairns Harbour and Trinity Inlet: Annual Monitoring Report 2015. TropWATER Publication 16/13 Centre for Tropical Water & Aquatic Ecosystem Research, JCU, Cairns.
