# Supplementary material
Source: MDPI journal article supplement (https://www.mdpi.com/2072-4292/14/11/2604)
Supplement: s1 [file s1]

Archive with 2 entries (2 files):
- remotesensing-1667581-SUPPL-MATERIALS.pdf
- remotesensing-1667581-SUPPL_TABLE_S1.xlsx
